# Supplementary material for: Synthesis of 3-bromosubstituted pyrroles via palladium-catalyzed intermolecular oxidative cyclization of bromoalkynes with N-allylamines
Source: Royal Society of Chemistry journal article supplement (doi:10.1039/c4cc10322j), 2015-01-01
Supplement: c4cc10322j1.pdf [file c4cc10322j1.pdf]

# Synthesis of 3-Bromosubstituted Pyrroles *via* Palladium-Catalyzed Intermolecular Oxidative Cyclization of Bromoalkynes with *N*-Allylamines

Jia Zheng, Liangbin Huang, Zun Li, Wanqing Wu, Jianxiao Li, Huanfeng Jiang\*

School of Chemistry and Chemical Engineering, South China University of Technology,

Guangzhou 510640, P. R. China

[jianghf@scut.edu.cn](mailto:jianghf@scut.edu.cn)

## Supporting Information

|                                                                       |     |
|-----------------------------------------------------------------------|-----|
| A. General methods.....                                               | S2  |
| B. General procedure for the synthesis of pyrrole derivatives.....    | S2  |
| C. Reactions between other haloalkynes and <i>N</i> -allylamines..... | S2  |
| D. Analytical data for pyrrole derivatives.....                       | S2  |
| E. NMR Spectra.....                                                   | S13 |
| F. Studies on the stereochemistry of <b>3fa</b> and <b>5a</b> .....   | S45 |
| G. X-ray Crystallographic Analysis of <b>9</b> .....                  | S47 |

## A. General methods

$^1\text{H}$  and  $^{13}\text{C}$  NMR spectra were recorded on a 400 MHz spectrometer using  $\text{CDCl}_3$  as solvent and TMS as an internal standard. Mass spectra were obtained with gas chromatography mass spectrometer. IR spectra were obtained either as potassium bromide pellets or as liquid films between two potassium bromide pellets with a spectrometer. GC-MS was obtained using electron ionization. HRMS was obtained with a LCMS-IT-TOF mass spectrometer.

## B. General procedure for the synthesis of pyrrole derivatives

*N*-Allylamine (0.2 mmol), bromoalkynes (0.2 mmol),  $\text{PdCl}_2$  (10 mol %) and BQ (2 equiv) were added to 2 mL toluene/DMSO (5/1). The mixture was stirred under air at 110 °C for the desired reaction time. After that, water was added and extracted with ethyl acetate twice. The combined organic phase was dried over  $\text{Na}_2\text{SO}_4$  and concentrated. The residue was eventually purified by flash column chromatography on silica gel with petroleum ether/ethyl acetate as the eluent to afford the corresponding pyrroles.

## C. Reactions between other haloalkynes and *N*-allylamines

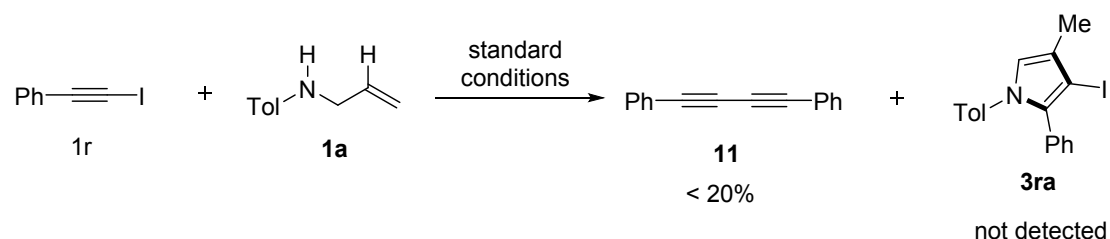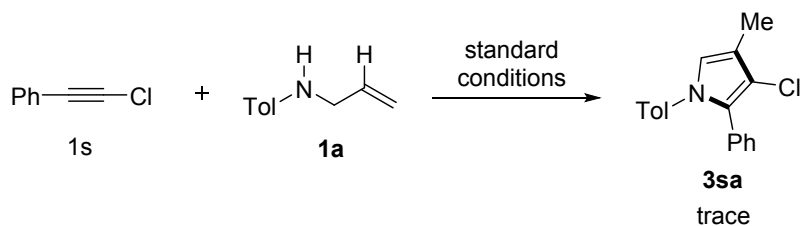

## D. Analytical data for pyrrole derivatives

### 3-Bromo-4-methyl-2-phenyl-1-(*p*-tolyl)-1*H*-pyrrole (3aa)

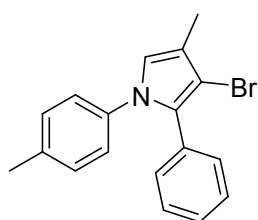

White solid. M.p.: 96-97 °C. <sup>1</sup>H NMR (400 MHz, CDCl<sub>3</sub>) δ 7.15 (dd, *J* = 12.6, 5.9 Hz, 5H), 6.96 (d, *J* = 7.9 Hz, 2H), 6.84 (d, *J* = 7.9 Hz, 2H), 6.66 (s, 1H), 2.22 (s, 3H), 2.08 (s, 3H). <sup>13</sup>C NMR (101 MHz, CDCl<sub>3</sub>) δ 137.8, 136.3, 131.3, 130.4, 130.3, 129.5, 127.9, 127.1, 125.1, 120.6, 119.5, 100.9, 20.9, 11.3 ppm. MS (EI, 70 eV) *m/z*: 91, 128, 231, 246, 325. HRMS (ESI) *m/z*: calcd for C<sub>18</sub>H<sub>17</sub>BrN [M+H]<sup>+</sup>, 326.0539; found, 326.0535. IR (KBr): 2922, 2854, 1670, 1608, 1514, 1445, 1356, 1042, 695 cm<sup>-1</sup>.

### 3-Bromo-1-(4-methoxyphenyl)-4-methyl-2-phenyl-1*H*-pyrrole (3ab)

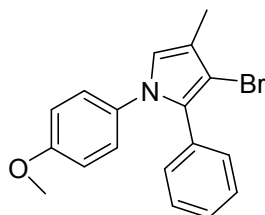

Red solid. M.p.: 90-92 °C. <sup>1</sup>H NMR (400 MHz, CDCl<sub>3</sub>) δ 7.14 (dd, *J* = 11.7, 5.9 Hz, 5H), 6.88 (d, *J* = 8.4 Hz, 2H), 6.68 (d, *J* = 8.5 Hz, 2H), 6.63 (s, 1H), 3.67 (s, 3H), 2.07 (s, 3H). <sup>13</sup>C NMR (101 MHz, CDCl<sub>3</sub>) δ 158.1, 133.5, 131.3, 130.6, 130.4, 127.9, 127.1, 126.6, 120.7, 119.3, 114.1, 100.6, 55.4, 11.3 ppm. MS (EI, 70 eV) *m/z*: 77, 128, 231, 262, 341. HRMS (ESI) *m/z*: calcd for C<sub>18</sub>H<sub>17</sub>BrNO [M+H]<sup>+</sup>, 342.0488; found, 342.0489. IR (KBr): 2924, 2850, 1605, 1512, 1463, 1248, 1039, 833 cm<sup>-1</sup>.

### 3-Bromo-4-methyl-1,2-diphenyl-1*H*-pyrrole (3ac)

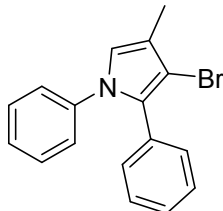

White solid. M.p.: 81-82 °C. <sup>1</sup>H NMR (400 MHz, CDCl<sub>3</sub>) δ 7.35 – 7.19 (m, 8H), 7.07 (d, *J* = 7.4 Hz, 2H), 6.81 (s, 1H), 2.20 (s, 3H). <sup>13</sup>C NMR (101 MHz, CDCl<sub>3</sub>) δ 140.3, 131.2, 130.4, 130.3, 128.9, 127.9, 127.2, 126.5, 125.3, 120.5, 119.7, 101.3, 11.3 ppm. MS (EI, 70 eV) *m/z*: 77, 128, 232, 311. HRMS (ESI) *m/z*: calcd for C<sub>17</sub>H<sub>15</sub>BrN [M+H]<sup>+</sup>, 312.0382; found, 312.0376. IR (KBr): 3063, 2922, 1851, 1598, 1498, 1355, 757, 697 cm<sup>-1</sup>.

### 3-Bromo-1-(4-fluorophenyl)-4-methyl-2-phenyl-1*H*-pyrrole (3ad)

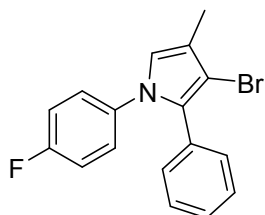

Yellow solid. M.p.: 116-117 °C. <sup>1</sup>H NMR (400 MHz, CDCl<sub>3</sub>) δ 7.14 (m, 5H), 6.95 – 6.88 (m, 2H), 6.84 (t, *J* = 8.3 Hz, 2H), 6.63 (s, 1H), 2.07 (s, 3H). <sup>13</sup>C NMR (100 MHz,

CDCl<sub>3</sub>)  $\delta$  161.0 (d,  $J = 245$  Hz), 136.4 (d,  $J = 3$  Hz), 131.0, 130.7, 130.4, 130.1, 128.0, 127.3, 126.9 (d,  $J = 8$  Hz), 120.6, 119.8, 115.8 (d,  $J = 23$  Hz), 101.2, 11.3 ppm; MS (EI, 70 eV)  $m/z$ : 95, 125, 250, 329. HRMS (ESI)  $m/z$ : calcd for C<sub>17</sub>H<sub>14</sub>BrFN [M+H]<sup>+</sup>, 330.0288; found, 330.0285. IR (KBr): 2924, 2853, 1603, 1510, 1465, 1356, 1225, 839 cm<sup>-1</sup>.

### 3-Bromo-1-(4-chlorophenyl)-4-methyl-2-phenyl-1H-pyrrole (3ae)

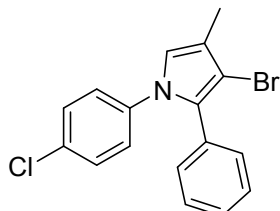

Yellow solid. M.p.: 101-103 °C. <sup>1</sup>H NMR (400 MHz, CDCl<sub>3</sub>)  $\delta$  7.21 – 7.09 (m, 7H), 6.87 (d,  $J = 8.2$  Hz, 2H), 6.64 (s, 1H), 2.07 (s, 3H). <sup>13</sup>C NMR (101 MHz, CDCl<sub>3</sub>)  $\delta$  138.8, 132.2, 130.9, 130.5, 130.4, 129.1, 128.1, 127.4, 126.4, 120.3, 120.2, 101.8, 11.3 ppm. MS (EI, 70 eV)  $m/z$ : 115, 128, 231, 266, 347. HRMS (ESI)  $m/z$ : calcd for C<sub>17</sub>H<sub>14</sub>ClFN [M+H]<sup>+</sup>, 345.9993; found, 345.9990. IR (KBr): 3064, 2924, 2852, 1652, 1601, 1495, 1354, 1093, 1043, 832 cm<sup>-1</sup>.

### 3-Bromo-1-(4-isopropylphenyl)-4-methyl-2-phenyl-1H-pyrrole (3af)

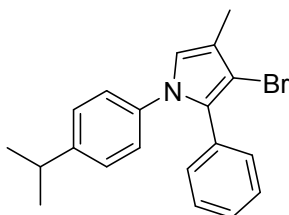

Yellow oil. <sup>1</sup>H NMR (400 MHz, CDCl<sub>3</sub>)  $\delta$  7.23 (d,  $J = 11.1$  Hz, 5H), 7.09 (d,  $J = 7.6$  Hz, 2H), 6.94 (d,  $J = 7.7$  Hz, 2H), 6.74 (s, 1H), 2.92 – 2.81 (m, 1H), 2.15 (s, 3H), 1.21 (d,  $J = 6.7$  Hz, 6H). <sup>13</sup>C NMR (100 MHz, CDCl<sub>3</sub>)  $\delta$  147.2, 138.0, 131.3, 130.4, 130.3, 127.8, 127.1, 126.9, 125.1, 120.6, 119.4, 100.9, 33.58, 23.89, 11.28. ppm; MS (EI, 70 eV)  $m/z$ : 128, 259, 231, 274, 353. HRMS (ESI)  $m/z$ : calcd for C<sub>20</sub>H<sub>21</sub>BrN [M+H]<sup>+</sup>, 354.0852; found, 354.0850. IR (KBr): 2961, 2927, 2868, 1688, 1514, 1452, 1370, 1023, 705 cm<sup>-1</sup>.

### 3-Bromo-4-methyl-2-phenyl-1-(*m*-tolyl)-1H-pyrrole (3ag)

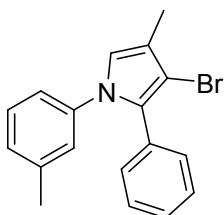

White solid. M.p.: 90-91 °C. <sup>1</sup>H NMR (400 MHz, CDCl<sub>3</sub>)  $\delta$  7.29–7.23 (m, 5H), 7.13 (t,  $J = 7.7$  Hz, 1H), 7.03 (d,  $J = 7.5$  Hz, 1H), 6.93 (s, 1H), 6.80 (d,  $J = 8.5$  Hz, 2H), 2.29



(s, 3H), 2.19 (s, 3H).  $^{13}\text{C}$  NMR (100 MHz,  $\text{CDCl}_3$ )  $\delta$  140.2, 138.9, 131.3, 130.4, 130.3, 128.6, 127.8, 127.2, 127.1, 125.8, 122.5, 120.5, 119.5, 101.1, 21.3, 11.3 ppm; MS (EI, 70 eV)  $m/z$ : 91, 129, 231, 246, 325. HRMS (ESI)  $m/z$ : calcd for  $\text{C}_{18}\text{H}_{17}\text{BrN}$   $[\text{M}+\text{H}]^+$ , 326.0539; found, 326.0537. IR (KBr): 3064, 2924, 2854, 1647, 1603, 1496, 1460, 1389, 1355, 1043, 766, 696  $\text{cm}^{-1}$ .

### 3-Bromo-4-methyl-2-phenyl-1-(*o*-tolyl)-1*H*-pyrrole (3ah)

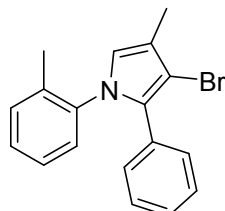

White solid. M.p.: 88-89 °C.  $^1\text{H}$  NMR (400 MHz,  $\text{CDCl}_3$ )  $\delta$  7.13 – 6.98 (m, 9H), 6.49 (s, 1H), 2.08 (s, 3H), 1.82 (s, 3H).  $^{13}\text{C}$  NMR (100 MHz,  $\text{CDCl}_3$ )  $\delta$  139.6, 135.4, 131.5, 131.2, 130.7, 129.8, 128.3, 128.0, 127.8, 126.9, 126.4, 120.8, 119.3, 99.6, 17.6, 11.4 ppm; MS (EI, 70 eV)  $m/z$ : 91, 129, 231, 246, 325. HRMS (ESI)  $m/z$ : calcd for  $\text{C}_{18}\text{H}_{17}\text{BrN}$   $[\text{M}+\text{H}]^+$ , 326.0539; found, 326.0534. IR (KBr): 3064, 2923, 2853, 1645, 1604, 1496, 1462, 1389, 1355, 1043, 766, 696  $\text{cm}^{-1}$ .

### 1-([1,1'-Biphenyl]-2-yl)-3-bromo-4-methyl-2-phenyl-1*H*-pyrrole (3ai)

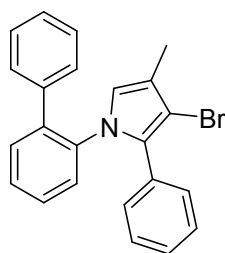

Yellow solid. M.p.: 134-135 °C.  $^1\text{H}$  NMR (400 MHz,  $\text{CDCl}_3$ )  $\delta$  7.31-7.25 (m, 3H), 7.14 (d,  $J = 6.3$  Hz, 1H), 7.08 (d,  $J = 7.2$  Hz, 1H), 7.01 (t,  $J = 7.4$  Hz, 2H), 6.95 (d,  $J = 7.0$  Hz, 1H), 6.89 (t,  $J = 7.3$  Hz, 2H), 6.61 (s, 1H), 6.56 (d,  $J = 7.5$  Hz, 2H), 6.49 (d,  $J = 7.5$  Hz, 2H), 2.05 (s, 3H).  $^{13}\text{C}$  NMR (100 MHz,  $\text{CDCl}_3$ ) 138.7, 138.2, 138.0, 131.4, 130.9, 130.8, 129.4, 128.1, 128.0, 127.9, 127.3, 127.0, 126.4, 120.7, 119.7, 99.9, 11.4 ppm; MS (EI, 70 eV)  $m/z$ : 145, 231, 307, 387. HRMS (ESI)  $m/z$ : calcd for  $\text{C}_{23}\text{H}_{18}\text{BrNNa}$   $[\text{M}+\text{H}]^+$ , 410.0515; found, 410.0513. IR (KBr): 3610, 2923, 2853, 1602, 1482, 1437, 1354, 1045, 766, 738, 696  $\text{cm}^{-1}$ .

### 1-(Benzo[*d*][1,3]dioxol-5-yl)-3-bromo-4-methyl-2-phenyl-1*H*-pyrrole (3aj)

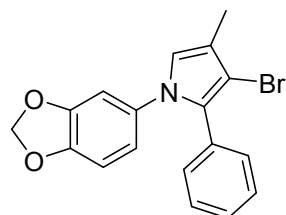

Yellow oil.  $^1\text{H}$  NMR (400 MHz,  $\text{CDCl}_3$ )  $\delta$  7.28 – 7.03 (m, 6H), 6.62 (s, 1H), 6.59 (d,  $J = 8.7$  Hz, 1H), 6.46 (s, 2H), 5.87 (s, 2H), 2.07 (s, 3H).  $^{13}\text{C}$  NMR (100 MHz,  $\text{CDCl}_3$ )  $\delta$  147.7, 146.3, 134.6, 131.1, 130.6, 130.3, 127.9, 127.2, 120.8, 119.4, 118.9, 107.9, 107.1, 101.6, 100.7, 11.2. ppm; MS (EI, 70 eV)  $m/z$ : 108, 218, 246, 276, 355. HRMS (ESI)  $m/z$ : calcd for  $\text{C}_{18}\text{H}_{14}\text{BrNNaO}_2$   $[\text{M}+\text{H}]^+$ , 378.0100; found, 378.0095. IR (KBr): 2922, 2853, 1692, 1494, 1452, 1243, 1038  $\text{cm}^{-1}$ .

### 3-Bromo-4-ethyl-2-phenyl-1-(*p*-tolyl)-1*H*-pyrrole (3ak)

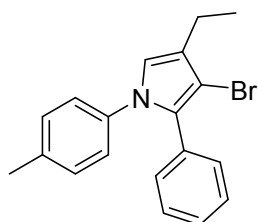

Red solid. M.p.: 65-66  $^{\circ}\text{C}$ .  $^1\text{H}$  NMR (400 MHz,  $\text{CDCl}_3$ )  $\delta$  7.26 – 7.20 (m, 5H), 7.03 (d,  $J = 7.9$  Hz, 2H), 6.92 (d,  $J = 7.9$  Hz, 2H), 6.71 (s, 1H), 2.56 (q,  $J = 7.4$  Hz, 2H), 2.29 (s, 3H), 1.28 (t,  $J = 7.5$  Hz, 3H).  $^{13}\text{C}$  NMR (100 MHz,  $\text{CDCl}_3$ )  $\delta$  137.9, 136.3, 131.30, 130.5, 130.4, 129.5, 127.9, 127.1, 126.0, 125.1, 119.7, 99.9, 20.9, 19.6, 14.01. ppm; MS (EI, 70 eV)  $m/z$ : 91, 115, 128, 202, 244, 341. HRMS (ESI)  $m/z$ : calcd for  $\text{C}_{19}\text{H}_{19}\text{BrN}$   $[\text{M}+\text{H}]^+$ , 340.0695; found, 340.0695. IR (KBr): 2964, 2924, 2858, 1656, 1608, 1514, 1463, 1375, 1069, 821, 700  $\text{cm}^{-1}$ .

### 3-Bromo-1-(4-bromophenyl)-4-ethyl-2-phenyl-1*H*-pyrrole (3al)

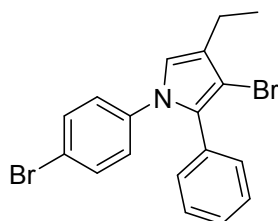

Yellow solid. M.p.: 132-134  $^{\circ}\text{C}$ .  $^1\text{H}$  NMR (400 MHz,  $\text{CDCl}_3$ )  $\delta$  7.29 (d,  $J = 7.9$  Hz, 2H), 7.20 – 7.18 (m, 3H), 7.12 (d,  $J = 7.3$  Hz, 2H), 6.84 (d,  $J = 7.9$  Hz, 2H), 6.63 (s, 1H), 2.48 (q,  $J = 7.4$  Hz, 2H), 1.20 (t,  $J = 7.0$  Hz, 3H).  $^{13}\text{C}$  NMR (100 MHz,  $\text{CDCl}_3$ )  $\delta$  139.4, 132.1, 130.9, 130.5, 130.4, 128.1, 127.4, 126.8, 126.7, 119.9, 119.4, 100.9, 19.6, 13.9. ppm; MS (EI, 70 eV)  $m/z$ : 115, 128, 155, 230, 405. HRMS (ESI)  $m/z$ : calcd for  $\text{C}_{18}\text{H}_{16}\text{Br}_2\text{N}$   $[\text{M}+\text{H}]^+$ , 403.9644; found, 403.9646. IR (KBr): 2965, 2926, 2854, 1694, 1596, 1491, 1370, 1067, 828, 754, 699  $\text{cm}^{-1}$ .

### 3-Bromo-1-(3,5-dimethylphenyl)-4-ethyl-2-phenyl-1*H*-pyrrole (3am)

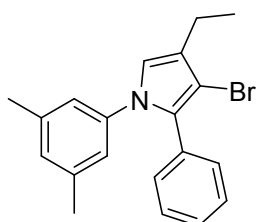

Red oil.  $^1\text{H}$  NMR (400 MHz,  $\text{CDCl}_3$ )  $\delta$  7.25 – 7.21(m, 5H), 6.82 (s, 1H), 6.72 (s, 1H), 6.65 (s, 2H), 2.56 (q,  $J = 7.1$  Hz, 2H), 2.19 (s, 6H), 1.28 (d,  $J = 7.4$  Hz, 3H).  $^{13}\text{C}$  NMR (100 MHz,  $\text{CDCl}_3$ )  $\delta$  140.2, 138.6, 131.3, 130.4, 130.3, 128.1, 127.8, 127.1, 125.9, 123.0, 119.6, 99.9, 21.1, 19.6, 14.0. ppm. MS (EI, 70 eV)  $m/z$ : 77, 128, 259, 353. HRMS (ESI)  $m/z$ : calcd for  $\text{C}_{20}\text{H}_{20}\text{BrNNa}$   $[\text{M}+\text{H}]^+$ , 376.0671; found, 376.0674. IR (KBr): 2965, 2925, 2855, 1686, 1602, 1458, 1369, 1267, 757  $\text{cm}^{-1}$ .

### 3-Bromo-4-isopropyl-2-phenyl-1-(*p*-tolyl)-1*H*-pyrrole (3an)

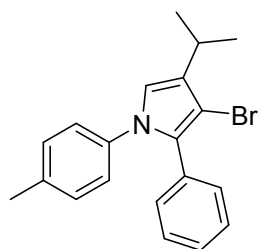

Yellow solid. M.p.: 73-74  $^{\circ}\text{C}$ .  $^1\text{H}$  NMR (400 MHz,  $\text{CDCl}_3$ )  $\delta$  7.17 – 7.13 (m, 5H), 6.96 (d,  $J = 7.7$  Hz, 2H), 6.85 (d,  $J = 7.7$  Hz, 2H), 6.62 (s, 1H), 2.95 – 2.83 (m, 1H), 2.22 (s, 3H), 1.22 (d,  $J = 6.8$  Hz, 6H).  $^{13}\text{C}$  NMR (100 MHz,  $\text{CDCl}_3$ )  $\delta$  138.0, 136.2, 131.3, 130.9, 130.5, 129.5, 127.8, 127.1, 125.1, 118.5, 99.4, 26.3, 23.1, 20.9. ppm; MS (EI, 70 eV)  $m/z$ : 91, 202, 340, 355. HRMS (ESI)  $m/z$ : calcd for  $\text{C}_{20}\text{H}_{21}\text{BrN}$   $[\text{M}+\text{H}]^+$ , 354.0852; found, 354.0847. IR (KBr): 2958, 2923, 2853, 1602, 1515, 1462, 1376, 821, 764, 697  $\text{cm}^{-1}$ .

### 4-Benzyl-3-bromo-2-phenyl-1-(*p*-tolyl)-1*H*-pyrrole (3ao)

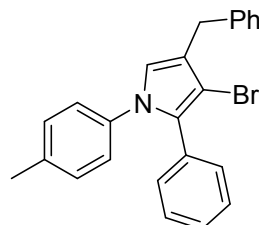

Yellow solid. M.p.: 141-142  $^{\circ}\text{C}$ .  $^1\text{H}$  NMR (400 MHz,  $\text{CDCl}_3$ )  $\delta$  7.35 – 7.29 (m, 4H), 7.25 – 7.21 (m, 6H), 7.01 (d,  $J = 7.8$  Hz, 2H), 6.89 (d,  $J = 7.9$  Hz, 2H), 6.54 (s, 1H), 3.89 (s, 2H), 2.28 (s, 3H).  $^{13}\text{C}$  NMR (100 MHz,  $\text{CDCl}_3$ )  $\delta$  140.5, 137.8, 136.4, 131.1, 130.6, 130.4, 129.5, 128.9, 128.4, 127.9, 127.2, 126.02, 125.1, 123.7, 121.2, 100.1, 32.7, 20.9 ppm; MS (EI, 70 eV)  $m/z$ : 91, 202, 322, 403. HRMS (ESI)  $m/z$ : calcd for  $\text{C}_{24}\text{H}_{20}\text{BrNNa}$   $[\text{M}+\text{H}]^+$ , 424.0671; found, 424.0671. IR (KBr): 3029, 2919, 2850, 1605, 1514, 1463, 1368, 698  $\text{cm}^{-1}$ .

### 3-Bromo-4-methyl-1,2-di-*p*-tolyl-1*H*-pyrrole (3ba)

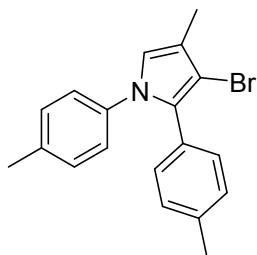

Yellow oil.  $^1\text{H}$  NMR (400 MHz,  $\text{CDCl}_3$ )  $\delta$  7.15 – 7.03 (m, 6H), 6.94 (d,  $J = 8.0$  Hz, 2H), 6.74 (s, 1H), 2.32 (s, 6H), 2.17 (s, 3H).  $^{13}\text{C}$  NMR (100 MHz,  $\text{CDCl}_3$ )  $\delta$  137.9, 136.9, 136.2, 130.5, 130.2, 129.5, 128.7, 128.4, 125.1, 120.3, 119.4, 100.7, 21.3, 20.9, 11.3 ppm; MS (EI, 70 eV)  $m/z$ : 91, 128, 260, 339. HRMS (ESI)  $m/z$ : calcd for  $\text{C}_{19}\text{H}_{18}\text{BrNNa}$   $[\text{M}+\text{H}]^+$ , 362.0515; found, 362.0518. IR (KBr): 3030, 2922, 2857, 1695, 1611, 1514, 1356, 1042, 820  $\text{cm}^{-1}$

### 3-Bromo-2-(4-ethylphenyl)-4-methyl-1-(*p*-tolyl)-1*H*-pyrrole (3ca)

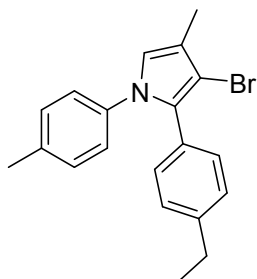

Yellow oil.  $^1\text{H}$  NMR (400 MHz,  $\text{CDCl}_3$ )  $\delta$  7.18 – 7.05 (m, 6H), 6.95 (d,  $J = 7.8$  Hz, 2H), 6.75 (s, 1H), 2.65 (q,  $J = 7.6$  Hz, 2H), 2.34 (s, 3H), 2.18 (s, 3H), 1.25 (t,  $J = 7.6$  Hz, 3H).  $^{13}\text{C}$  NMR (100 MHz,  $\text{CDCl}_3$ )  $\delta$  143.0, 137.9, 136.2, 130.5, 130.2, 129.5, 128.5, 127.4, 125.1, 120.3, 119.4, 100.7, 28.6, 20.9, 15.1, 11.3 ppm; MS (EI, 70 eV)  $m/z$ : 91, 128, 274, 353. HRMS (ESI)  $m/z$ : calcd for  $\text{C}_{20}\text{H}_{20}\text{BrNNa}$   $[\text{M}+\text{H}]^+$ , 376.0671; found, 376.0674. IR (KBr): 3030, 2965, 2926, 1687, 1611, 1515, 1457, 1357, 1043, 828  $\text{cm}^{-1}$ .

### 3-Bromo-2-(4-ethoxyphenyl)-4-methyl-1-(*p*-tolyl)-1*H*-pyrrole (3da)

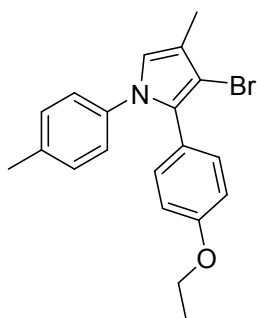

White solid. M.p.: 129-130 °C.  $^1\text{H}$  NMR (400 MHz,  $\text{CDCl}_3$ )  $\delta$  7.03 (d,  $J = 7.8$  Hz, 2H), 6.96 (d,  $J = 7.5$  Hz, 2H), 6.84 (d,  $J = 7.4$  Hz, 2H), 6.70 (d,  $J = 7.6$  Hz, 2H), 6.63 (s, 1H), 3.92 (q,  $J = 6.5$  Hz, 2H), 2.22 (s, 3H), 2.06 (s, 3H), 1.31 (t,  $J = 6.7$  Hz, 3H).  $^{13}\text{C}$  NMR (100 MHz,  $\text{CDCl}_3$ )  $\delta$  158.1, 137.9, 136.2, 131.6, 130.4, 129.5, 125.1, 123.6, 119.9, 119.2, 113.9, 100.5, 63.3, 20.9, 14.9, 11.3 ppm; MS (EI, 70 eV)  $m/z$ : 91, 115,

262, 290, 342, 269. HRMS (ESI)  $m/z$ : calcd for  $C_{20}H_{21}BrNO$   $[M+H]^+$ , 370.0801; found, 370.0801. IR (KBr): 3036, 2978, 2925, 1693, 1610, 1518, 1475, 1392, 1245, 1044, 827  $cm^{-1}$ .

### 3-Bromo-2-(4-fluorophenyl)-4-methyl-1-(*p*-tolyl)-1*H*-pyrrole (3ea)

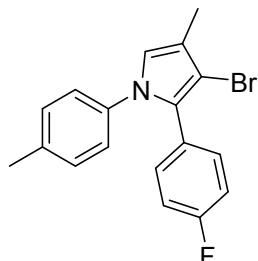

Yellow oil.  $^1H$  NMR (400 MHz,  $CDCl_3$ )  $\delta$  7.09 (dd,  $J = 7.4, 5.9$  Hz, 2H), 6.97 (d,  $J = 7.8$  Hz, 2H), 6.84 (dd,  $J = 20.4, 8.2$  Hz, 4H), 6.64 (s, 1H), 2.23 (s, 3H), 2.06 (s, 3H).  $^{13}C$  NMR (100 MHz,  $CDCl_3$ )  $\delta$  161.9 (d,  $J = 245$  Hz), 137.7, 136.5, 132.06 (d,  $J = 8.1$  Hz), 129.6, 129.5, 127.4 (d,  $J = 3$  Hz), 125.2, 120.6, 119.4, 115.0 (d,  $J = 22$  Hz), 114.9, 100.9, 20.9, 11.2 ppm; MS (EI, 70 eV)  $m/z$ : 91, 146, 264, 343. HRMS (ESI)  $m/z$ : calcd for  $C_{18}H_{16}BrFN$   $[M+H]^+$ , 344.0445; found, 344.0449. IR (KBr): 2924, 2855, 1691, 1603, 1513, 1357, 1228, 835  $cm^{-1}$ .

### 3-Bromo-2-(4-chlorophenyl)-4-methyl-1-(*p*-tolyl)-1*H*-pyrrole (3fa)

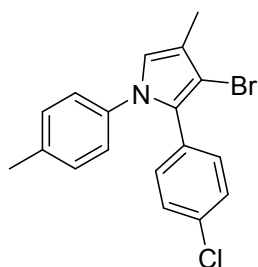

Orange solid. M.p.: 163-164  $^{\circ}C$ .  $^1H$  NMR (400 MHz,  $CDCl_3$ )  $\delta$  7.23 (d,  $J = 8.0$  Hz, 2H), 7.15 (d,  $J = 8.1$  Hz, 2H), 7.08 (d,  $J = 7.9$  Hz, 2H), 6.92 (d,  $J = 7.8$  Hz, 2H), 6.75 (s, 1H), 2.33 (s, 3H), 2.15 (s, 3H).  $^{13}C$  NMR (100 MHz,  $CDCl_3$ )  $\delta$  137.6, 136.6, 133.0, 131.5, 129.8, 129.7, 129.1, 128.2, 125.2, 120.9, 119.7, 101.2, 20.9, 11.3 ppm; MS (EI, 70 eV)  $m/z$ : 91, 122, 163, 245, 280, 361. HRMS (ESI)  $m/z$ : calcd for  $C_{18}H_{15}BrClNNa$   $[M+H]^+$ , 381.9969; found, 381.9976. IR (KBr): 2923, 2856, 1653, 1514, 1464, 1407, 1356, 1092, 827  $cm^{-1}$ .

### 3-Bromo-2-(4-bromophenyl)-4-methyl-1-(*p*-tolyl)-1*H*-pyrrole (3ga)

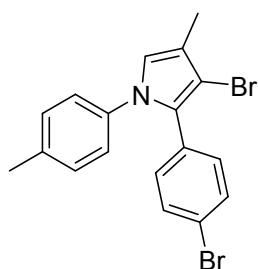

Yellow solid. M.p.: 185-187 °C. <sup>1</sup>H NMR (400 MHz, CDCl<sub>3</sub>) δ 7.38 (d, *J* = 7.9 Hz, 2H), 7.08 (d, *J* = 8.0 Hz, 4H), 6.91 (d, *J* = 7.6 Hz, 2H), 6.74 (s, 1H), 2.33 (s, 3H), 2.15 (s, 3H). <sup>13</sup>C NMR (100 MHz, CDCl<sub>3</sub>) δ 137.6, 136.7, 131.8, 131.2, 130.3, 129.7, 129.2, 125.2, 121.3, 121.0, 119.7, 101.24, 20.9, 11.2 ppm; MS (EI, 70 eV) *m/z*: 91, 122, 245, 324, 405. HRMS (ESI) *m/z*: calcd for C<sub>18</sub>H<sub>16</sub>Br<sub>2</sub>N [M+H]<sup>+</sup>, 403.9644; found, 403.9646. IR (KBr): 2923, 2853, 1652, 1613, 1513, 1462, 1358, 824 cm<sup>-1</sup>.

### 3-Bromo-2-(4-(4-ethylcyclohexyl)phenyl)-4-methyl-1-(*p*-tolyl)-1*H*-pyrrole (3ha)

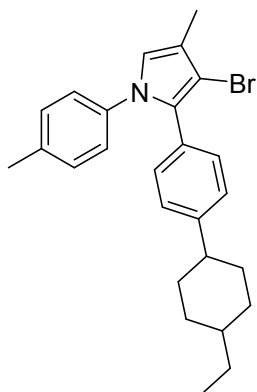

Yellow oil. <sup>1</sup>H NMR (400 MHz, CDCl<sub>3</sub>) δ 7.02 (q, *J* = 7.9 Hz, 4H), 6.95 (d, *J* = 7.8 Hz, 2H), 6.83 (d, *J* = 7.8 Hz, 2H), 6.63 (s, 1H), 2.34 (t, *J* = 12.1 Hz, 1H), 2.22 (s, 3H), 2.06 (s, 3H), 1.78 (d, *J* = 11.6 Hz, 4H), 1.33 (dd, *J* = 22.8, 12.4 Hz, 2H), 1.19 – 1.14 (m, 3H), 0.96 (dd, *J* = 18.9, 8.4 Hz, 2H), 0.83 (d, *J* = 7.1 Hz, 3H). <sup>13</sup>C NMR (100 MHz, CDCl<sub>3</sub>) δ 146.7, 137.9, 136.1, 130.6, 130.1, 129.5, 128.6, 126.3, 125.1, 120.3, 119.4, 100.7, 44.3, 39.1, 34.2, 33.2, 30.0, 20.9, 11.5, 11.3 ppm; MS (EI, 70 eV) *m/z*: 128, 203, 293, 372. HRMS (ESI) *m/z*: calcd for C<sub>26</sub>H<sub>30</sub>BrNNa [M+H]<sup>+</sup>, 458.1454; found, 458.1455. IR (KBr): 2922, 2851, 1694, 1614, 1515, 1454, 1357, 825 cm<sup>-1</sup>.

### 3-Bromo-4-methyl-2-(*m*-tolyl)-1-(*p*-tolyl)-1*H*-pyrrole (3ia)

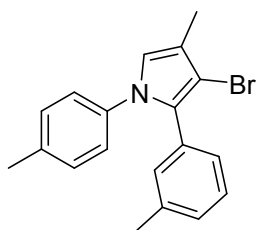

Yellow oil. <sup>1</sup>H NMR (400 MHz, CDCl<sub>3</sub>) δ 7.05 – 6.98 (m, 2H), 6.94 (d, *J* = 6.9 Hz, 3H), 6.84 (t, *J* = 10.9 Hz, 3H), 6.63 (s, 1H), 2.20 (s, 3H), 2.17 (s, 3H), 2.06 (s, 3H). <sup>13</sup>C NMR (100 MHz, CDCl<sub>3</sub>) δ 137.9, 137.4, 136.2, 131.3, 131.1, 130.6, 129.5, 127.9, 127.8, 127.5, 125.1, 120.4, 119.4, 100.9, 21.4, 20.9, 11.3 ppm; MS (EI, 70 eV) *m/z*: 91, 115, 245, 260, 341. HRMS (ESI) *m/z*: calcd for C<sub>19</sub>H<sub>18</sub>BrNNa [M+H]<sup>+</sup>, 362.0515; found, 362.0518. IR (KBr): 3034, 2922, 2857, 1690, 1609, 1514, 1454, 1357, 1043 cm<sup>-1</sup>.

### 3-Bromo-2-(3-chlorophenyl)-4-methyl-1-(*p*-tolyl)-1*H*-pyrrole (3ja)

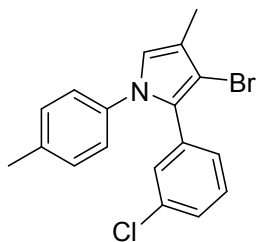

Red oil.  $^1\text{H}$  NMR (400 MHz,  $\text{CDCl}_3$ )  $\delta$  7.27 (s, 3H), 7.16 (dd,  $J = 18.7, 7.9$  Hz, 2H), 7.07 (d,  $J = 7.7$  Hz, 2H), 7.01 (d,  $J = 7.4$  Hz, 1H), 6.91 (d,  $J = 7.6$  Hz, 2H), 6.74 (s, 1H), 2.32 (s, 3H), 2.14 (s, 3H).  $^{13}\text{C}$  NMR (100 MHz,  $\text{CDCl}_3$ )  $\delta$  137.5, 136.7, 133.7, 133.1, 130.2, 129.7, 129.1, 128.9, 128.5, 127.2, 125.2, 121.2, 119.7, 101.5, 20.9, 11.2 ppm; MS (EI, 70 eV)  $m/z$ : 91, 115, 163, 245, 280, 361. HRMS (ESI)  $m/z$ : calcd for  $\text{C}_{18}\text{H}_{16}\text{BrClN}$   $[\text{M}+\text{H}]^+$ , 360.0149; found, 360.0144. IR (KBr): 2924, 2854, 1693, 1600, 1514, 1461, 1356, 1044  $\text{cm}^{-1}$ .

### 3-Bromo-2-(2-fluorophenyl)-4-methyl-1-(p-tolyl)-1H-pyrrole (3ka)

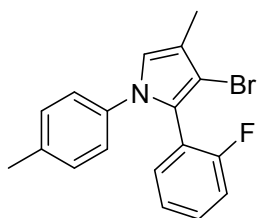

Yellow solid. M.p.: 148-150 °C  $^1\text{H}$  NMR (400 MHz,  $\text{CDCl}_3$ )  $\delta$  7.35 – 7.28 (m, 2H), 7.13 (t,  $J = 7.5$  Hz, 1H), 7.06 (d,  $J = 7.7$  Hz, 2H), 6.99 (dd,  $J = 17.9, 8.4$  Hz, 3H), 6.82 (s, 1H), 2.32 (s, 3H), 2.19 (s, 3H).  $^{13}\text{C}$  NMR (100 MHz,  $\text{CDCl}_3$ )  $\delta$  160.0 (d,  $J = 247$  Hz), 158.8, 137.8, 136.4, 132.9 (d,  $J = 2.6$  Hz), 129.9 (d,  $J = 8.1$  Hz, ), 129.5, 124.9, 124.4, 124.3, 123.7 (d,  $J = 3.6$  Hz, ), 120.6, 119.8, 119.7, (d,  $J = 16$  Hz), 115.70 (d,  $J = 22.0$  Hz, ), 102.28 (s, 5H), 20.94 (s, 4H), 11.22 (s, 3H). ppm; MS (EI, 70 eV)  $m/z$ : 91, 146, 249, 264, 343. HRMS (ESI)  $m/z$ : calcd for  $\text{C}_{18}\text{H}_{16}\text{BrFN}$   $[\text{M}+\text{H}]^+$ , 344.0445; found, 344.0449. IR (KBr): 2924, 2854, 1692, 1611, 1515, 1455, 1358, 1043, 756  $\text{cm}^{-1}$ .

### 3-Bromo-2-(2,4-dimethylphenyl)-4-methyl-1-(p-tolyl)-1H-pyrrole (3la)

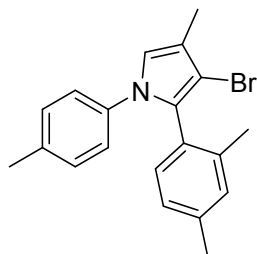

Yellow solid. M.p.: 148-150 °C.  $^1\text{H}$  NMR (400 MHz,  $\text{CDCl}_3$ )  $\delta$  7.07 (d,  $J = 8.0$  Hz, 1H), 7.00 (d,  $J = 7.7$  Hz, 2H), 6.96 (s, 2H), 6.89 (d,  $J = 7.7$  Hz, 2H), 6.77 (s, 1H), 2.31 (s, 3H), 2.28 (s, 3H), 2.16 (s, 3H), 1.98 (s, 3H).  $^{13}\text{C}$  NMR (100 MHz,  $\text{CDCl}_3$ )  $\delta$  138.2, 138.1, 138.0, 135.8, 131.8, 130.7, 130.5, 129.4, 128.5, 126.2, 124.1, 119.0, 118.9, 101.5, 21.3, 20.9, 19.8, 11.3 ppm; MS (EI, 70 eV)  $m/z$ : 91, 274, 355. HRMS

(ESI)  $m/z$ : calcd for  $C_{20}H_{21}BrN$   $[M+H]^+$ , 354.0852; found, 354.0856. IR (KBr): 2922, 2856, 1612, 1515, 1448, 1393, 1354, 1043, 821  $cm^{-1}$ .

### 3-bromo-4-methyl-2-(thiophen-3-yl)-1-(*p*-tolyl)-1*H*-pyrrole (3ma)

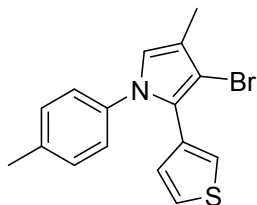

Orange solid. M.p.: 137-138°C.  $^1H$  NMR (400 MHz,  $CDCl_3$ )  $\delta$  7.15 (s, 2H), 7.08 (d,  $J = 7.8$  Hz, 2H), 6.96 (d,  $J = 7.8$  Hz, 2H), 6.85 (d,  $J = 4.4$  Hz, 1H), 6.69 (s, 1H), 2.33 (s, 3H), 2.13 (s, 3H).  $^{13}C$  NMR (100 MHz,  $CDCl_3$ )  $\delta$  137.9, 136.7, 131.3, 129.6, 128.7, 126.3, 125.3, 124.3, 120.4, 119.5, 100.8, 21.0, 11.3 ppm; MS (EI, 70 eV)  $m/z$ : 91, 118, 237, 252, 333. HRMS (ESI)  $m/z$ : calcd for  $C_{16}H_{14}BrNNaS$   $[M+H]^+$ , 353.9923; found, 353.9935. IR (KBr): 2922, 2853, 1658, 1514, 1414, 1355, 1044, 784  $cm^{-1}$ .

### Ethyl 4-methyl-2-phenyl-1-(*p*-tolyl)-1*H*-pyrrole-3-carboxylate (5a)

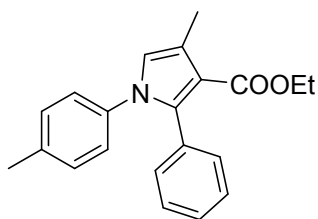

Yellow solid. M.p.: 97-98°C.  $^1H$  NMR (400 MHz,  $CDCl_3$ )  $\delta$  7.15 – 7.09 (m, 5H), 6.91 (d,  $J = 7.9$  Hz, 2H), 6.80 (d,  $J = 7.9$  Hz, 2H), 6.57 (s, 1H), 4.03 (q,  $J = 7.1$  Hz, 2H), 2.27 (s, 3H), 2.18 (s, 3H), 1.00 (t,  $J = 7.1$  Hz, 3H).  $^{13}C$  NMR (100 MHz,  $CDCl_3$ )  $\delta$  165.6, 138.2, 137.0, 136.8, 132.3, 131.2, 129.4, 127.5, 127.4, 125.8, 121.8, 121.6, 113.8, 59.3, 20.9, 14.1, 12.3 ppm; MS (EI, 70 eV)  $m/z$ : 91, 128, 274, 319. HRMS (ESI)  $m/z$ : calcd for  $C_{21}H_{21}NNaO_2$   $[M+H]^+$ , 342.1464; found, 342.1449. IR (KBr): 2977, 2923, 2854, 1699, 1604, 1516, 1477, 1410, 1256, 1086  $cm^{-1}$ .

### Ethyl 4-methyl-2-(naphthalen-2-yl)-1-(*p*-tolyl)-1*H*-pyrrole-3-carboxylate (5b)

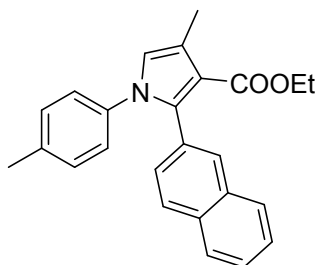

Yellow solid. M.p.: 128-130°C.  $^1H$  NMR (400 MHz,  $CDCl_3$ )  $\delta$  7.82 (d,  $J = 7.6$  Hz, 1H), 7.73 (d,  $J = 7.1$  Hz, 3H), 7.47 (dd,  $J = 11.7, 6.0$  Hz, 2H), 7.35 (d,  $J = 8.5$  Hz, 1H), 6.99 (q,  $J = 8.2$  Hz, 4H), 6.76 (s, 1H), 4.14 (q,  $J = 7.0$  Hz, 2H), 2.45 (s, 3H), 2.27 (s, 3H), 1.06 (t,  $J = 7.1$  Hz, 3H).  $^{13}C$  NMR (100 MHz,  $CDCl_3$ )  $\delta$  165.6, 137.9, 137.0,



136.8, 132.7, 132.6, 130.6, 129.8, 129.5, 128.9, 128.2, 127.6, 126.7, 126.1, 125.8, 125.7, 122.1, 121.8, 114.2, 59.3, 20.9, 14.1, 12.4 ppm; MS (EI, 70 eV)  $m/z$ : 91, 178, 296, 324, 369. HRMS (ESI)  $m/z$ : calcd for  $C_{25}H_{24}NO_2$   $[M+H]^+$ , 370.1802; found, 370.1803. IR (KBr): 2980, 2923, 2851, 1699, 1515, 1464, 1411, 1256, 1085  $cm^{-1}$

#### 4-Methyl-2-phenyl-3-(1-phenylvinyl)-1-(*p*-tolyl)-1*H*-pyrrole (9)

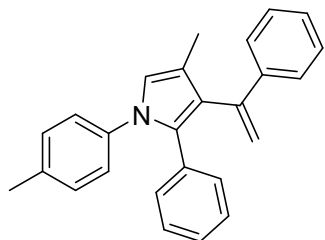

White solid. M.p.: 107-108°C.  $^1H$  NMR (400 MHz,  $CDCl_3$ )  $\delta$  7.48 (d,  $J = 7.4$  Hz, 2H), 7.32 – 7.23 (m, 4H), 7.09 – 7.08(m, 7H), 7.02 (d,  $J = 7.9$  Hz, 2H), 6.78 (s, 1H), 5.66 (s, 1H), 5.07 (s, 1H), 2.35 (s, 3H), 1.91 (s, 3H).  $^{13}C$  NMR (100 MHz,  $CDCl_3$ )  $\delta$  142.9, 141.8, 138.1, 135.7, 132.6, 131.4, 130.3, 129.4, 128.1, 127.6, 127.2, 126.8, 126.2, 125.4, 124.6, 121.0, 119.3, 116.6, 20.9, 10.8 ppm; MS (EI, 70 eV)  $m/z$ : 91, 215, 272, 334, 348. HRMS (ESI)  $m/z$ : calcd for  $C_{26}H_{24}N$   $[M+H]^+$ , 350.1903; found, 350.1899. IR (KBr): 3057, 2923, 2853, 1695, 1572, 1515, 1400, 698  $cm^{-1}$ .

#### 4-Methyl-2,3-diphenyl-1-(*p*-tolyl)-1*H*-pyrrole (10)

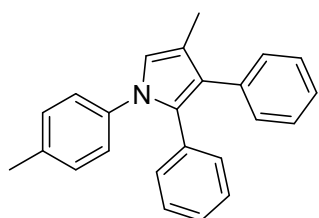

White solid. M.p.: 145-146°C.  $^1H$  NMR (400 MHz,  $CDCl_3$ )  $\delta$  7.25– 7.22 (m, 2H), 7.16– 7.14 (m, 3H), 7.08– 7.03(m, , 5H), 6.97– 76.93 (m, 4H), 6.80 (s, 1H), 2.31 (s, 3H), 2.16 (s, 3H).  $^{13}C$  NMR (100 MHz,  $CDCl_3$ )  $\delta$  137.9, 136.1, 135.8, 132.4, 130.8, 130.45, 130.4, 129.4, 127.8, 127.7, 126.3, 125.6, 125.5, 124.6, 121.5, 118.5, 20.9, 11.0 ppm; MS (EI, 70 eV)  $m/z$ : 91, 145, 191, 205, 323. HRMS (ESI)  $m/z$ : calcd for  $C_{24}H_{22}N$   $[M+H]^+$ , 324.1747; found, 324.1743. IR (KBr): 3058, 2922, 2853, 1601, 1516, 1369, 698  $cm^{-1}$ .

## E. NMR Spectra

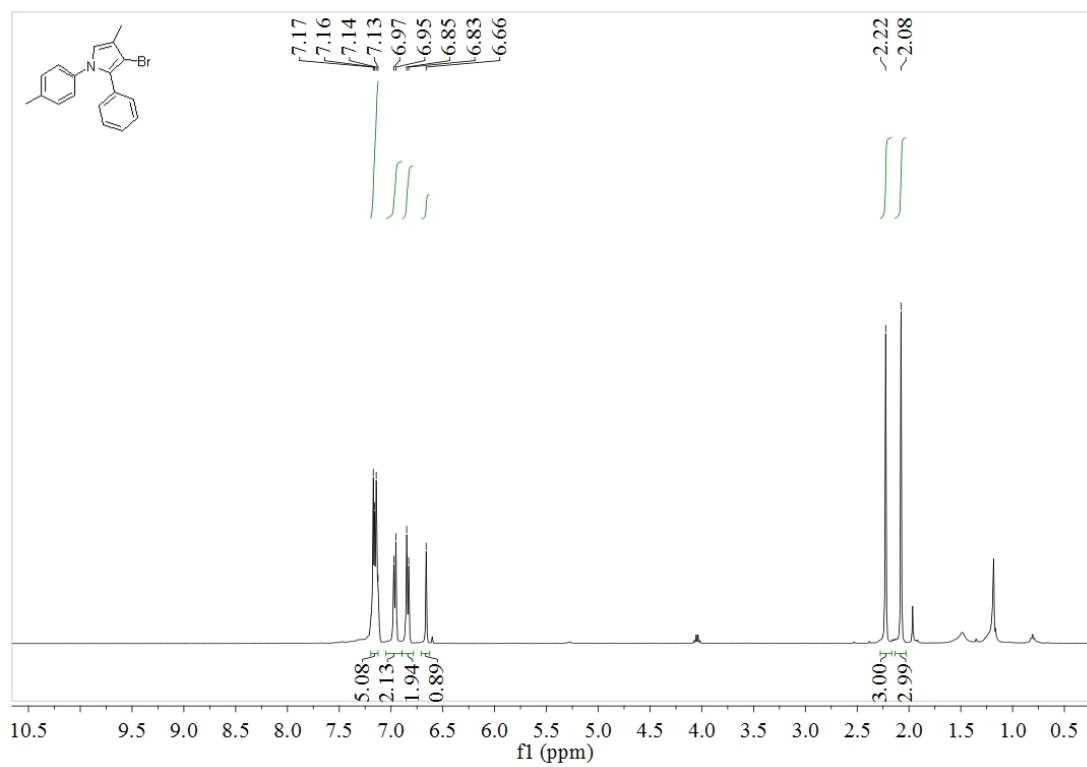

## 3aa-<sup>1</sup>H

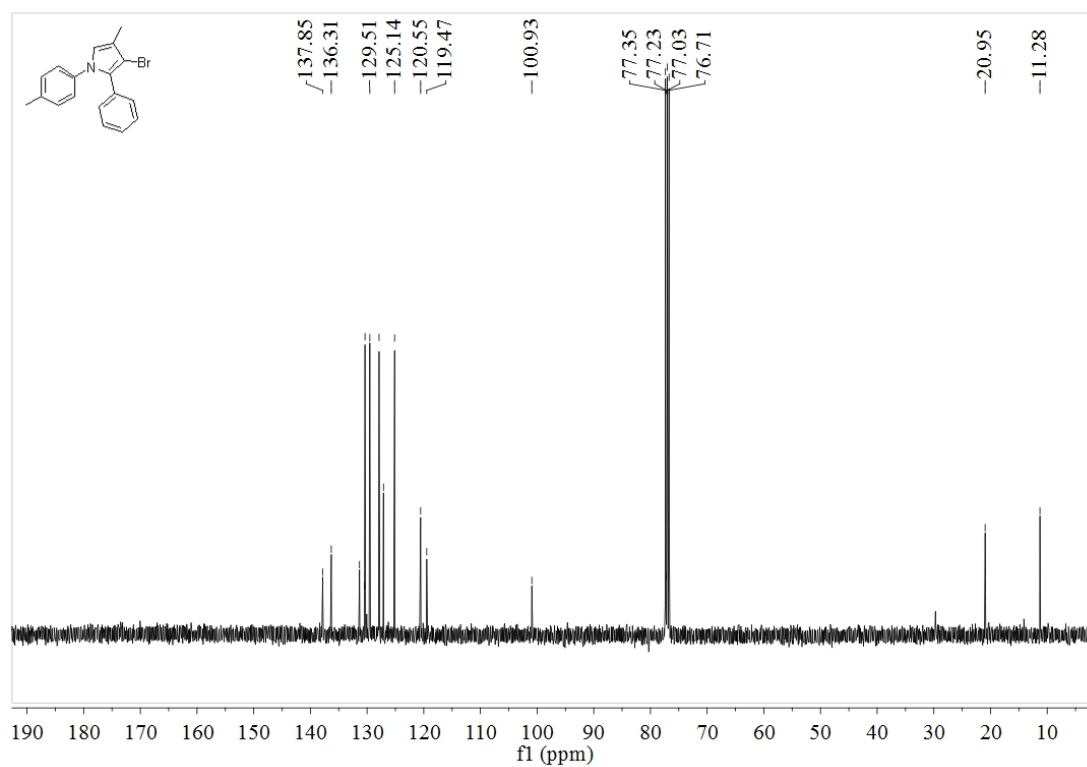

## 3aa-<sup>13</sup>C

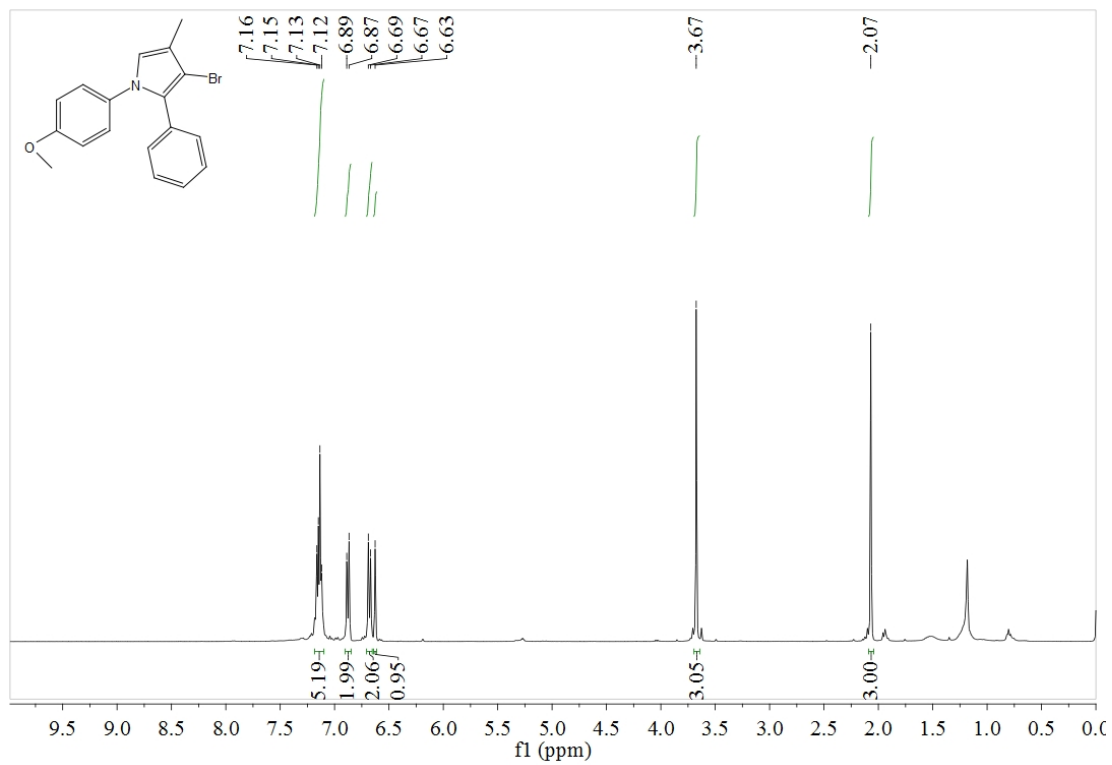

**3ab-<sup>1</sup>H**

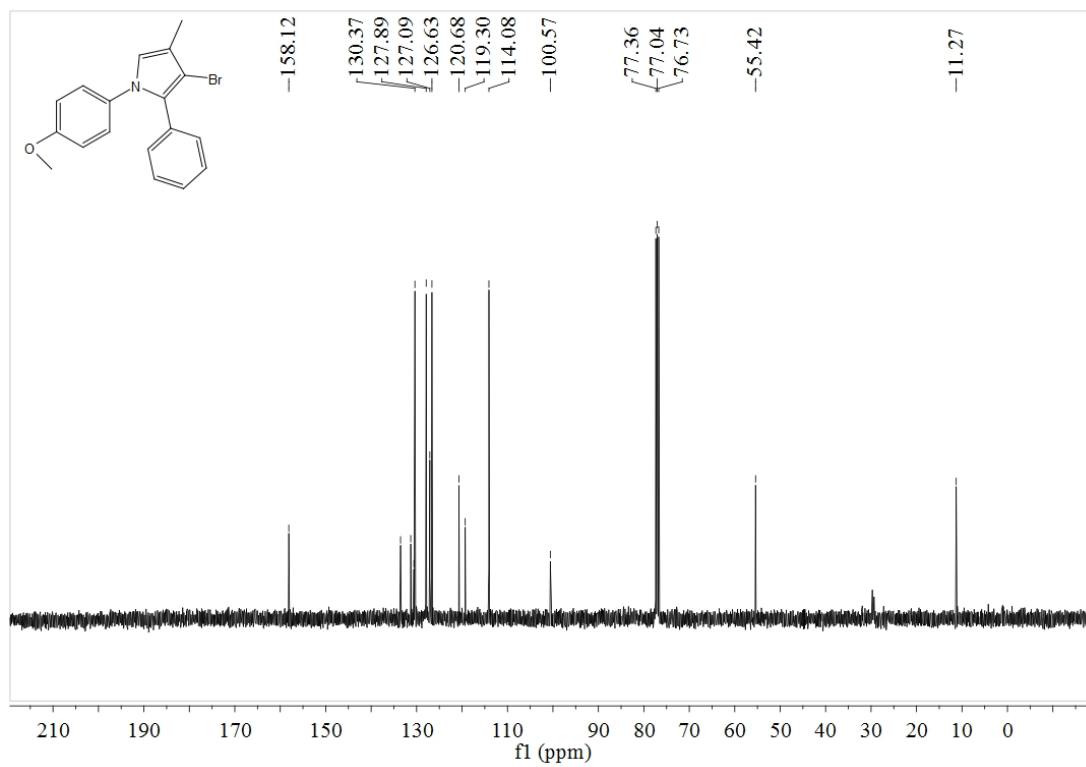

**3ab-<sup>13</sup>C**

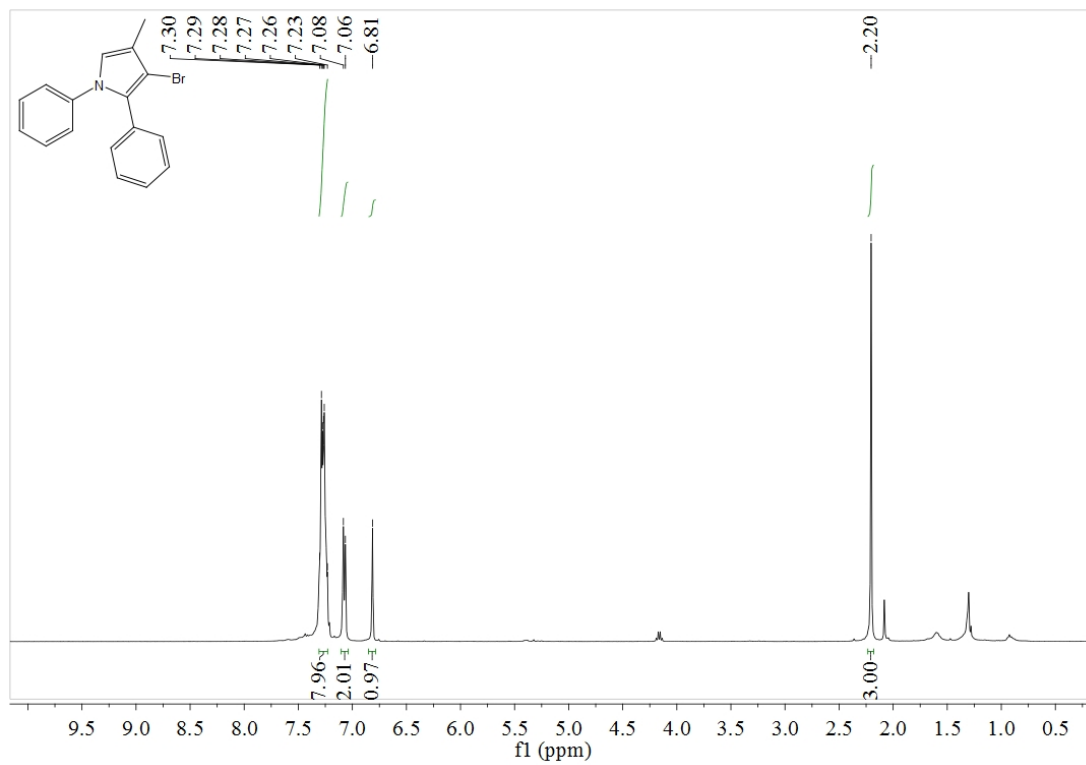

**3ac-<sup>1</sup>H**

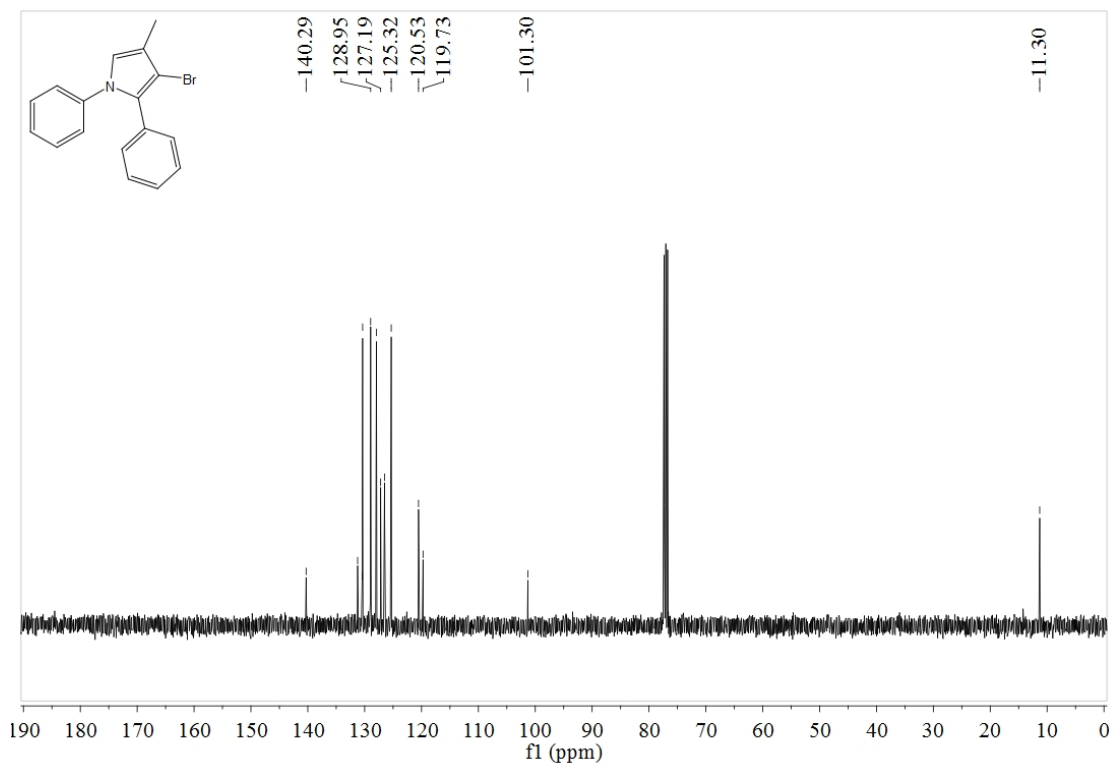

**3ac-<sup>13</sup>C**

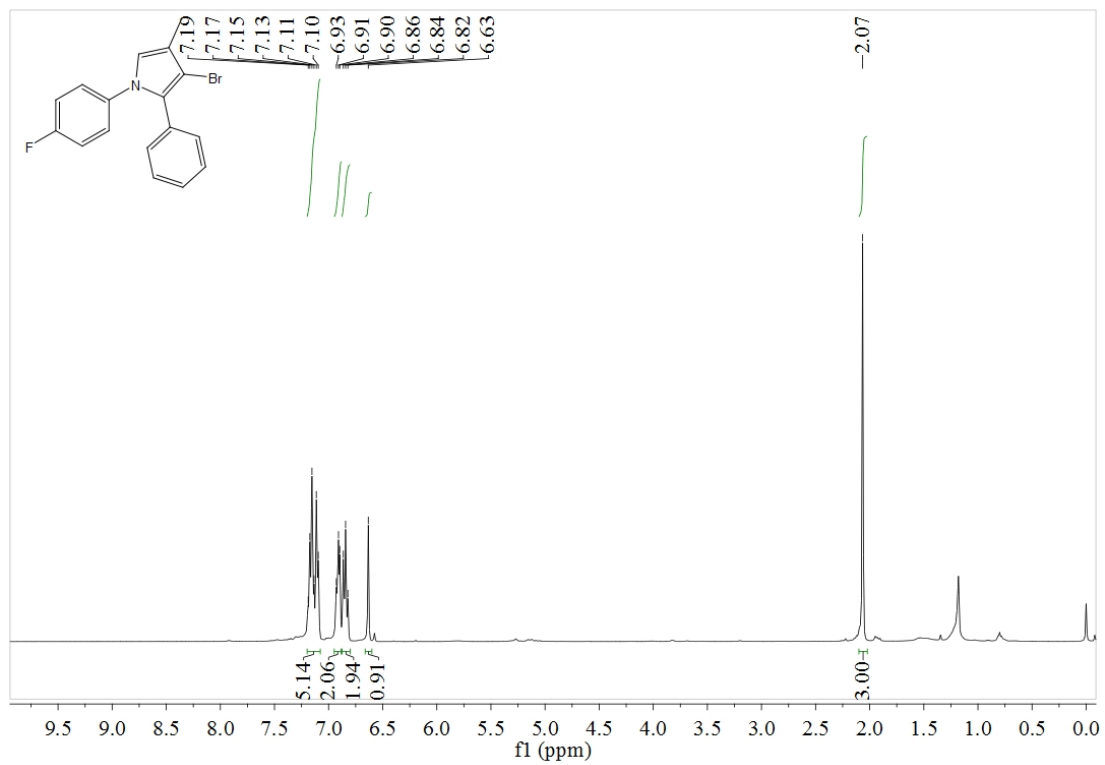

**3ad-<sup>1</sup>H**

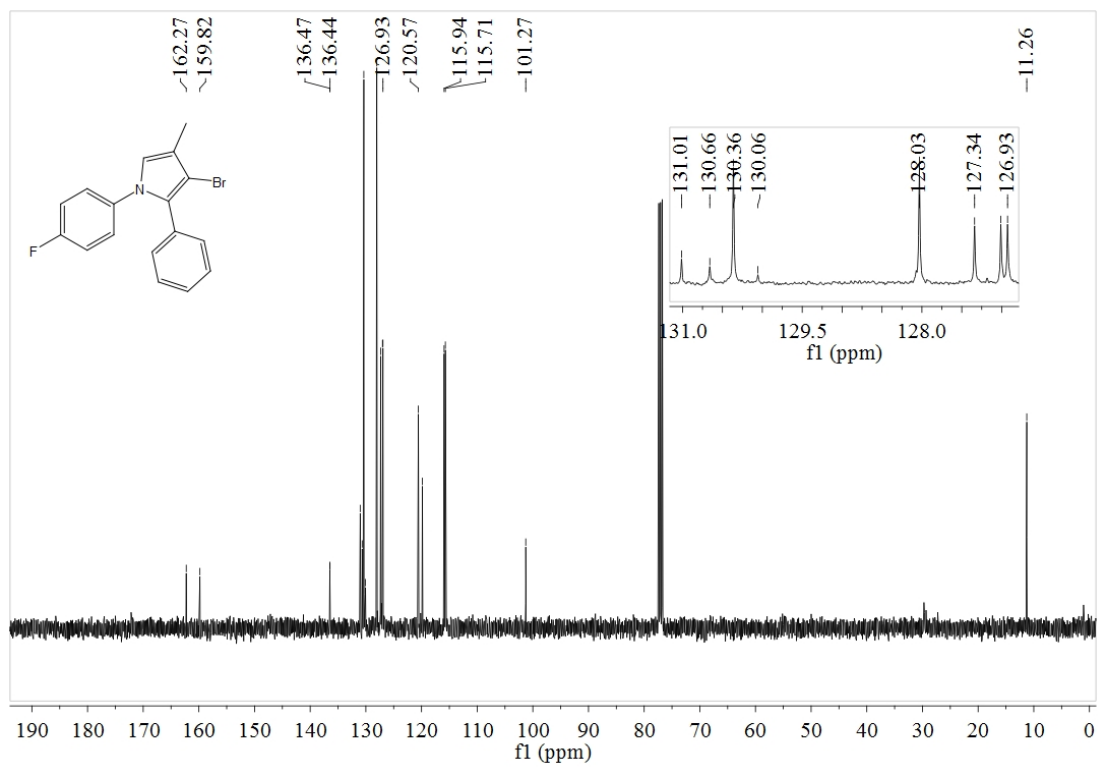

**3ad-<sup>13</sup>C**

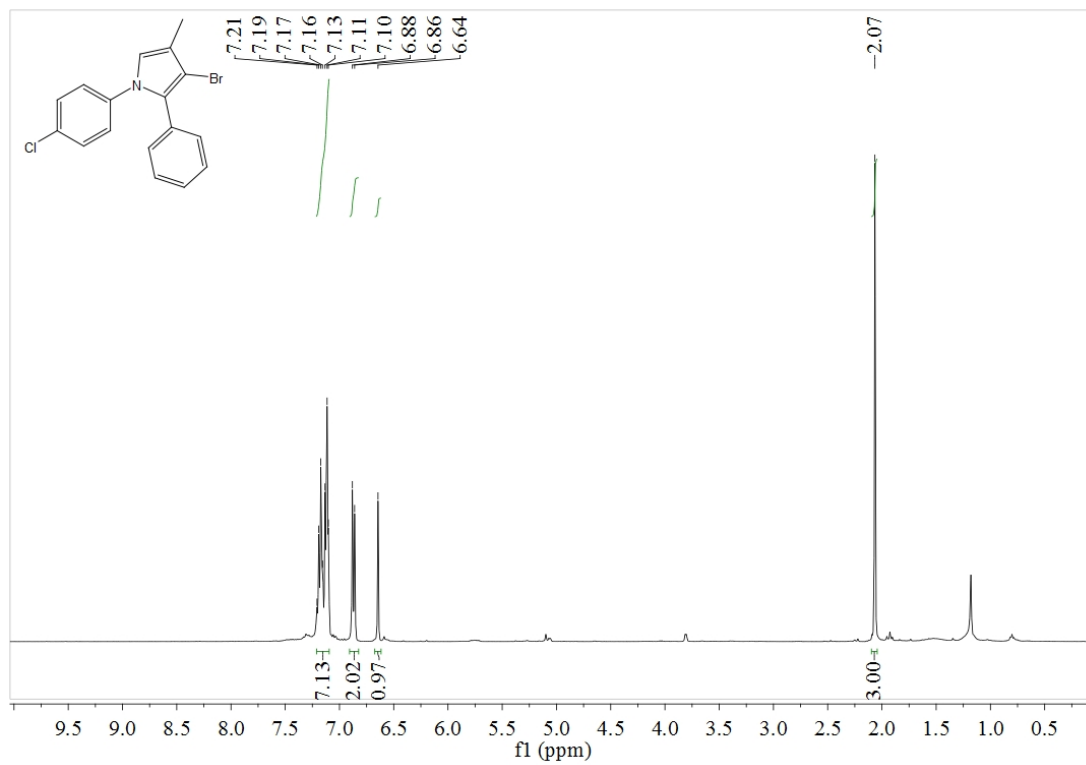

**3ae- $^1\text{H}$**

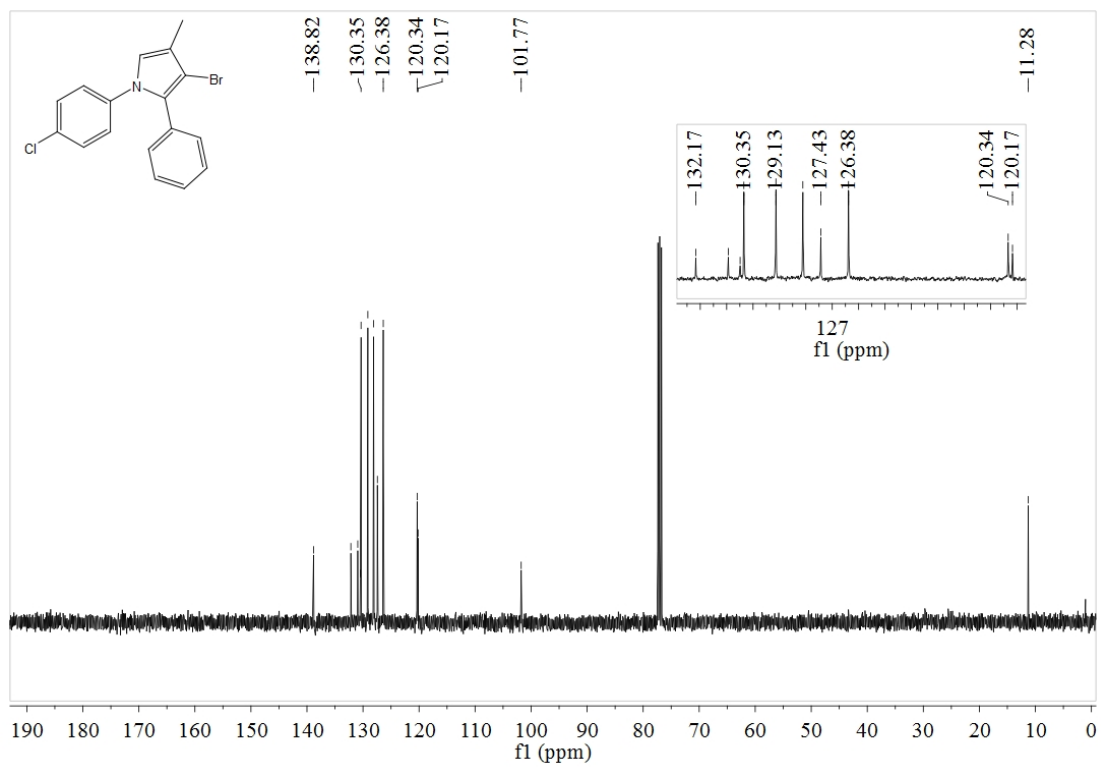

**3ae- $^{13}\text{C}$**

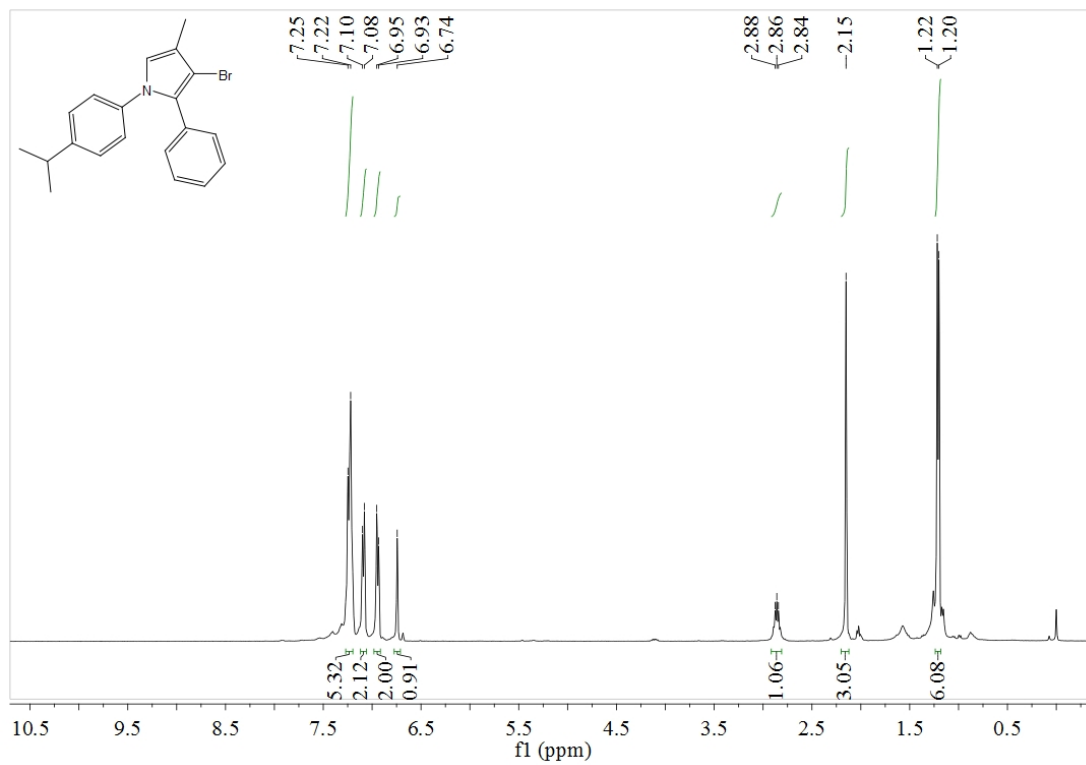

**3af-<sup>1</sup>H**

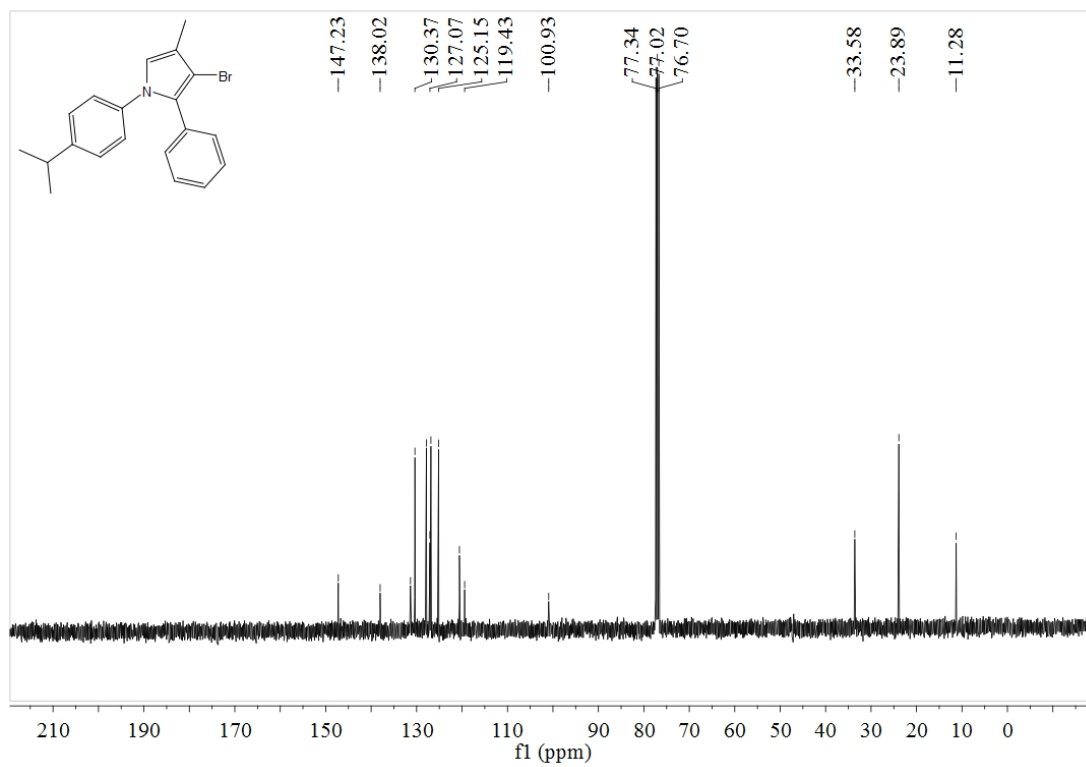

**3af-<sup>13</sup>C**

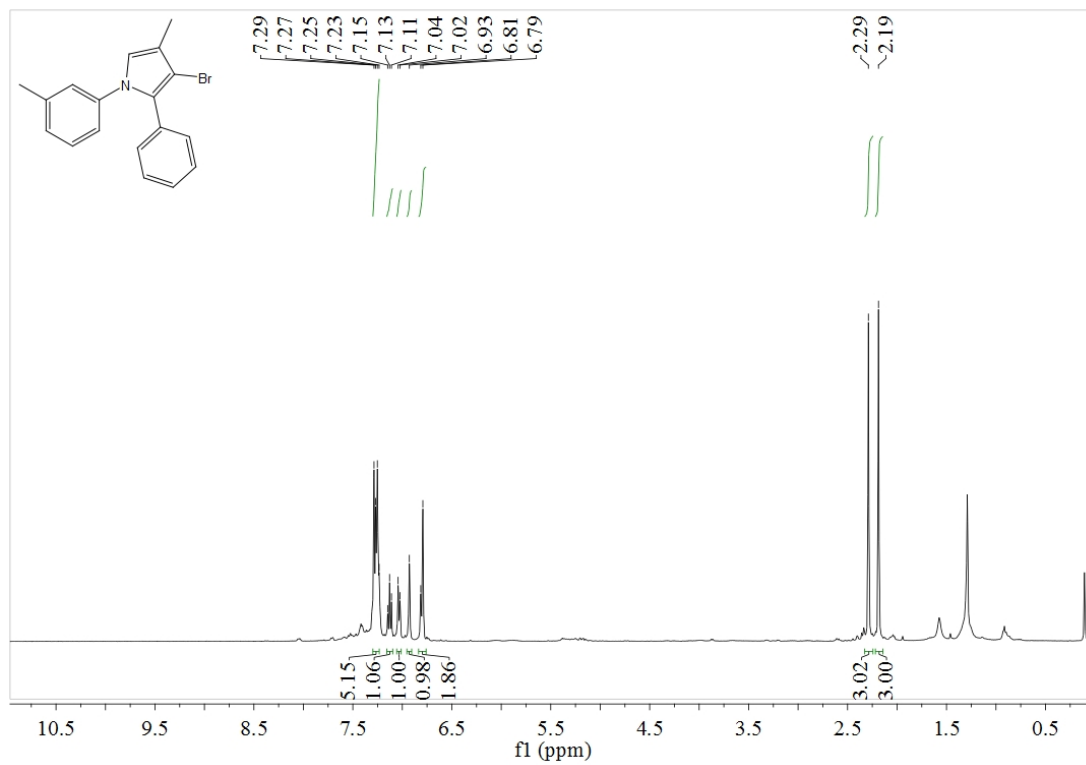

**3ag-<sup>1</sup>H**

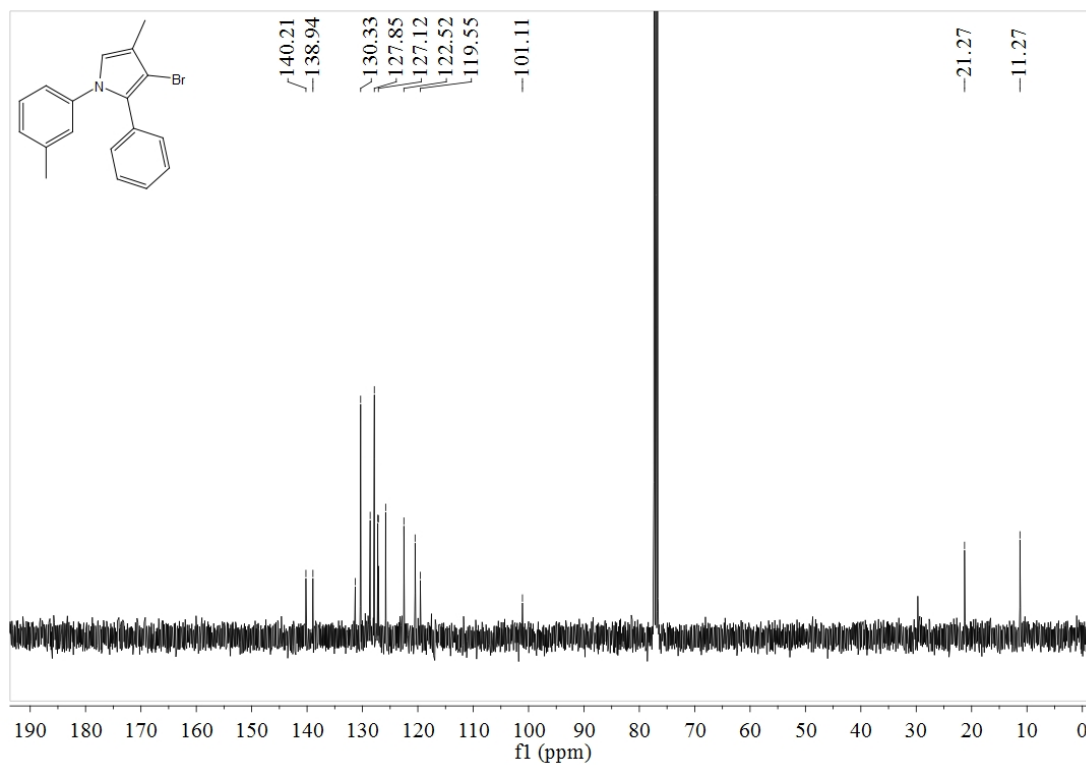

**3ag-<sup>13</sup>C**



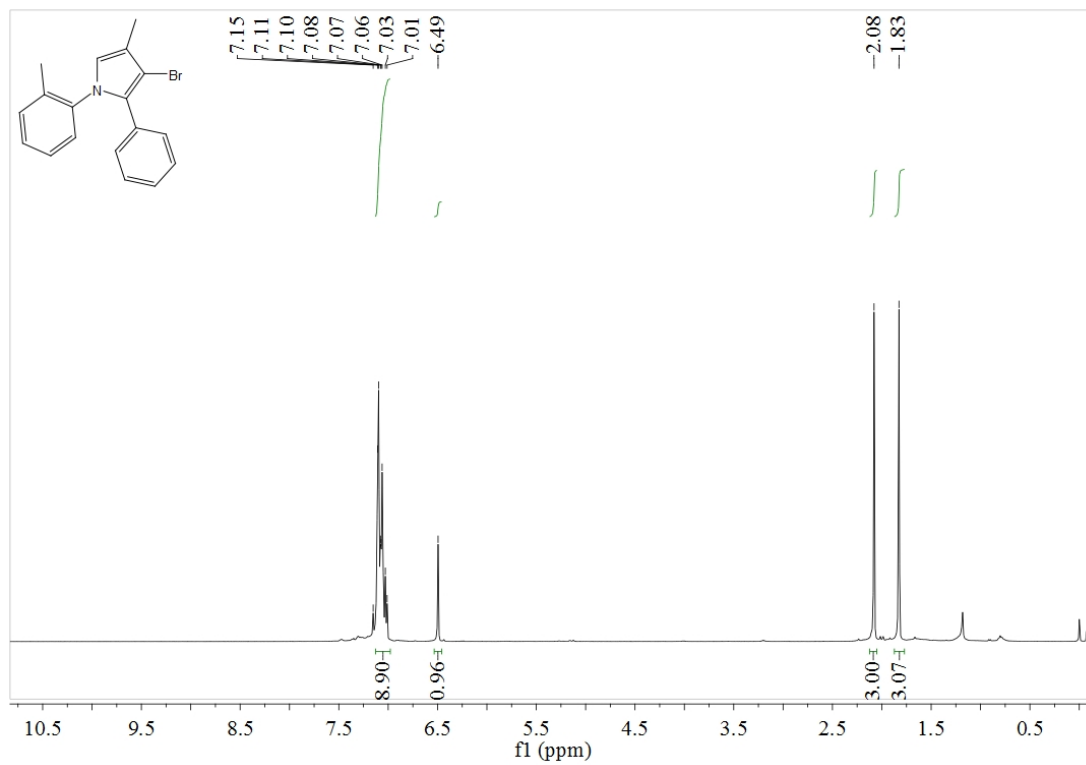

**3ah-<sup>1</sup>H**

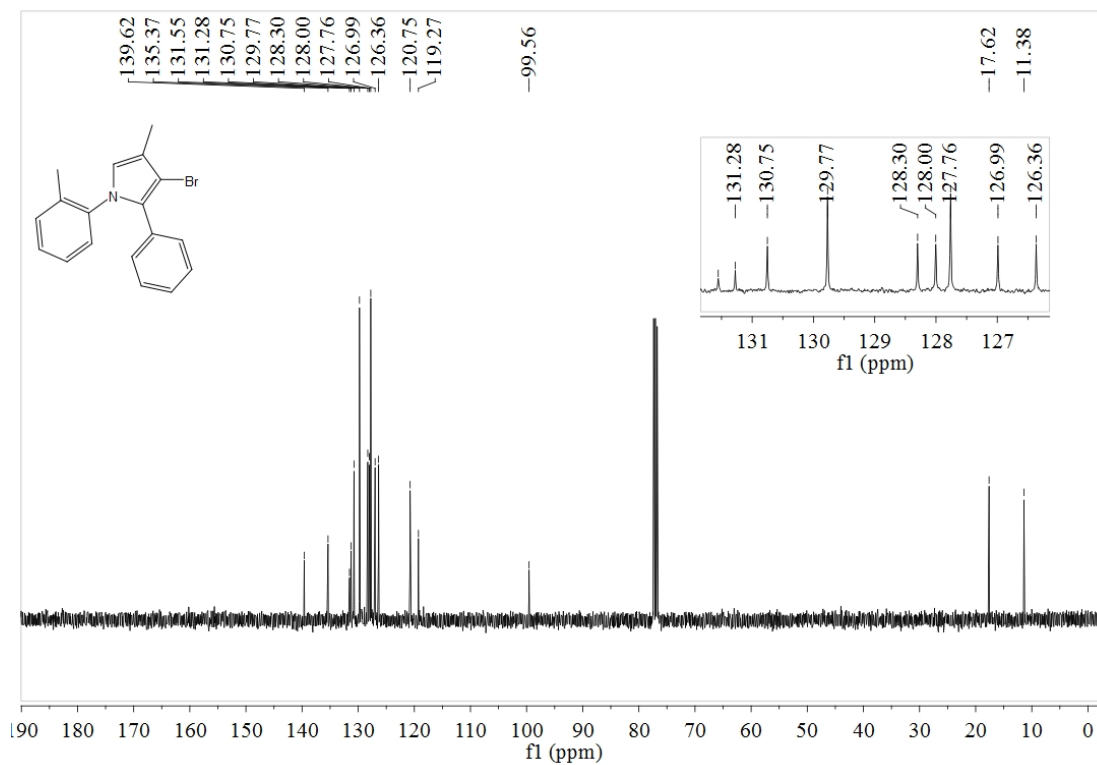

**3ah-<sup>13</sup>C**

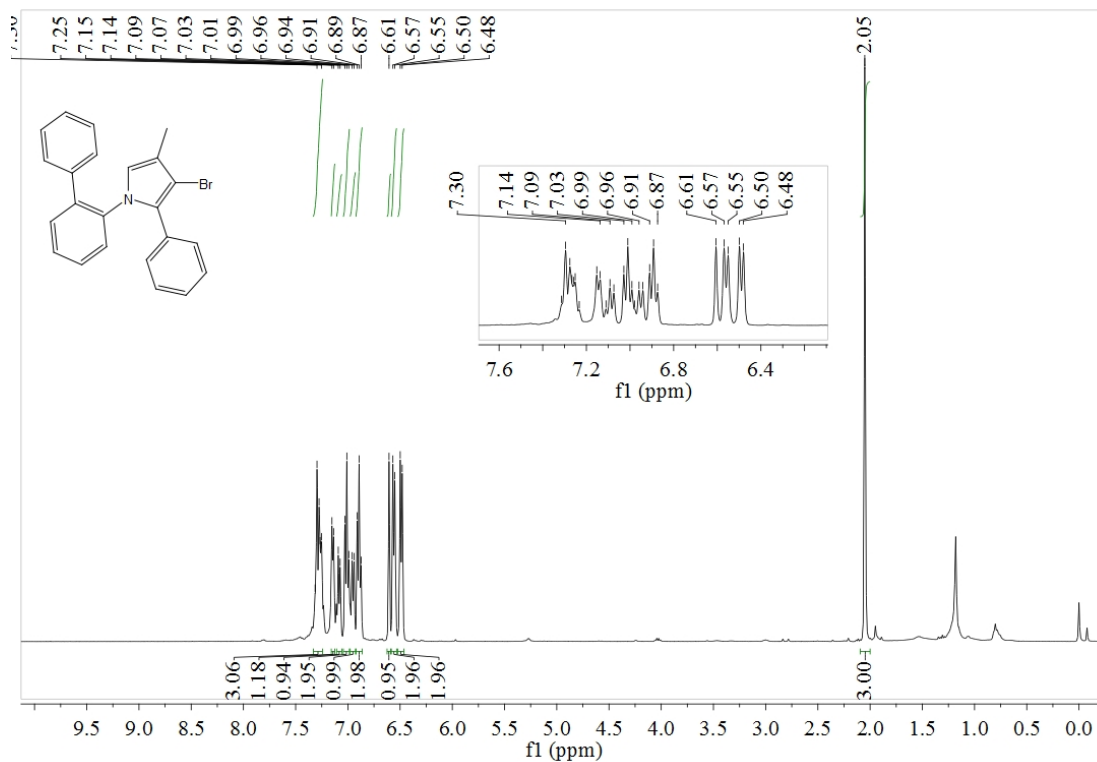

**3ai-<sup>1</sup>H**

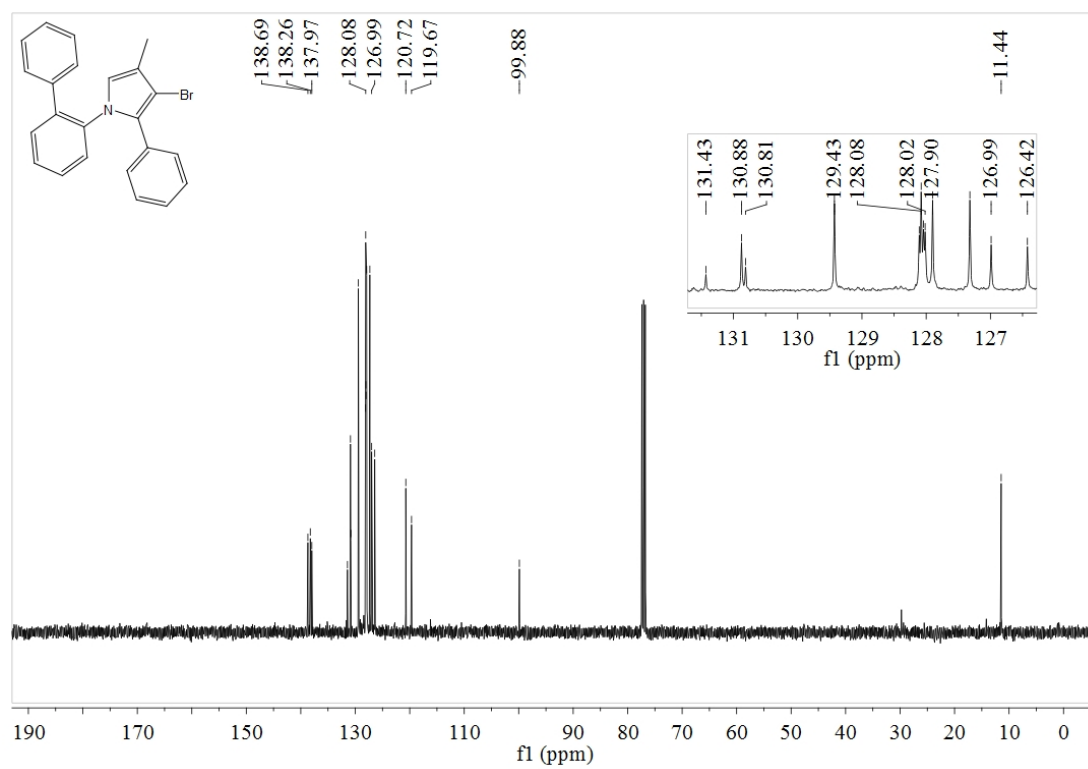

**3ai-<sup>13</sup>C**

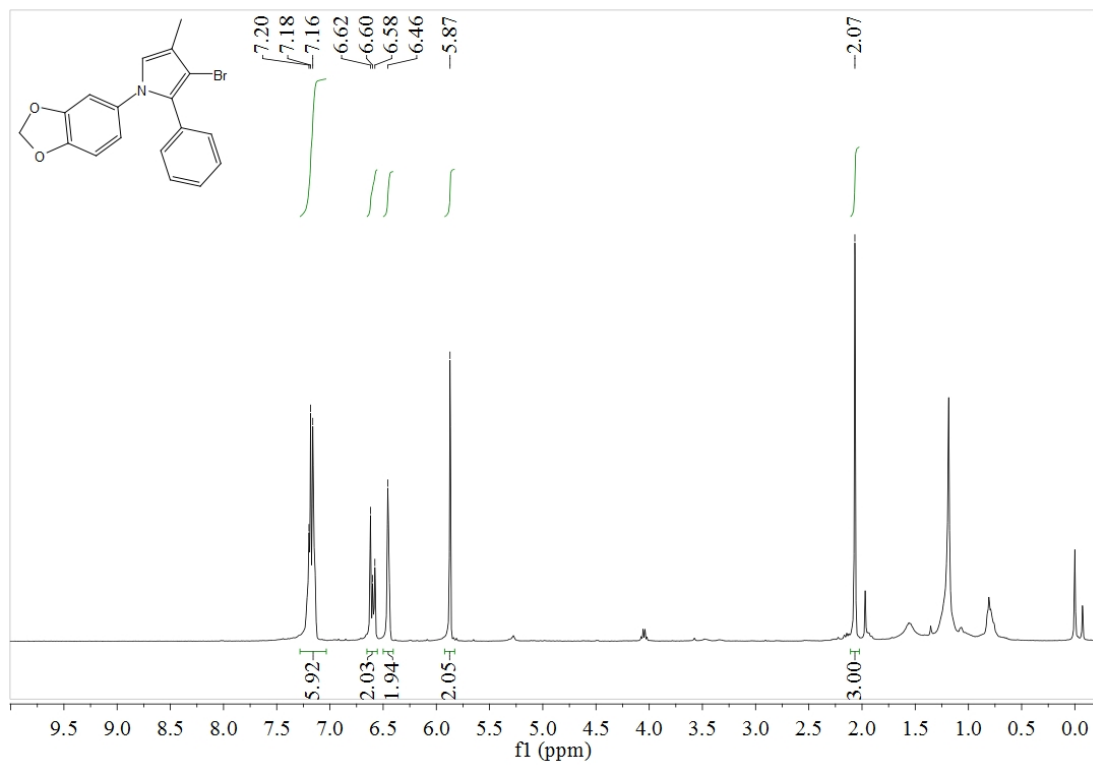

**3aj-<sup>1</sup>H**

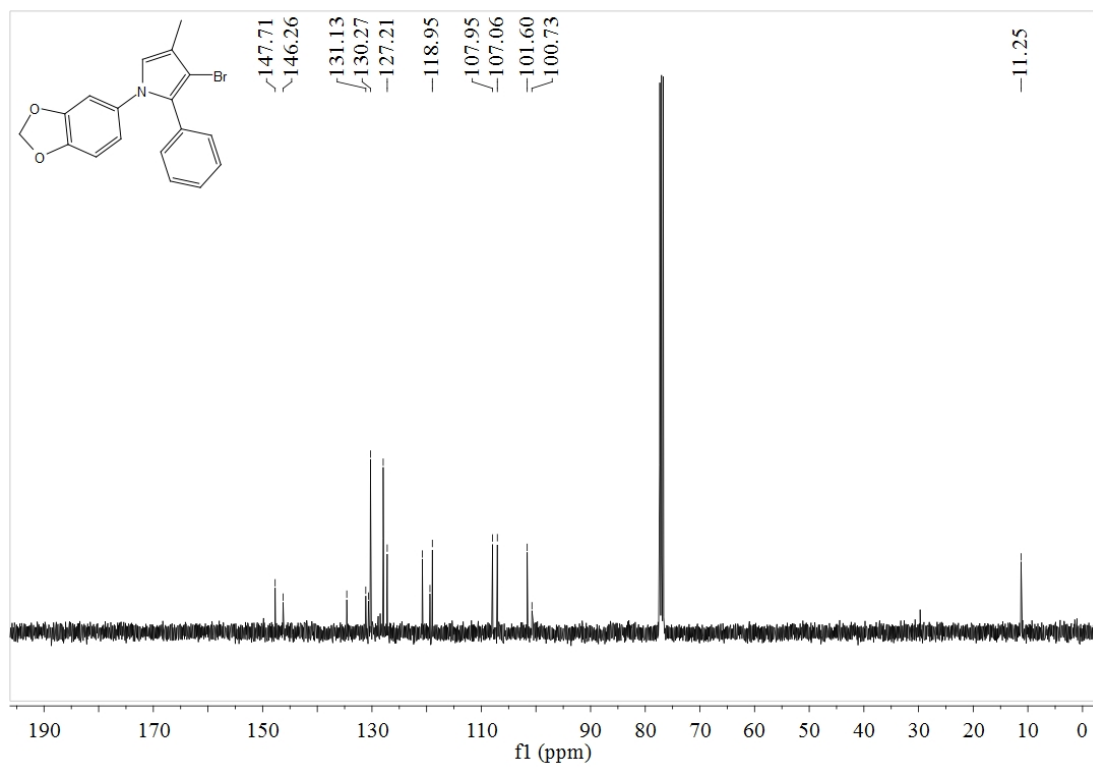

**3aj-<sup>13</sup>C**

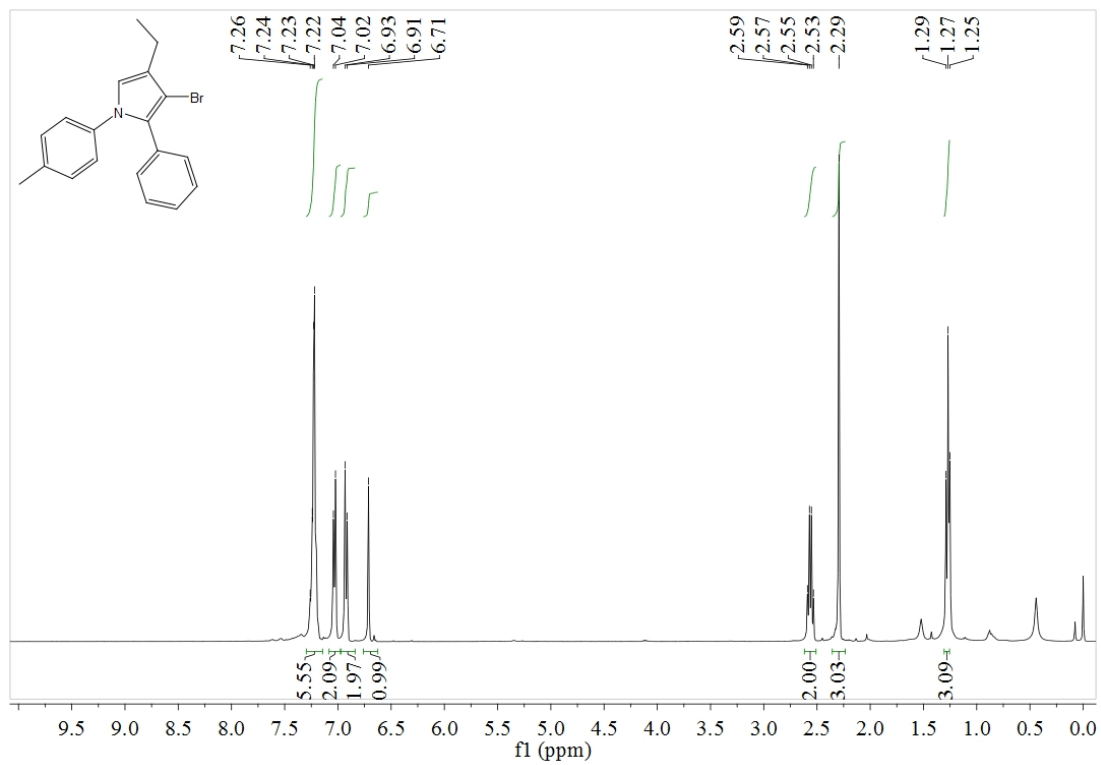

**3ak-<sup>1</sup>H**

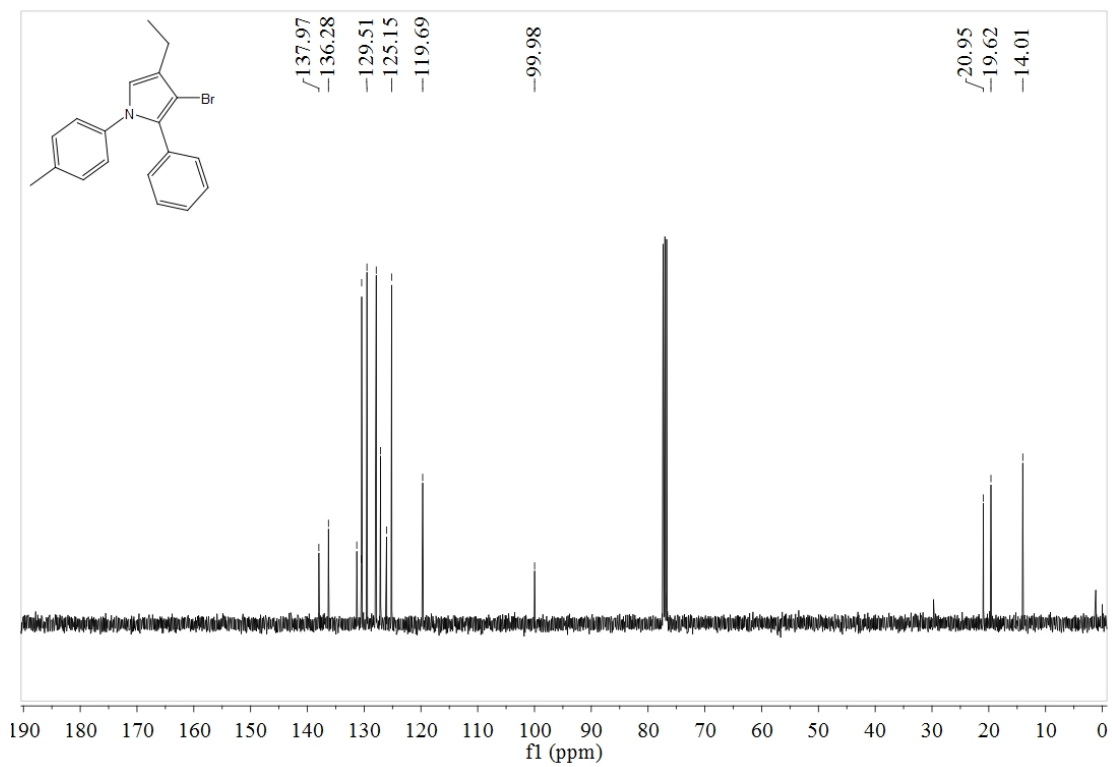

**3ak-<sup>13</sup>C**

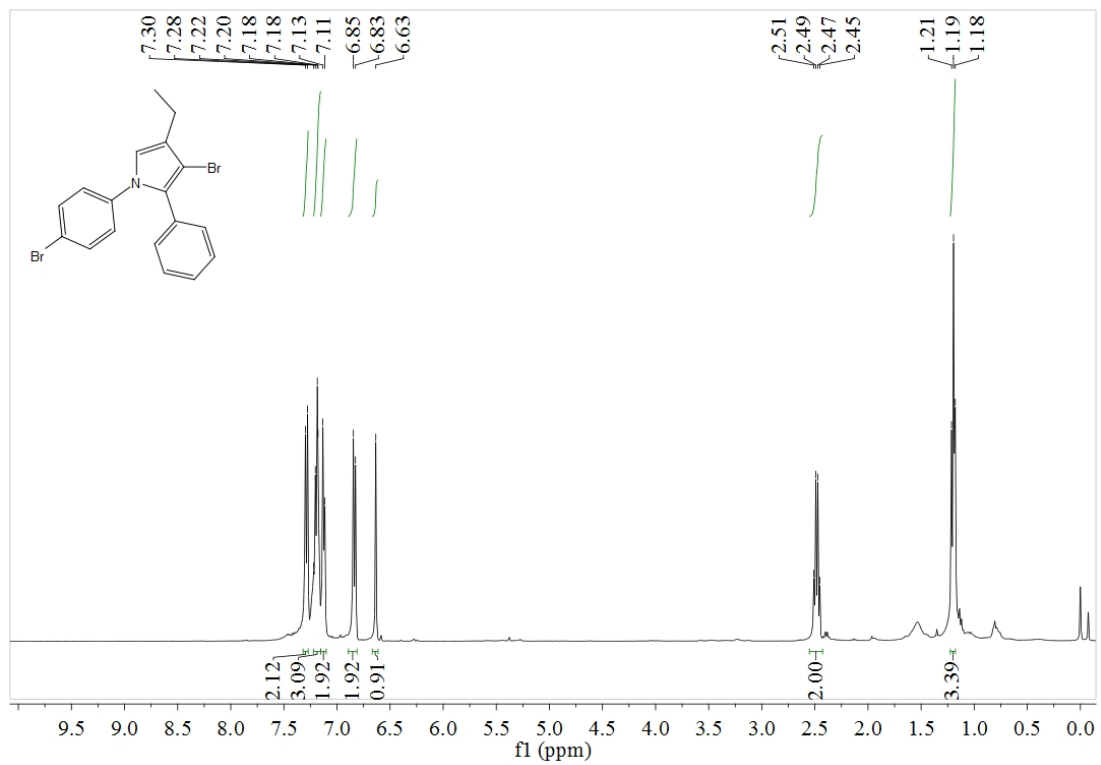

**3a**-<sup>1</sup>H

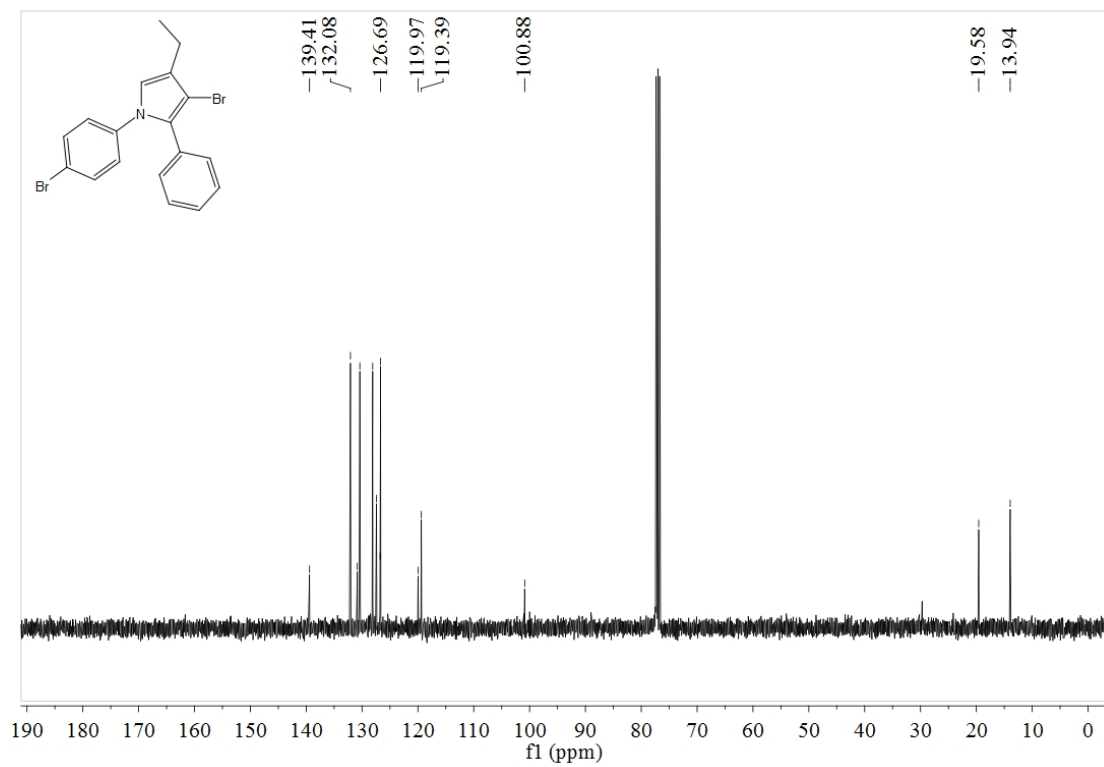

**3a**-<sup>13</sup>C

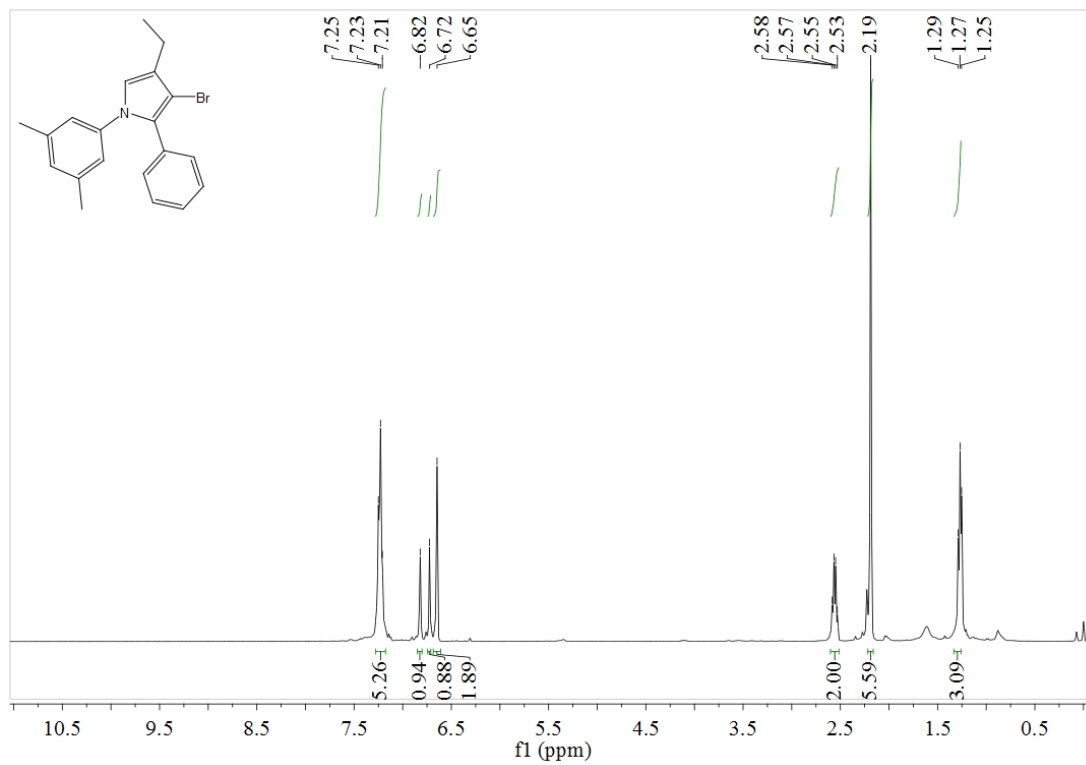

**3am-<sup>1</sup>H**

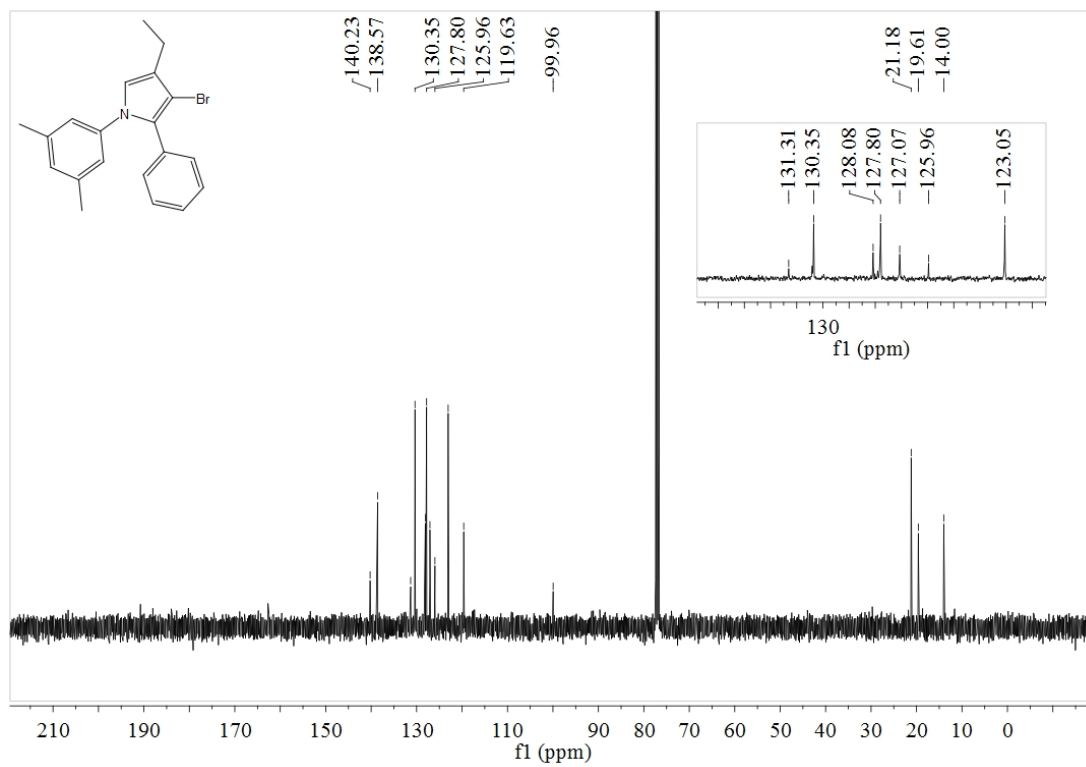

**3am-<sup>13</sup>C**

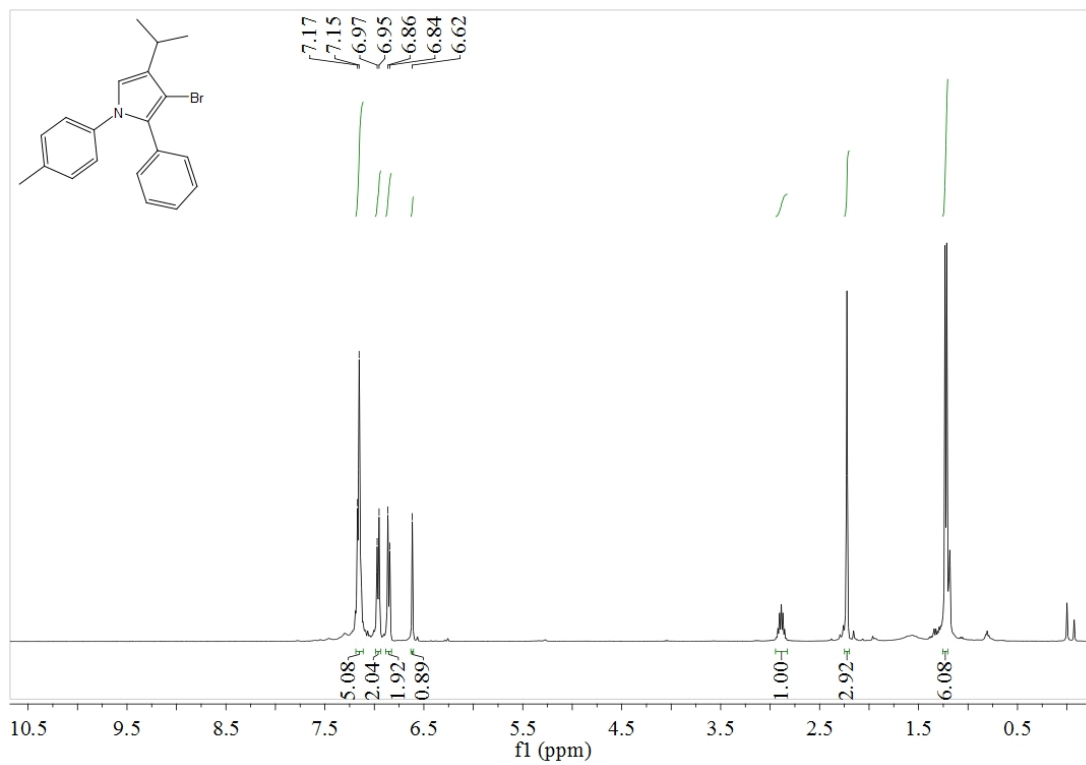

**3an-<sup>1</sup>H**

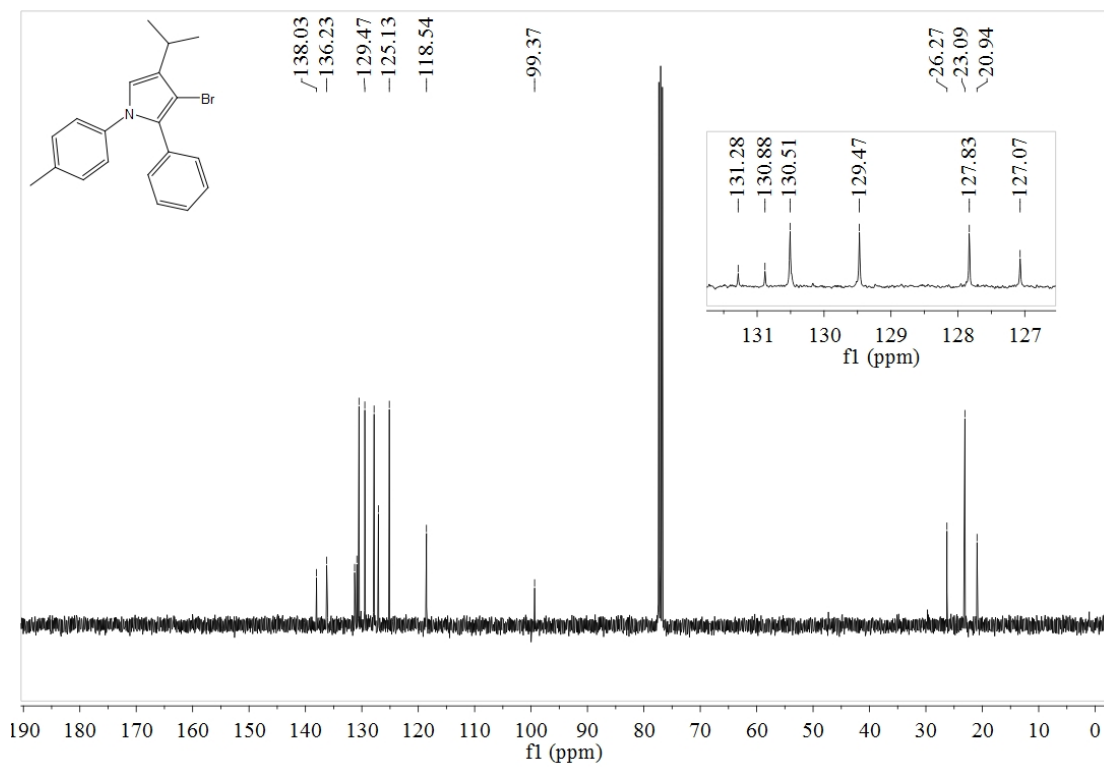

**3an-<sup>13</sup>C**



**3ao-<sup>1</sup>H**



**3ao-<sup>13</sup>C**



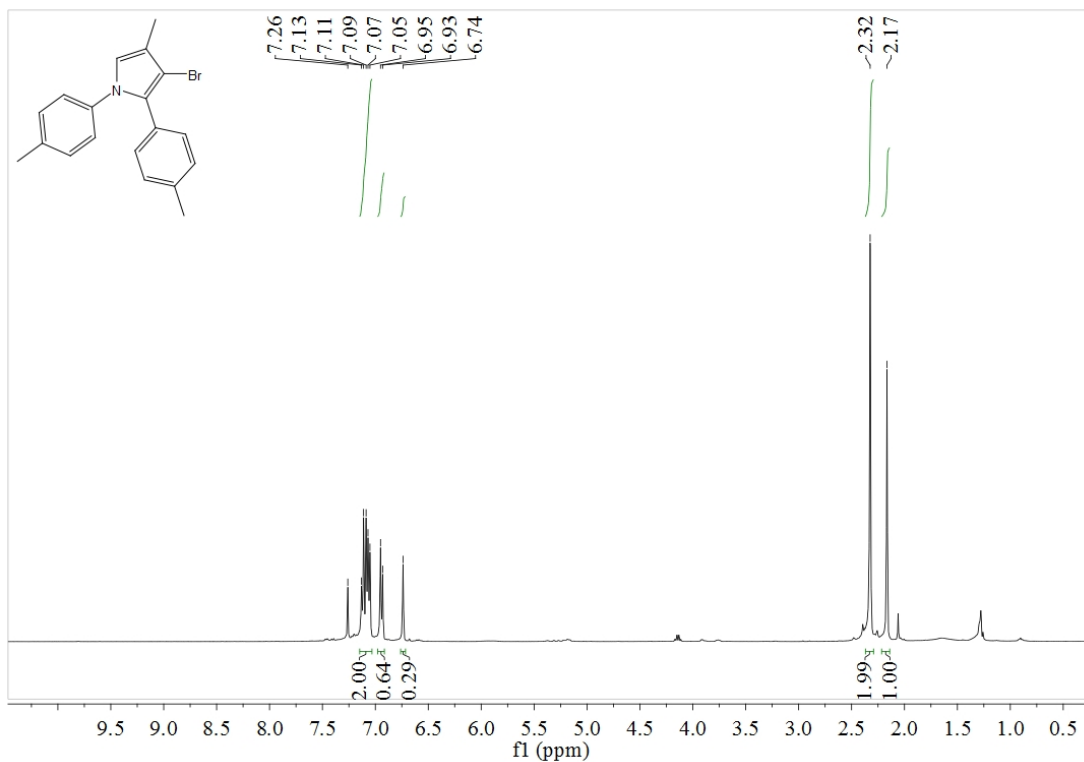

**3ba-<sup>1</sup>H**

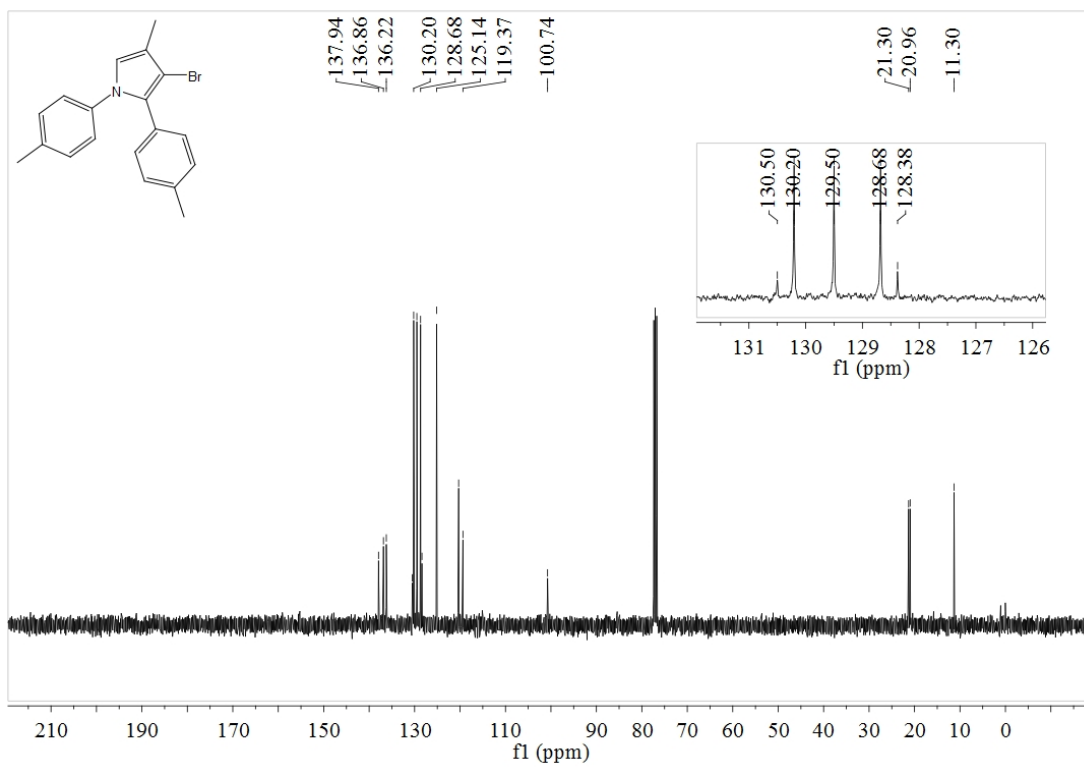

**3ba-<sup>13</sup>C**

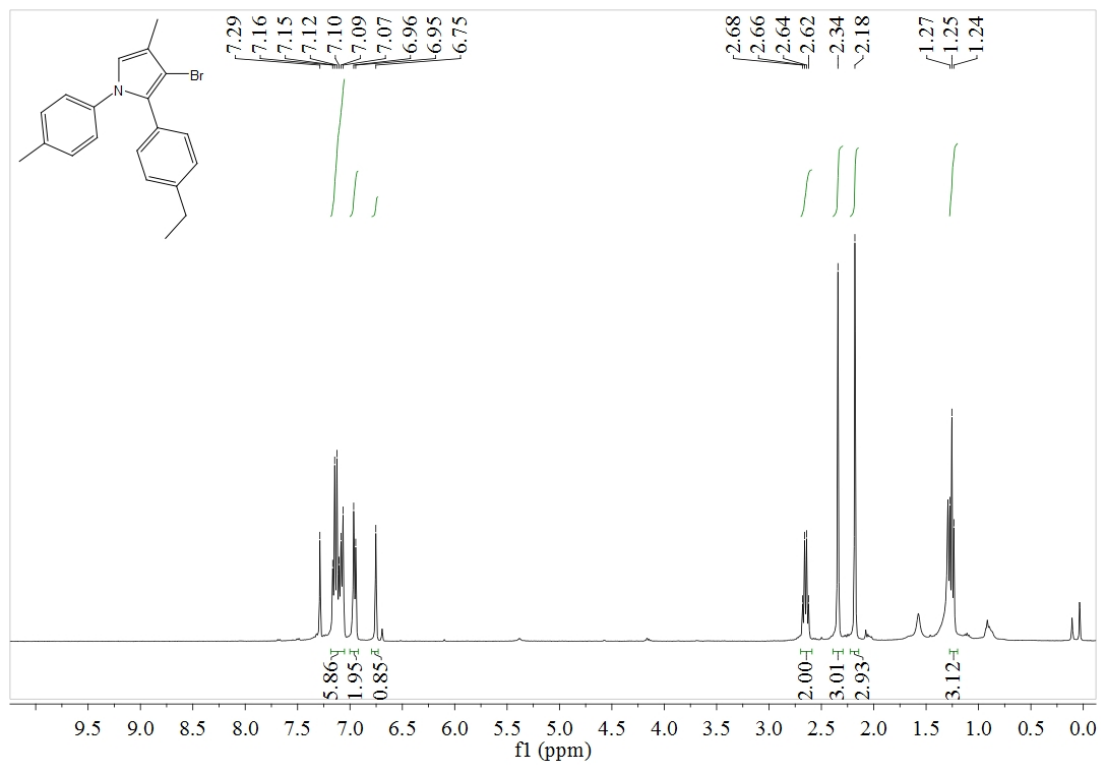

**3ca-<sup>1</sup>H**

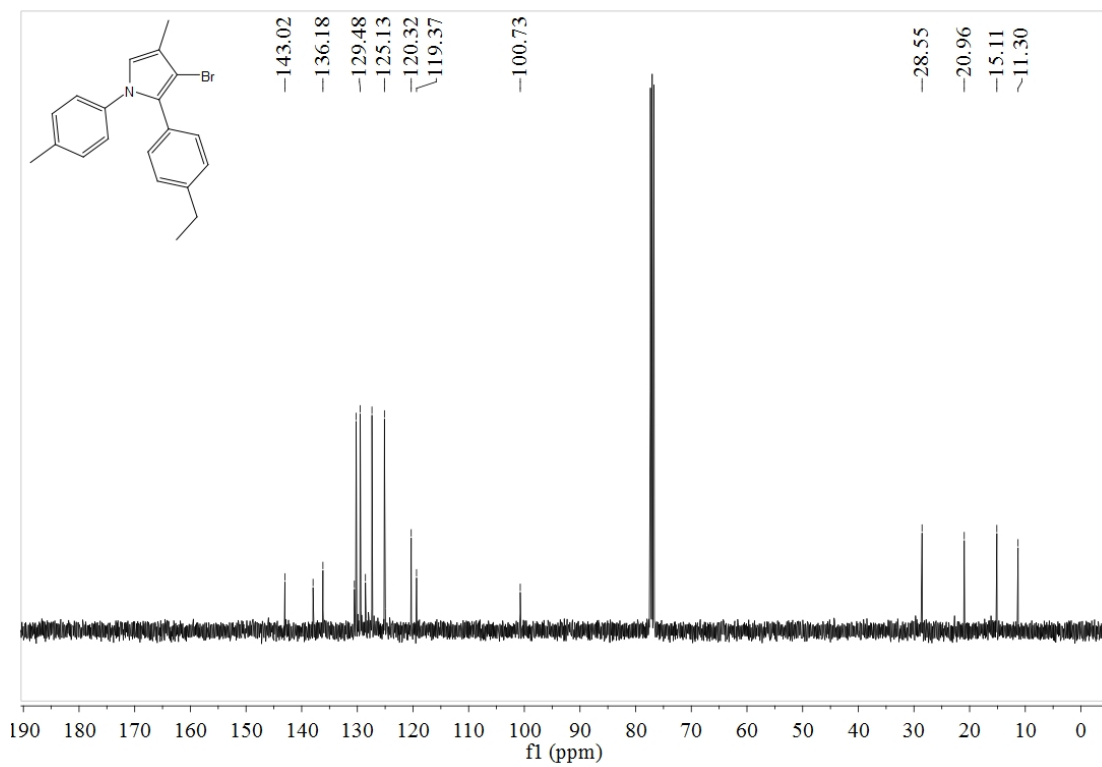

**3ca-<sup>13</sup>C**

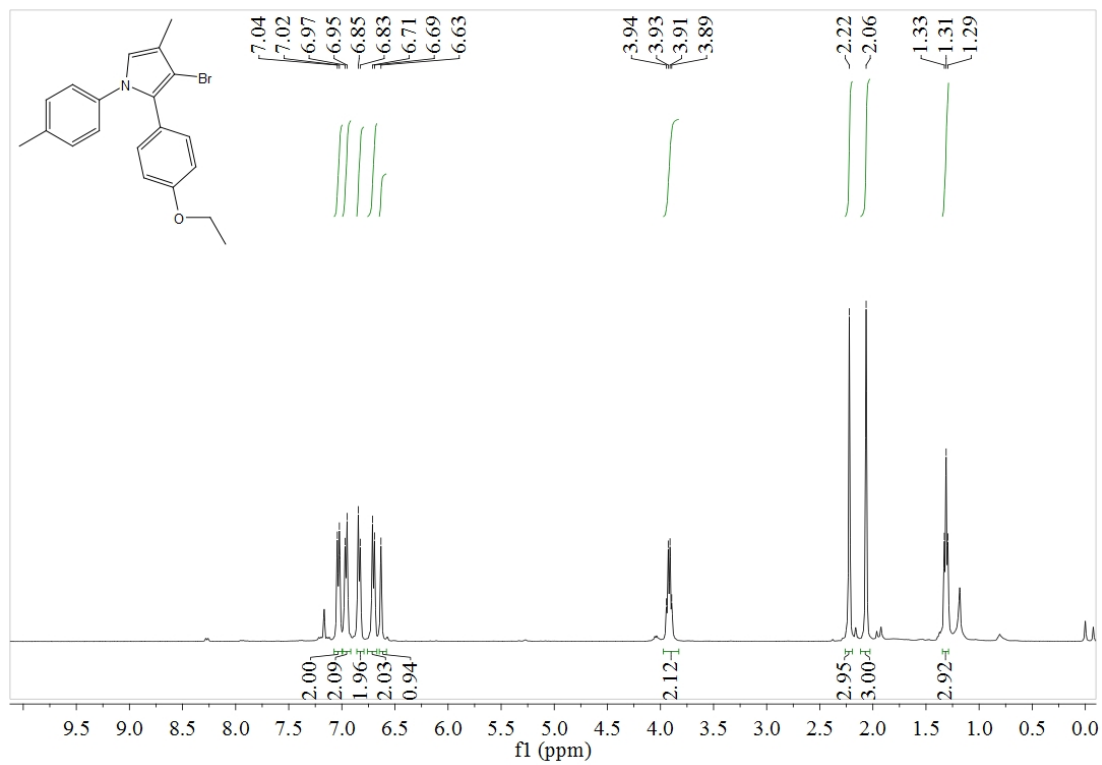

**3da-<sup>1</sup>H**

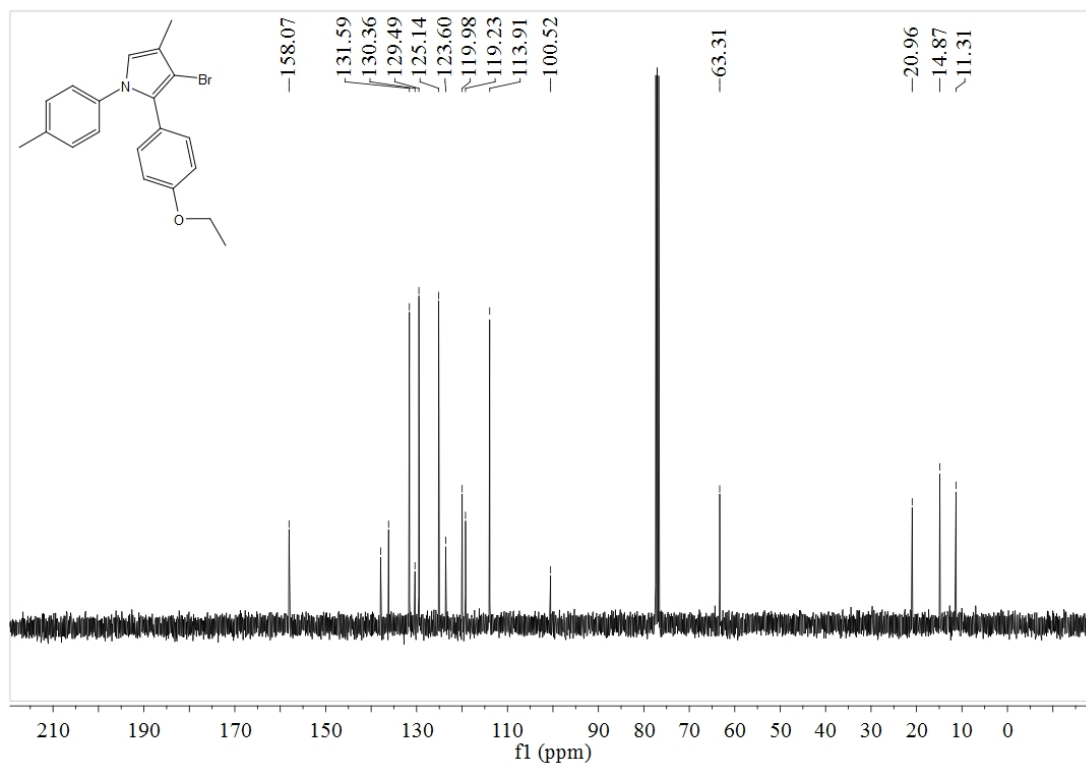

**3da-<sup>13</sup>C**

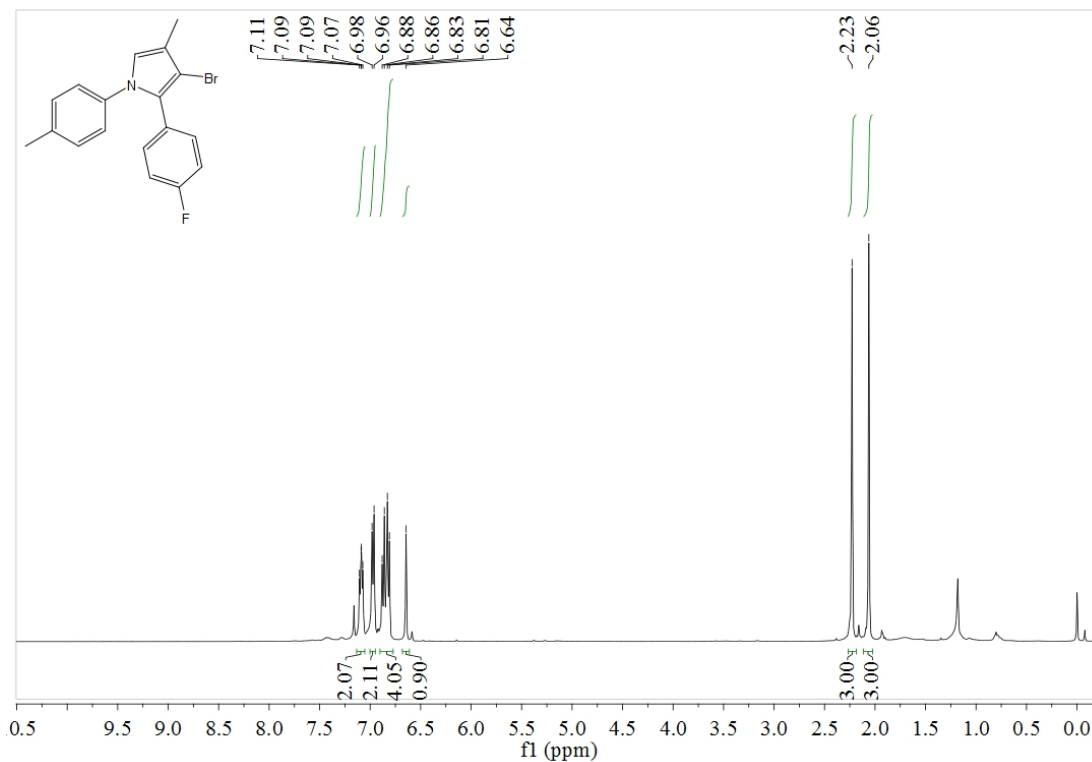

**3ea-<sup>1</sup>H**

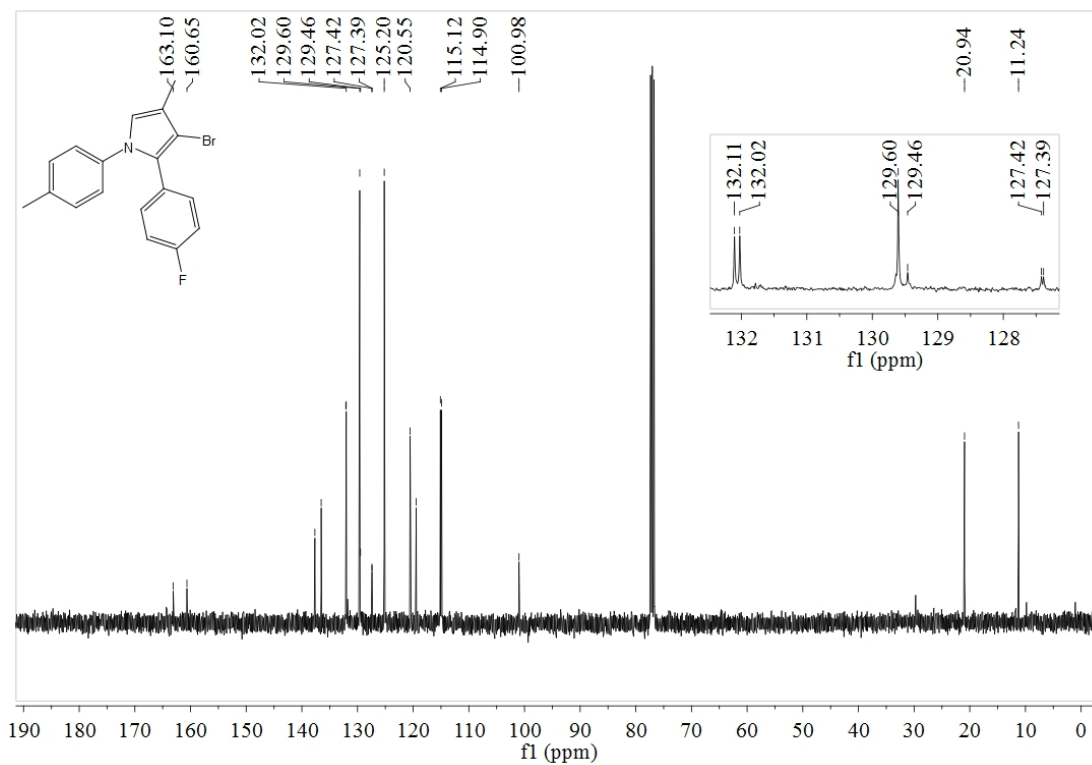

**3ea-<sup>13</sup>C**

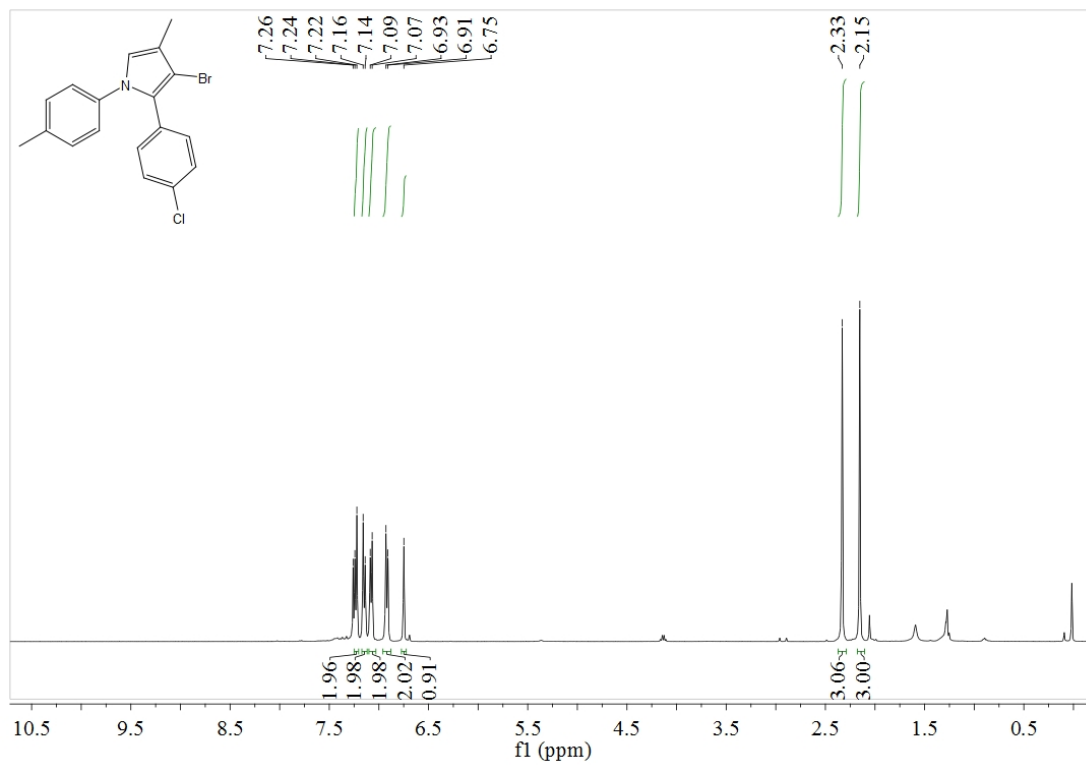

**3fa-<sup>1</sup>H**

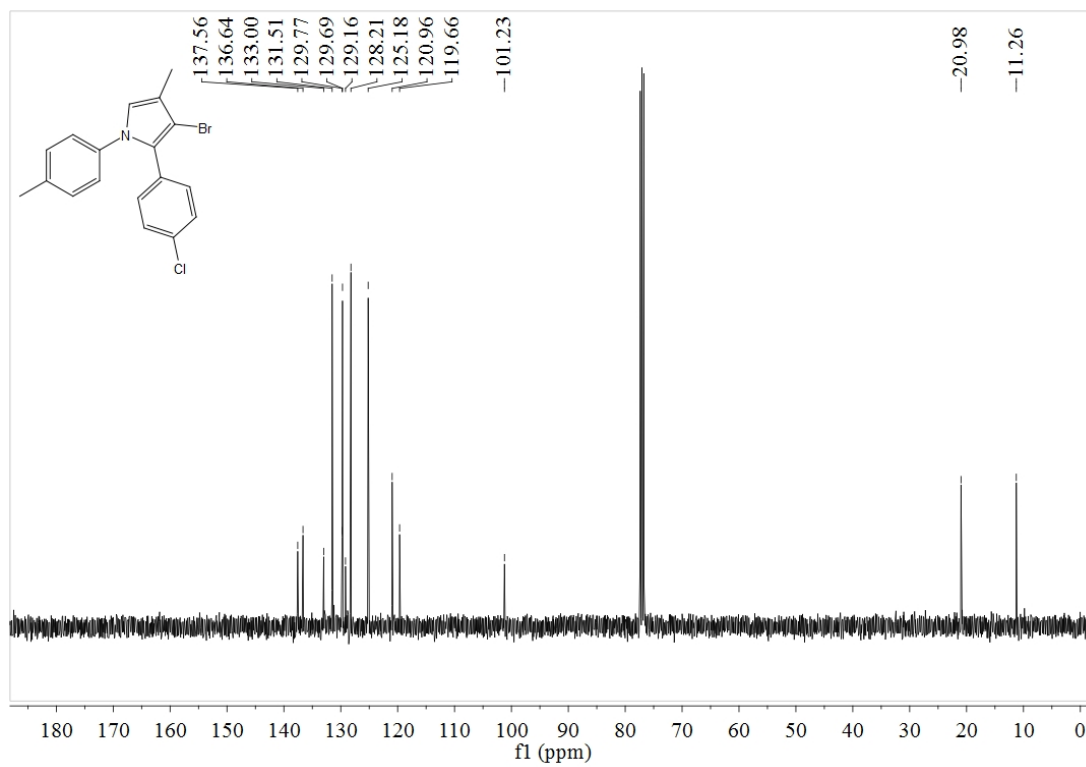

**3fa-<sup>13</sup>C**

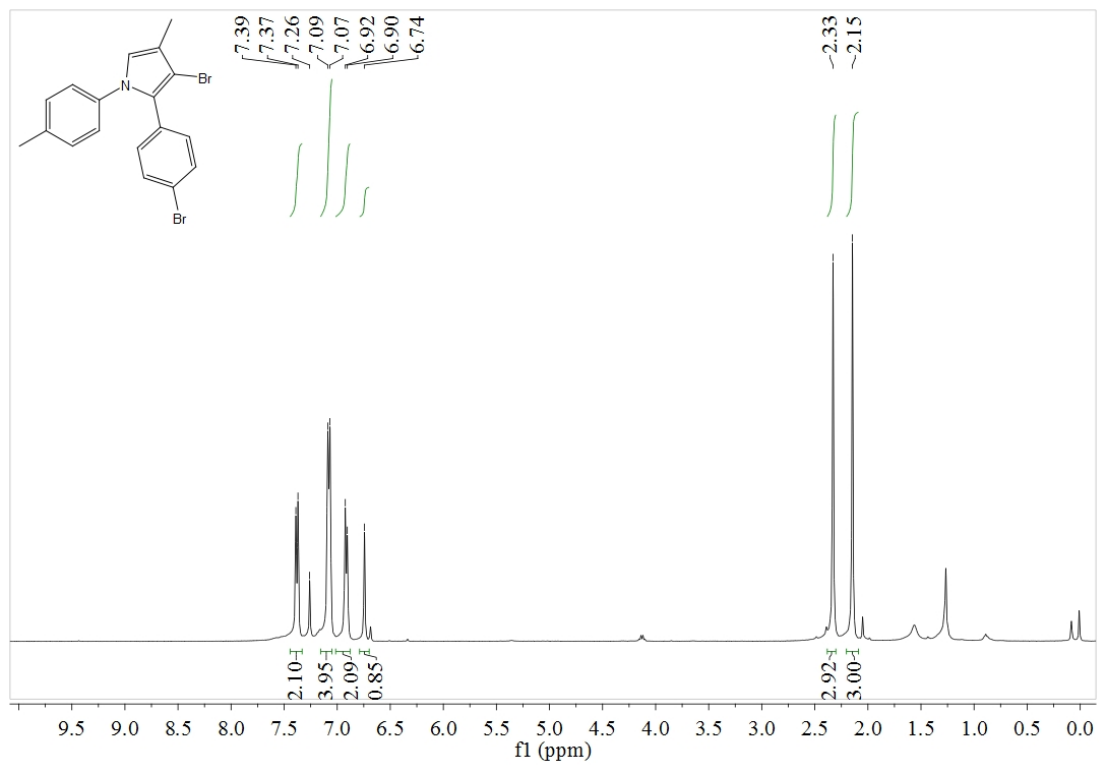

**3ga-<sup>1</sup>H**

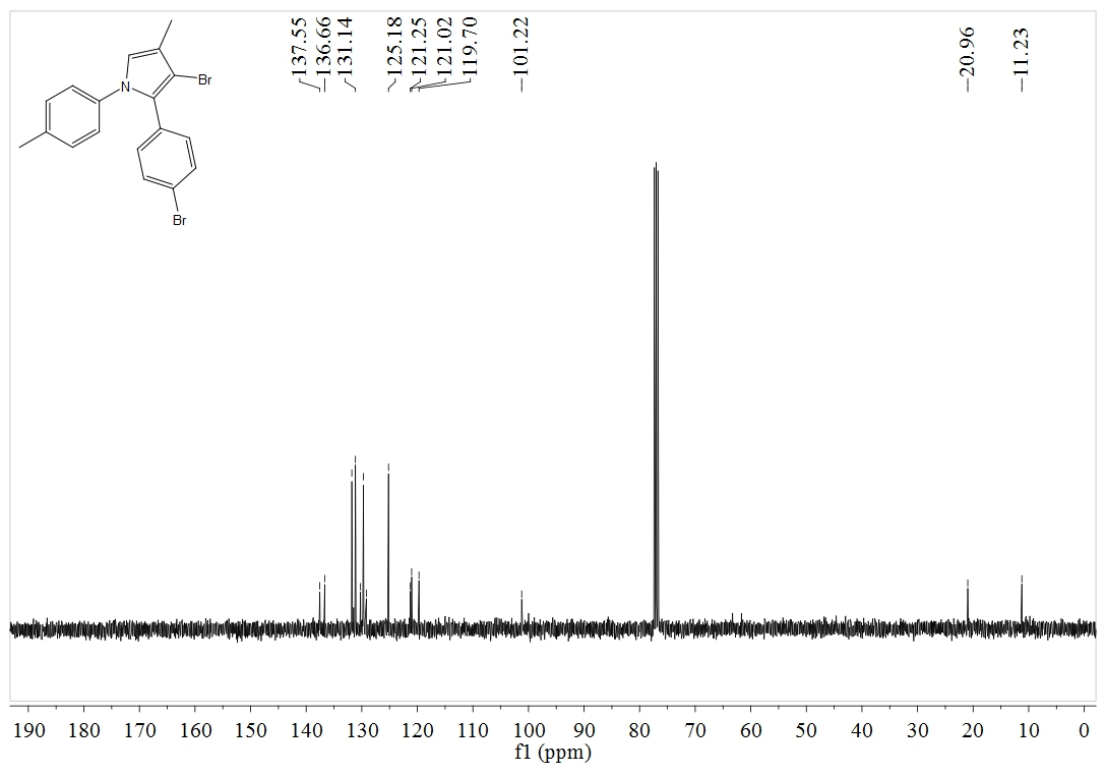

**3ga-<sup>13</sup>C**

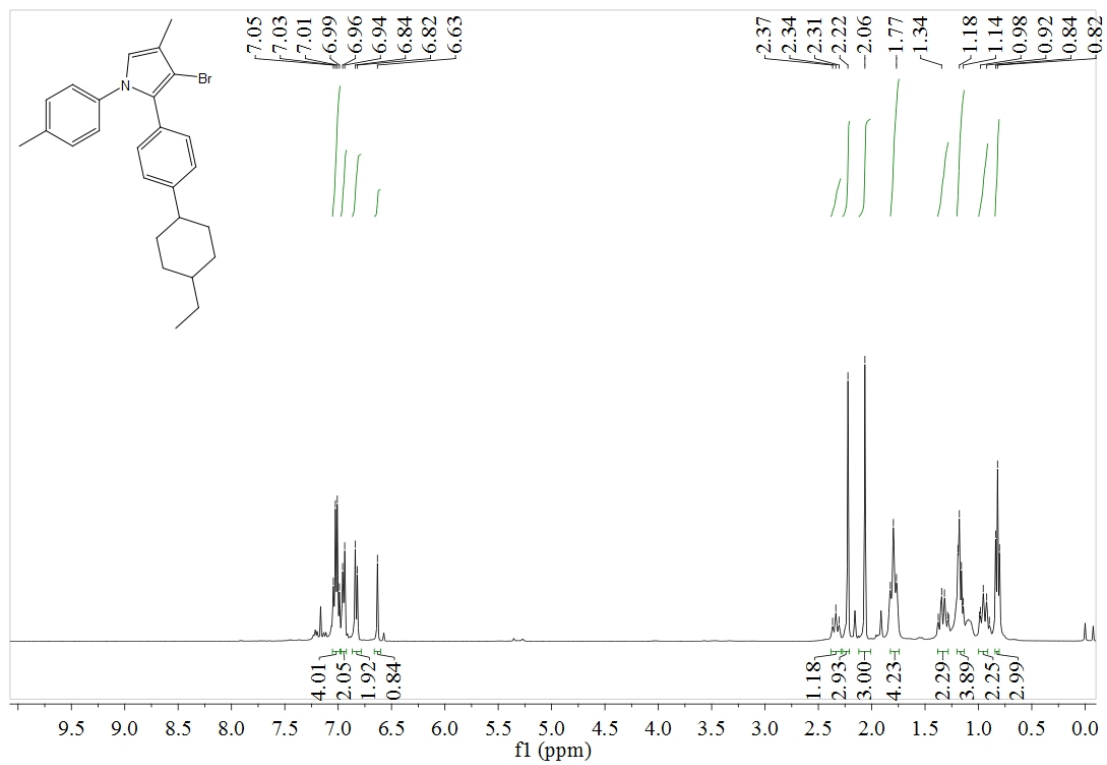

**3ha-<sup>1</sup>H**

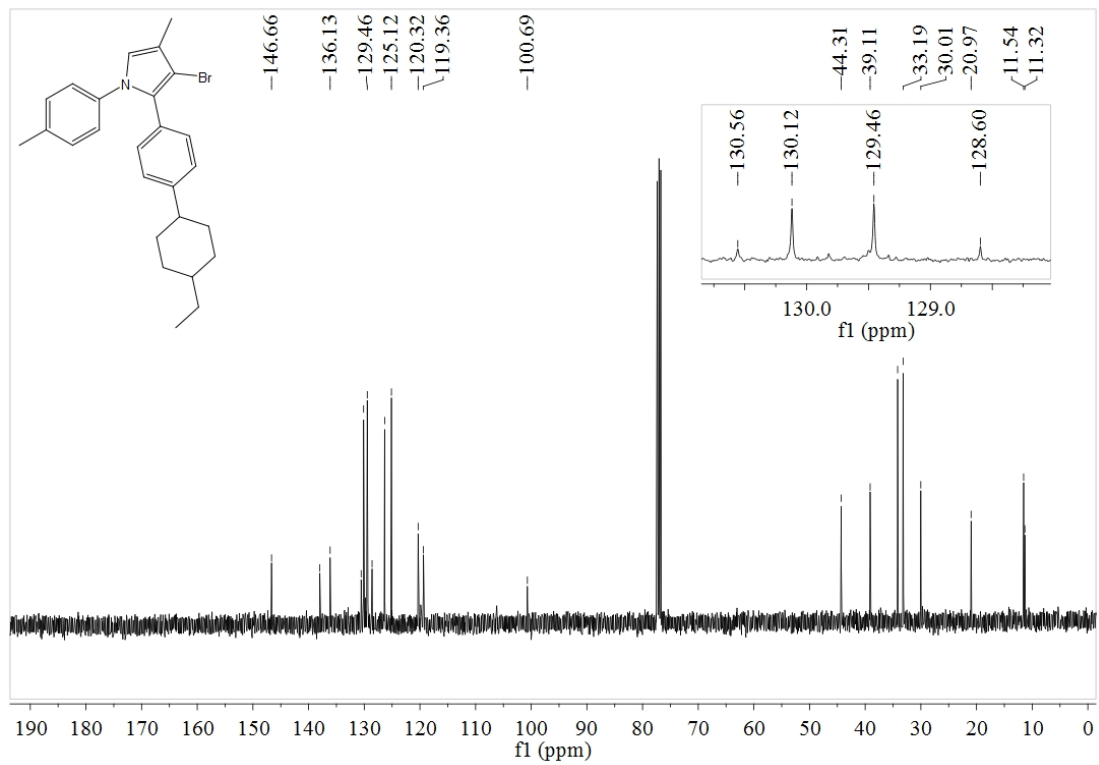

**3ha-<sup>13</sup>C**

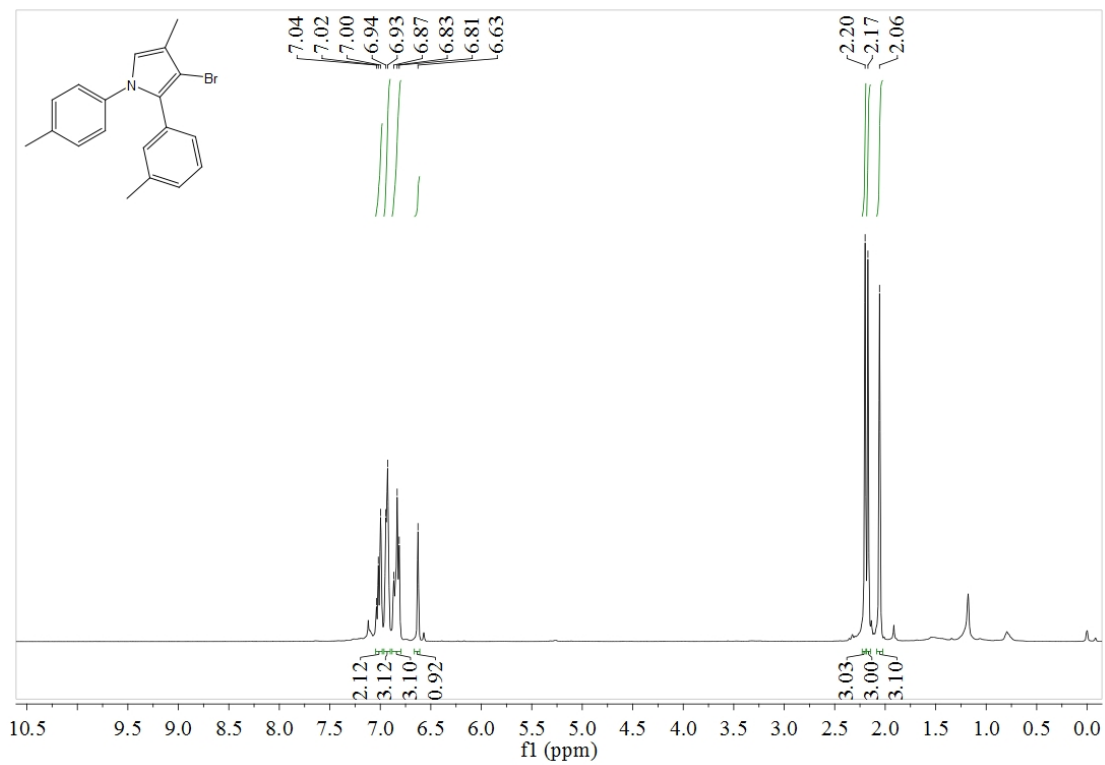

**3ia-<sup>1</sup>H**

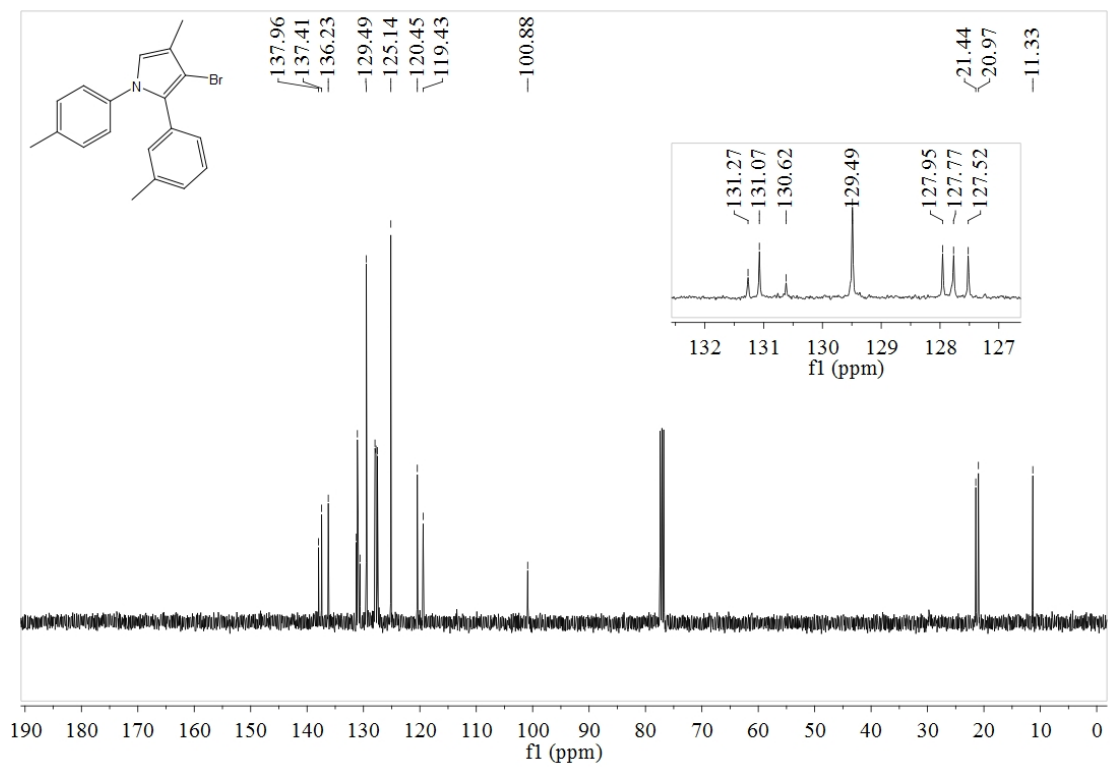

**3ia-<sup>13</sup>C**



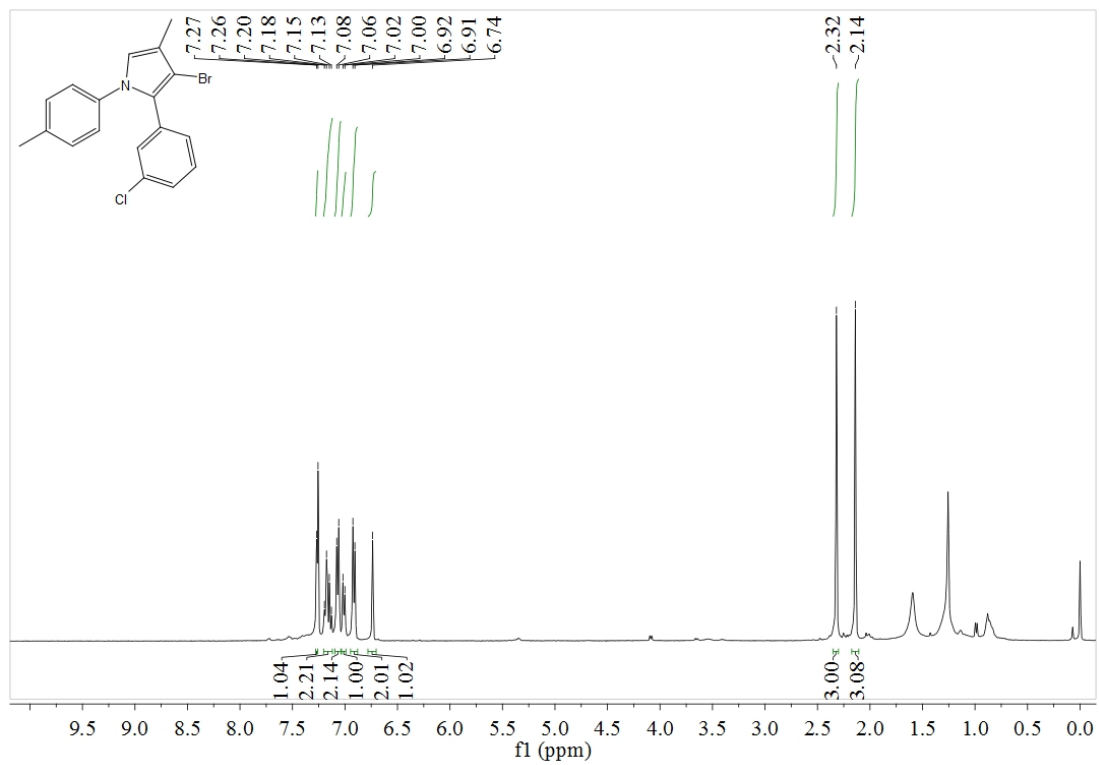

**3ja-<sup>1</sup>H**

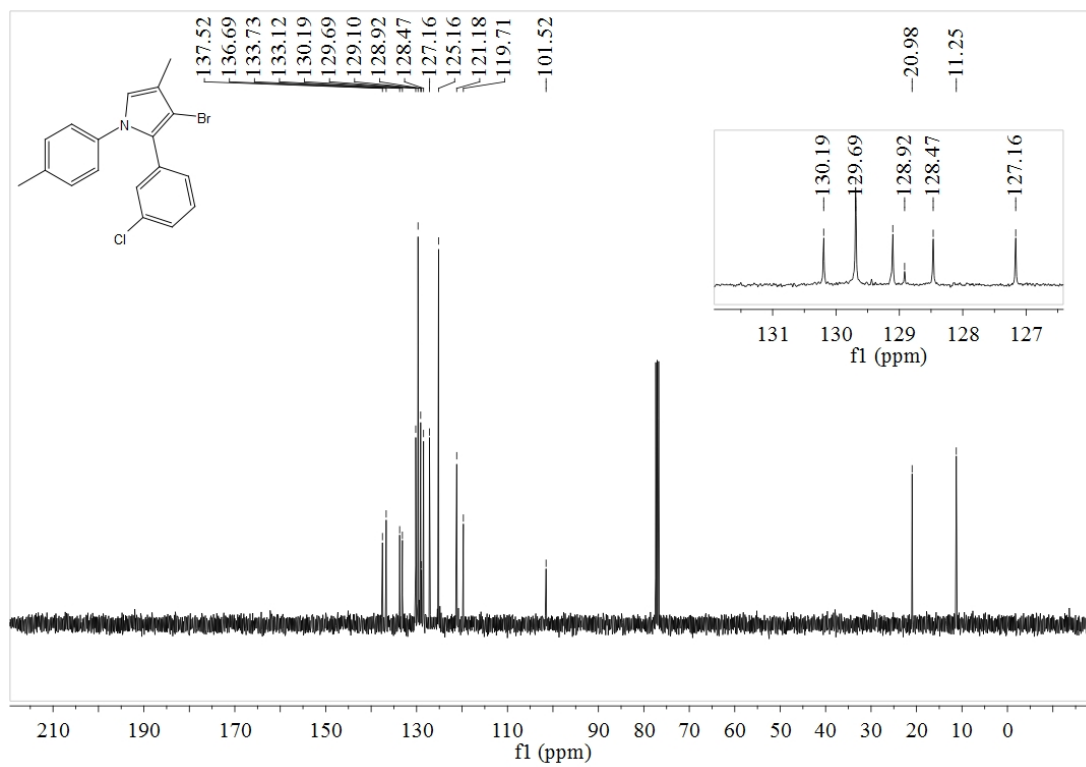

**3ja-<sup>13</sup>C**

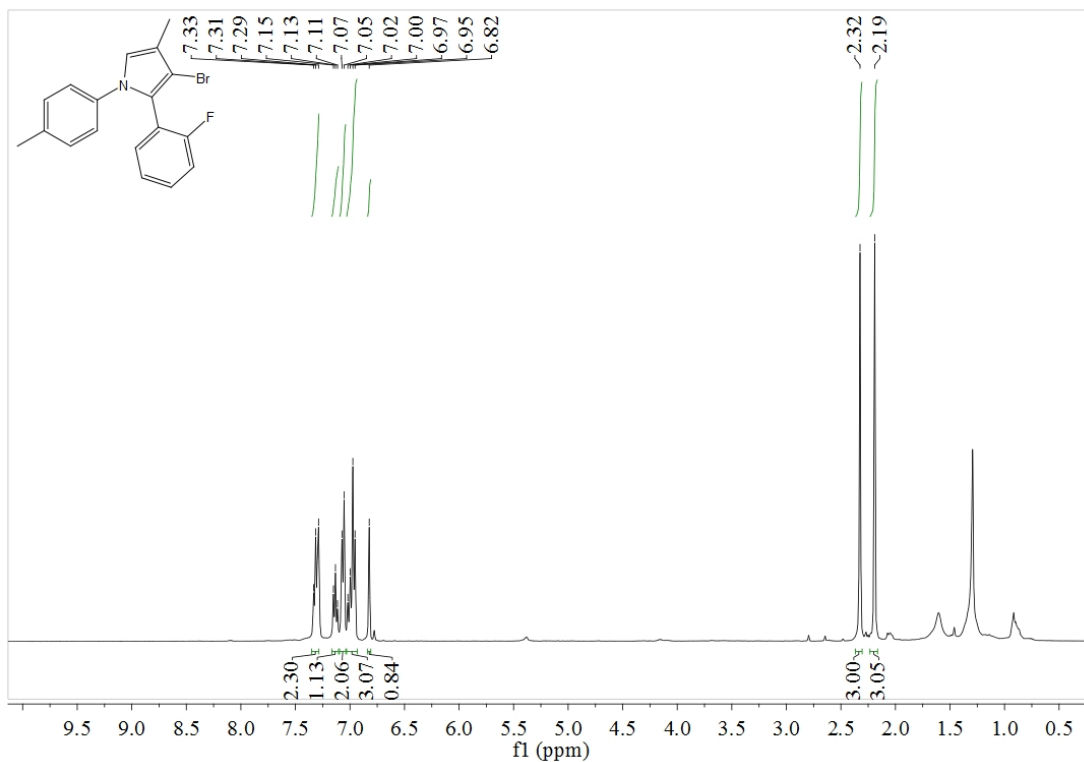

**3ka-<sup>1</sup>H**

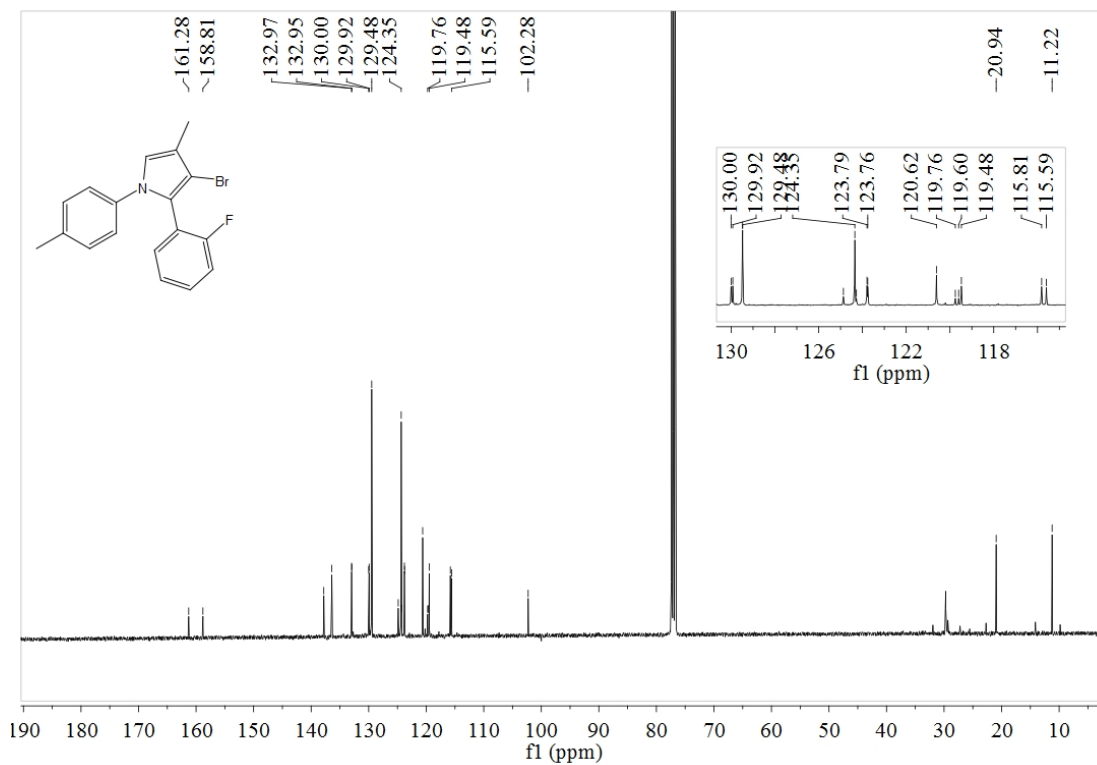

**3ka-<sup>13</sup>C**

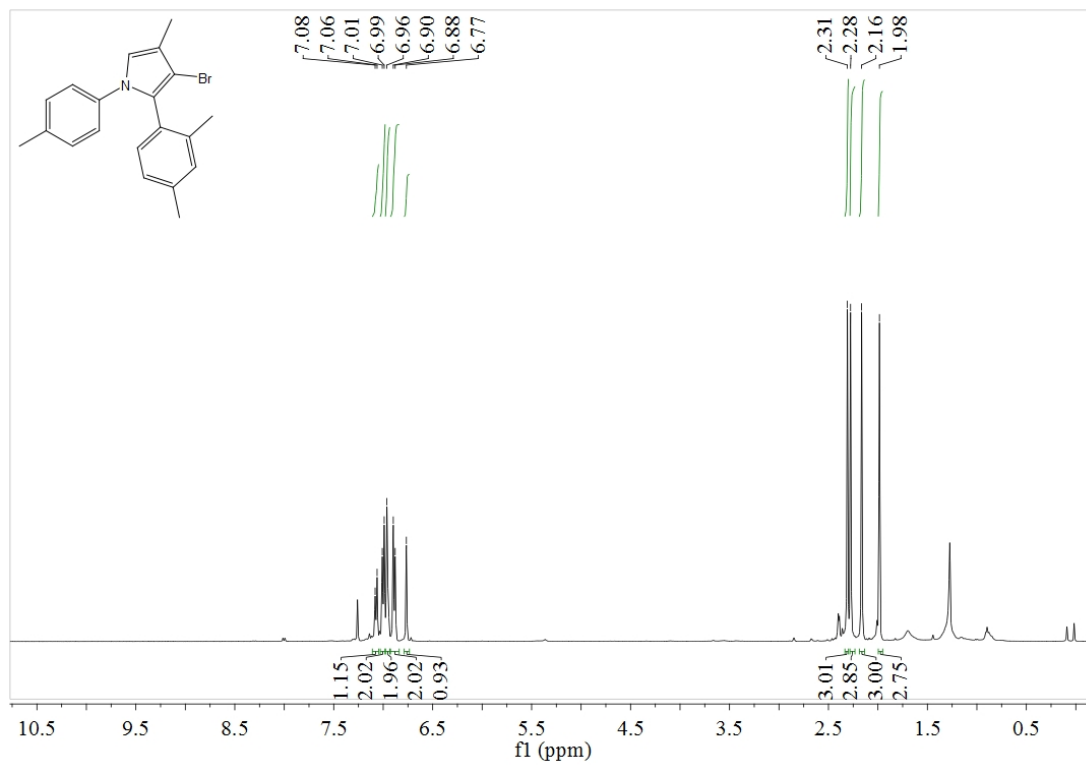

**3la-<sup>1</sup>H**

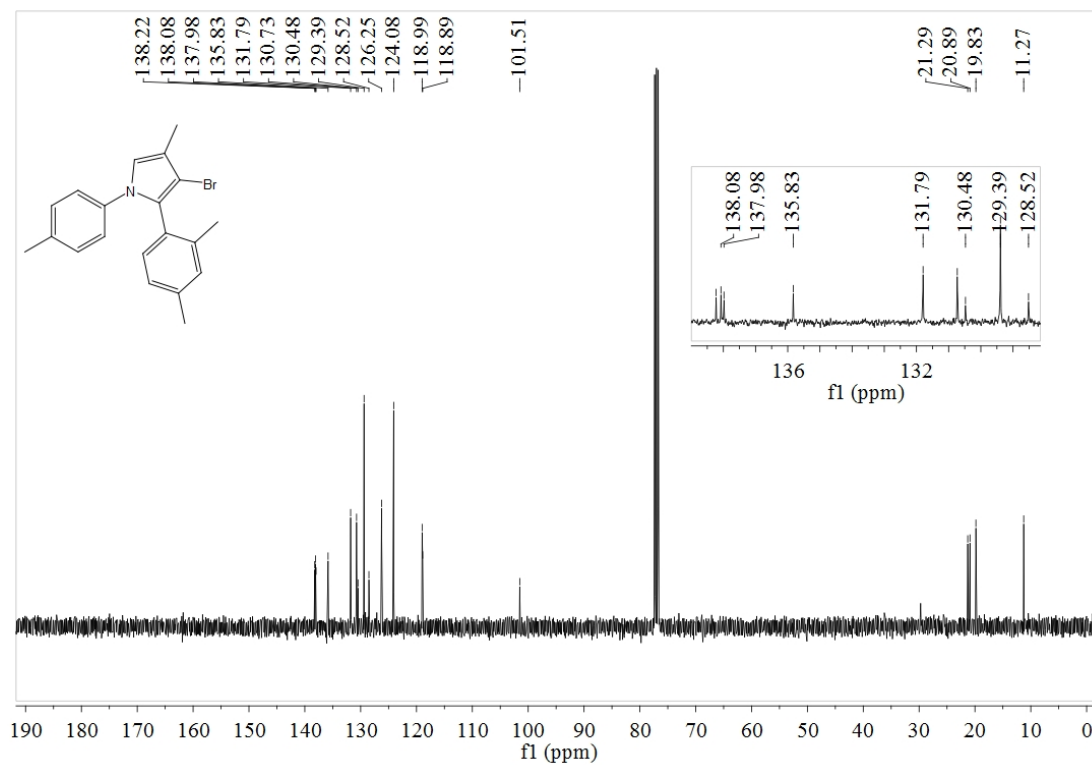

**3la-<sup>13</sup>C**

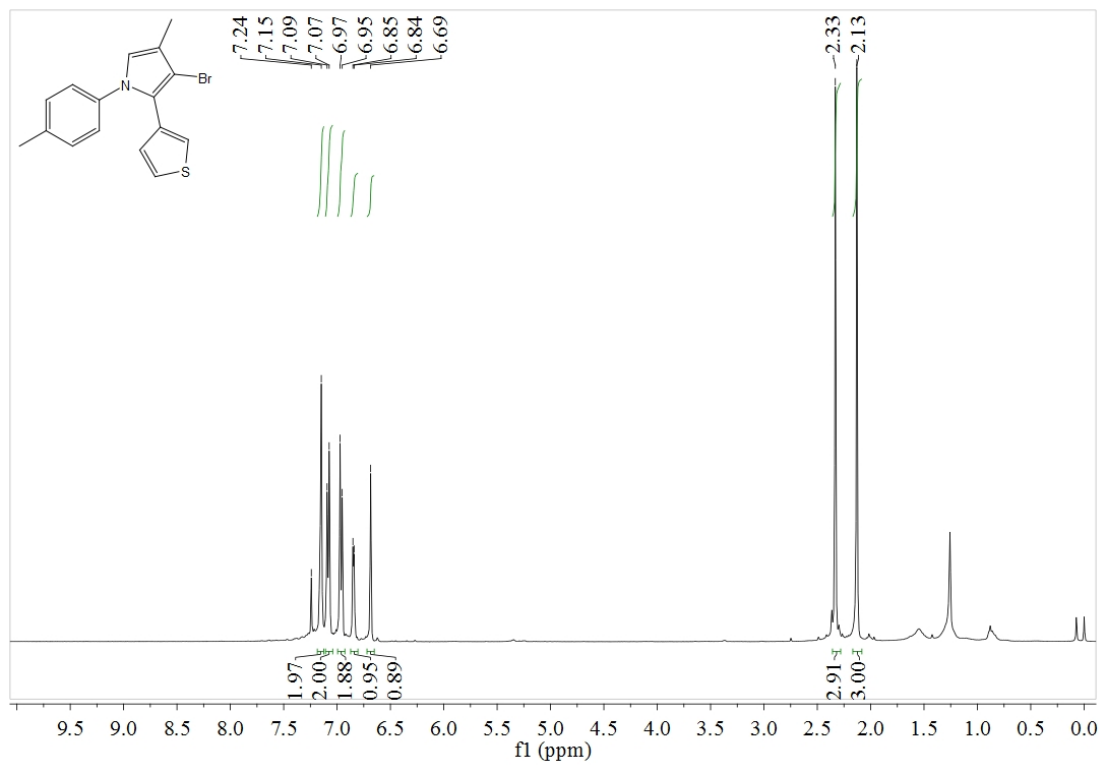

**3ma-<sup>1</sup>H**

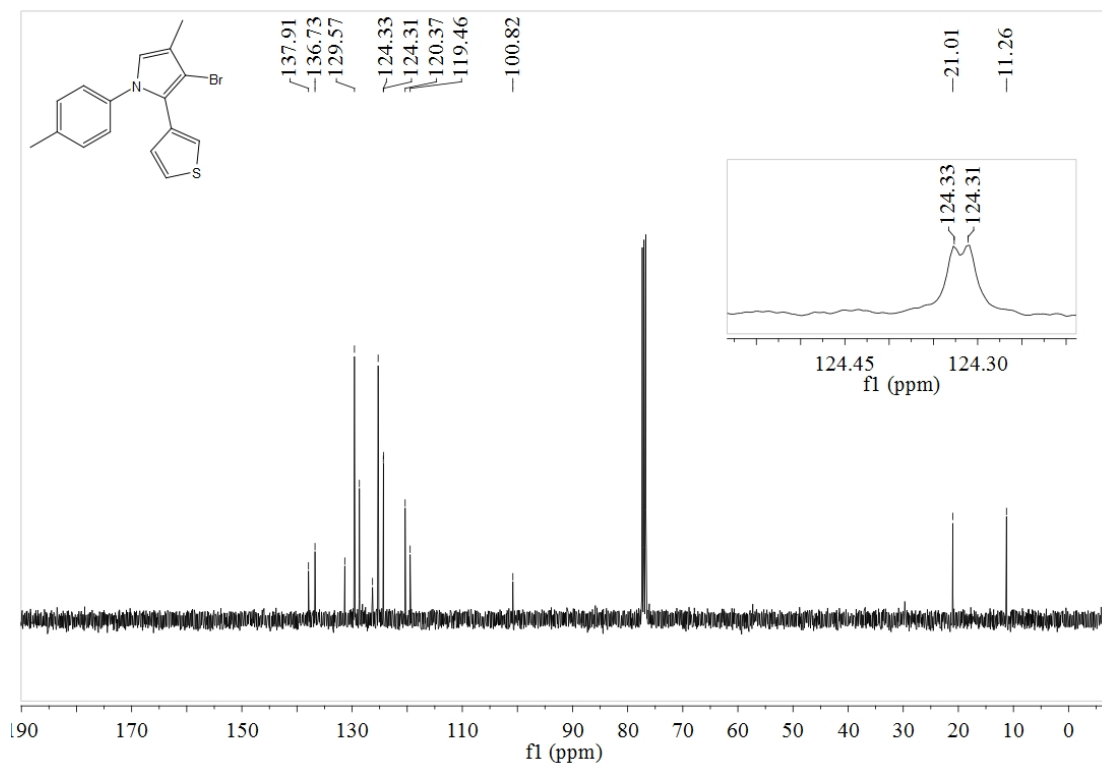

**3ma-<sup>13</sup>C**

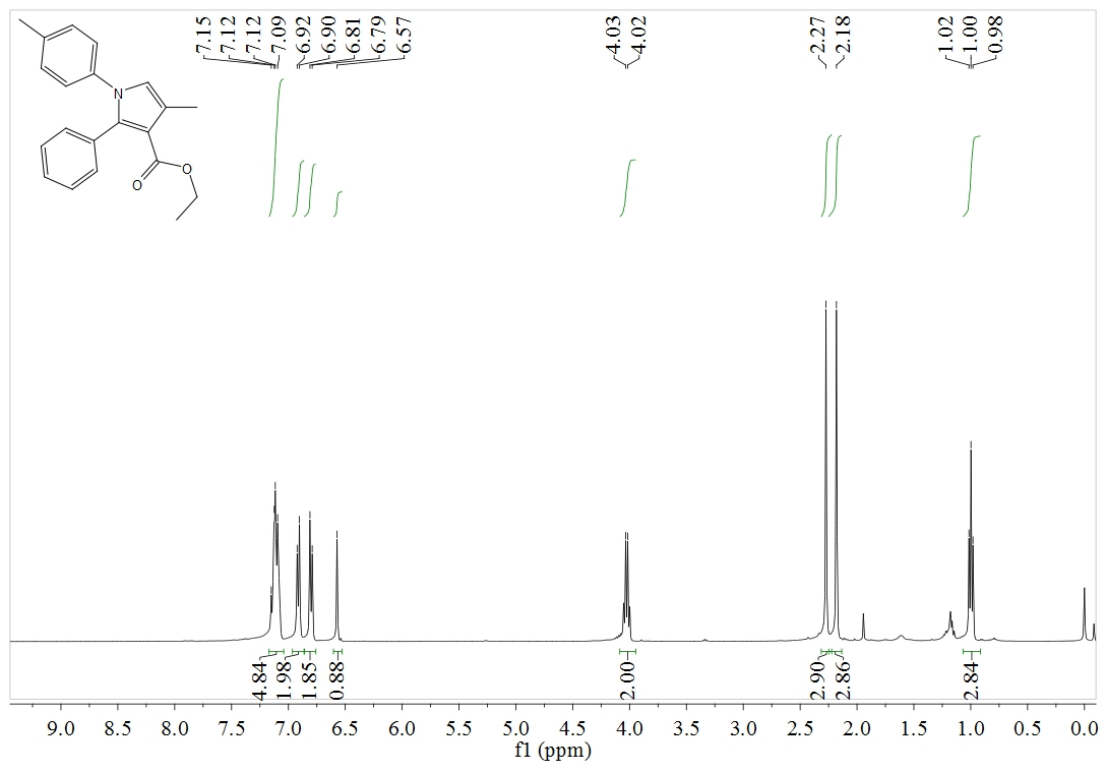

**5a-<sup>1</sup>H**

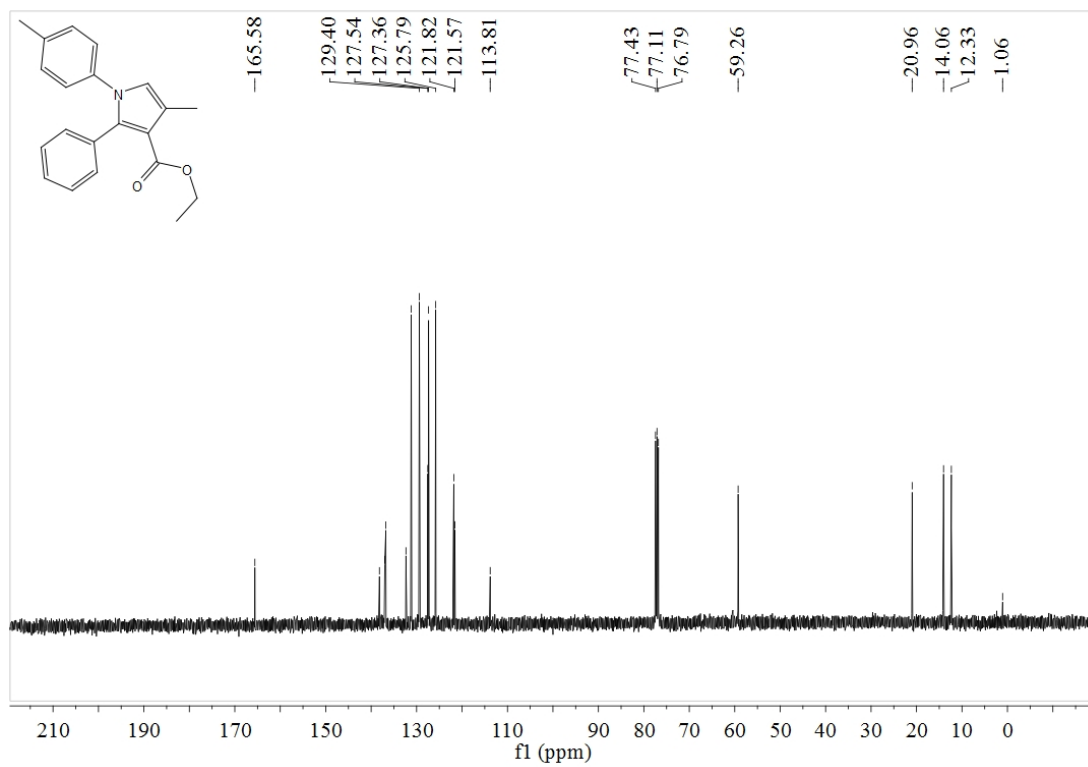

**5a-<sup>13</sup>C**

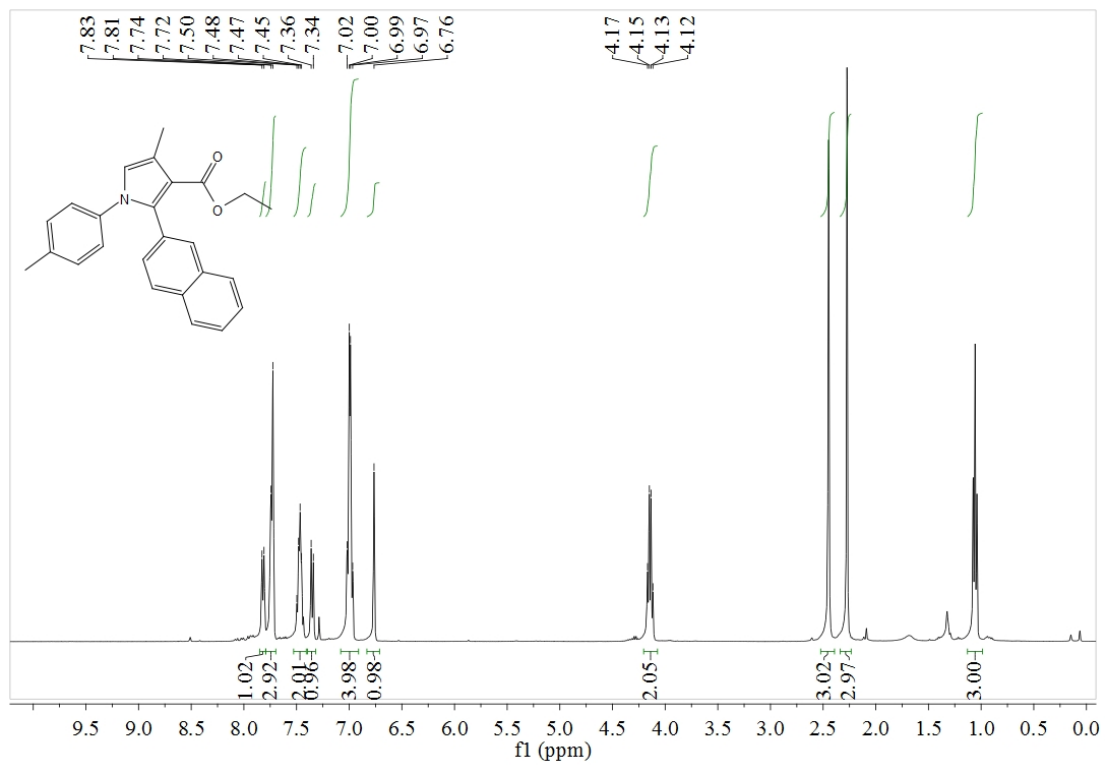

**5b-<sup>1</sup>H**

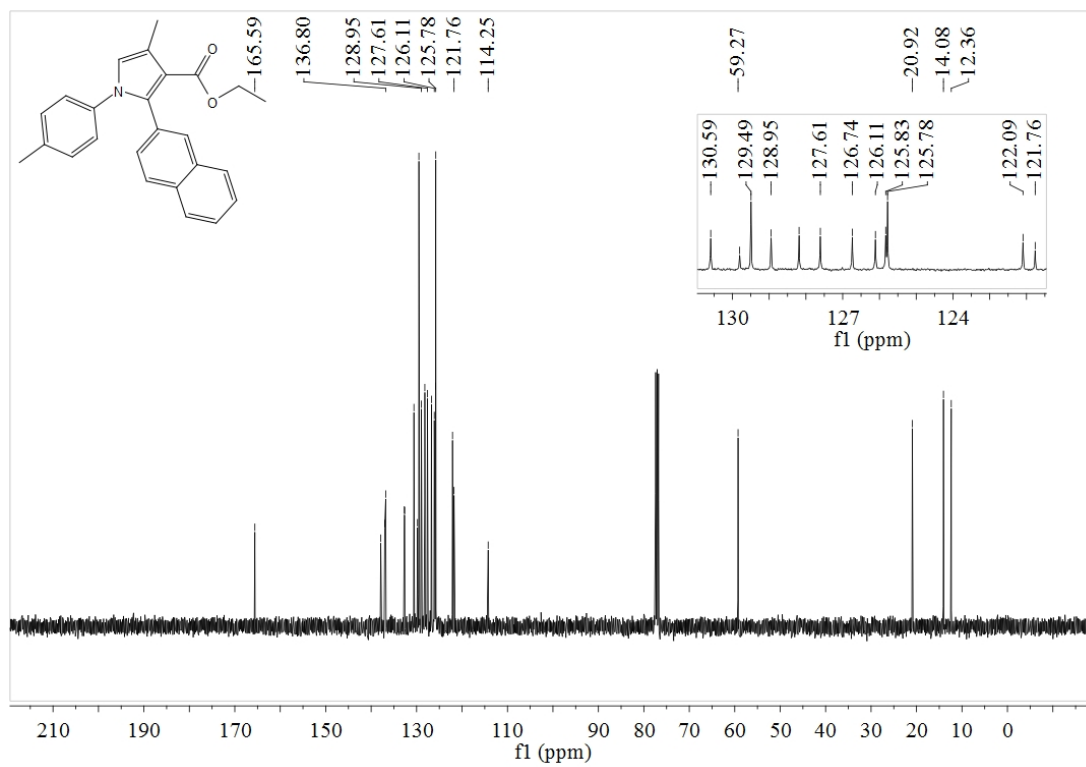

**5b-<sup>13</sup>C**

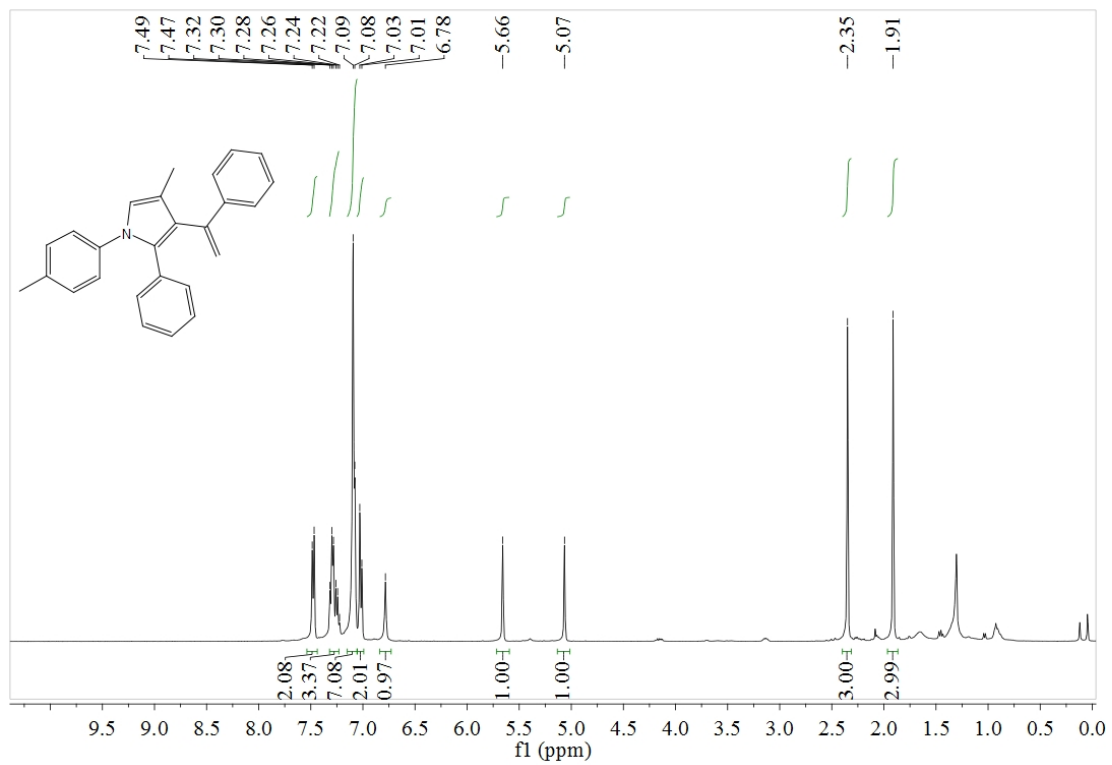

**9-<sup>1</sup>H**

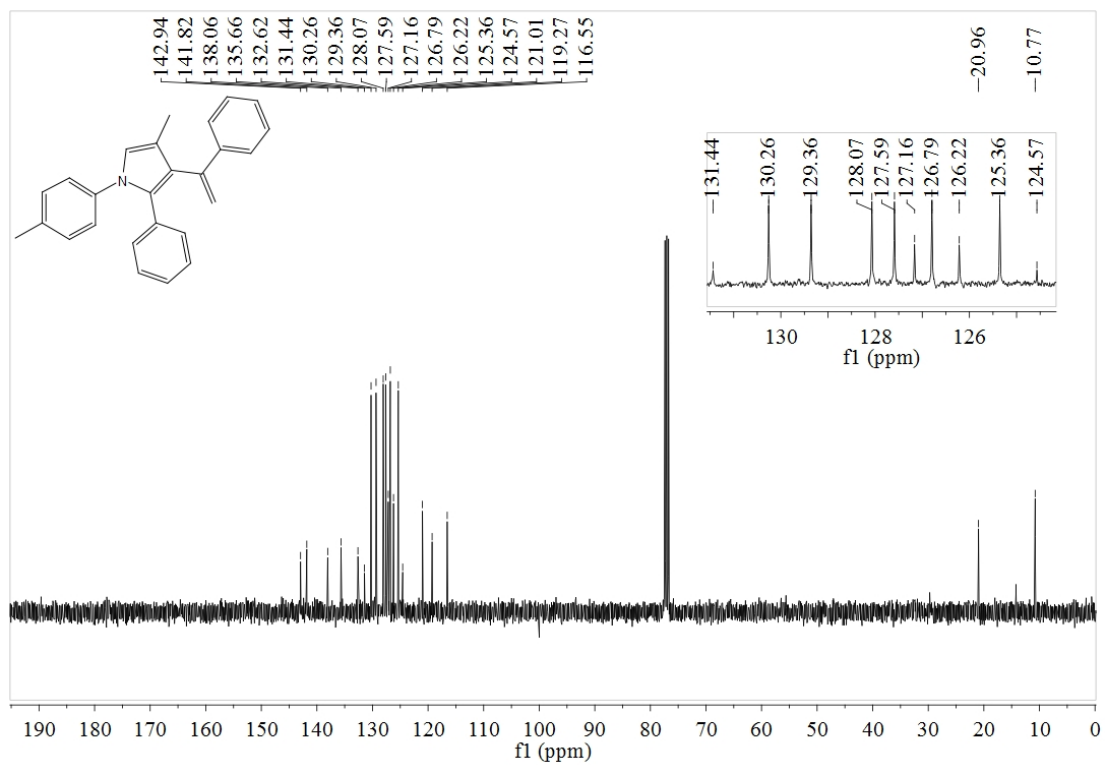

**9-<sup>13</sup>C**

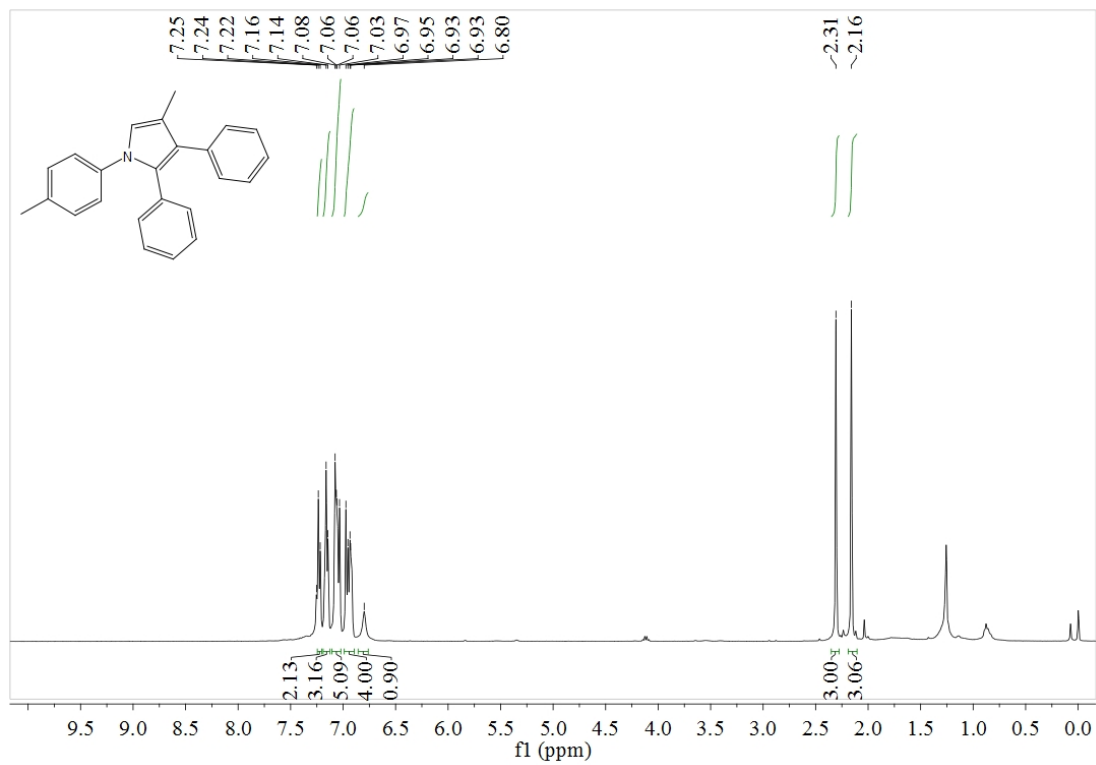

**$^{10}\text{-}^1\text{H}$**

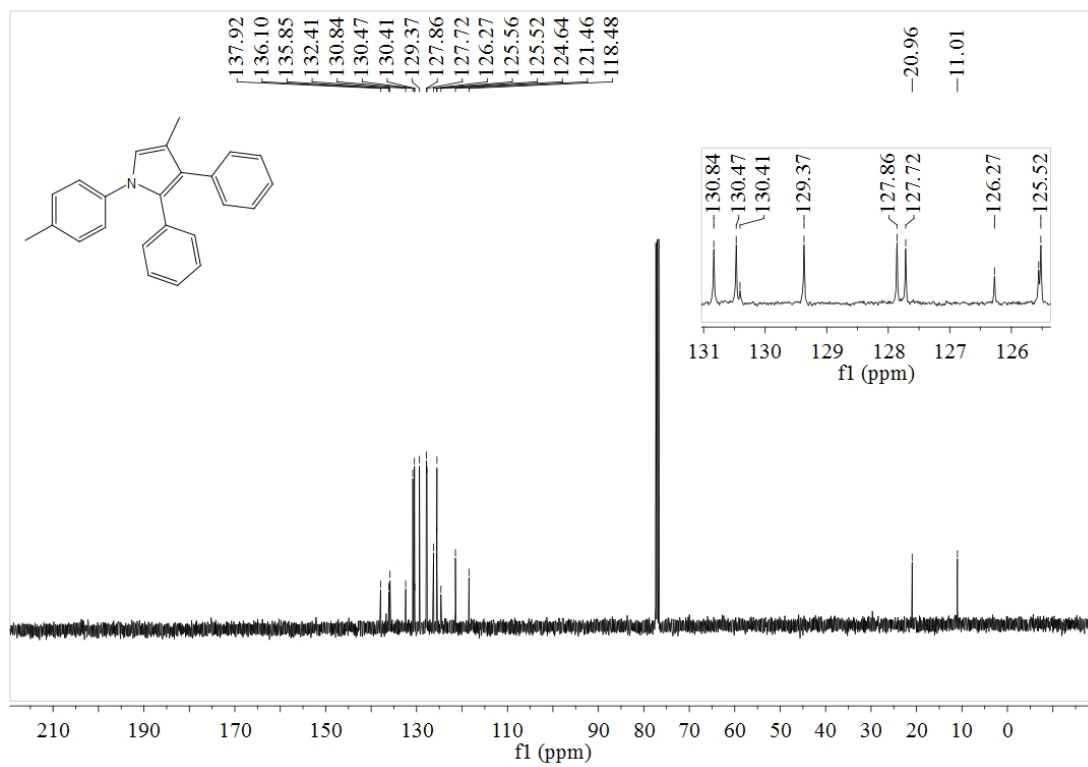

**$^{10}\text{-}^{13}\text{C}$**



## F. Studies on the stereochemistry of 3fa and 5a

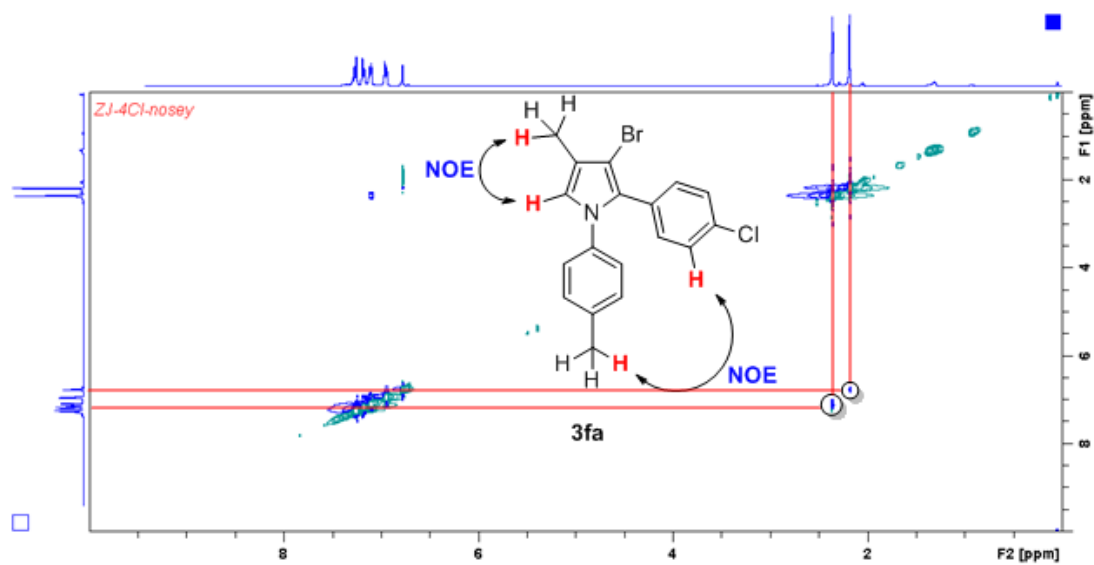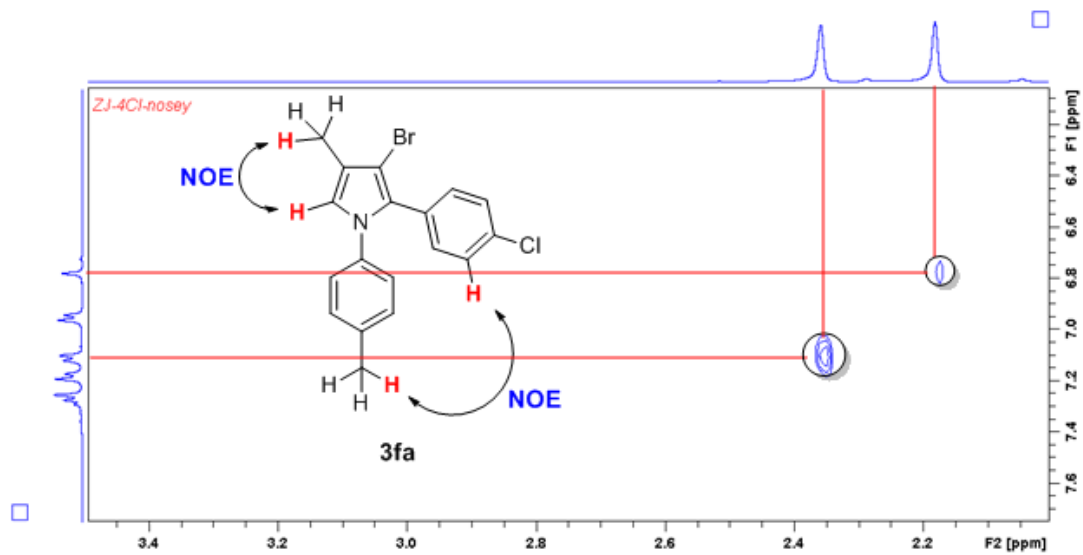

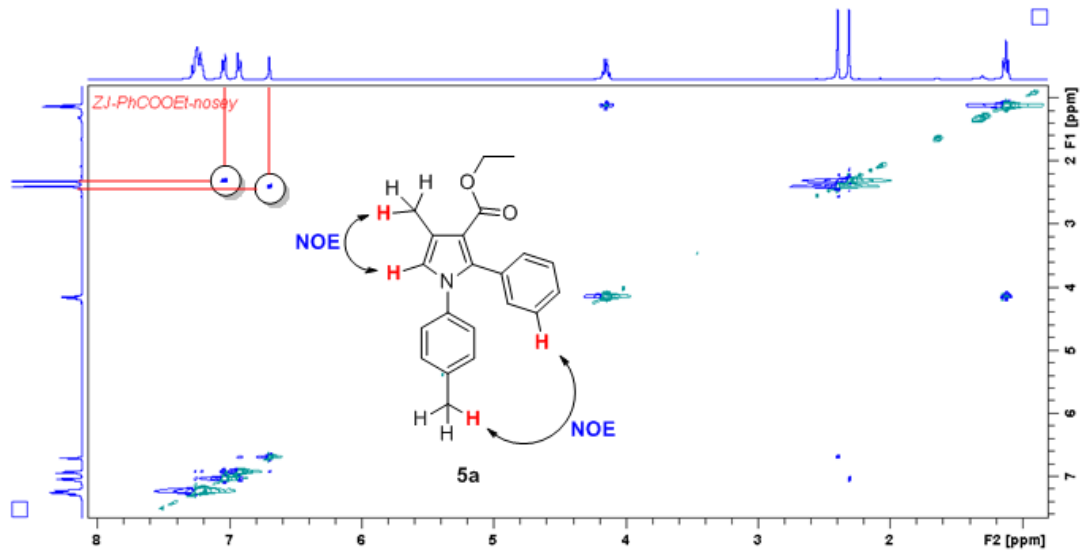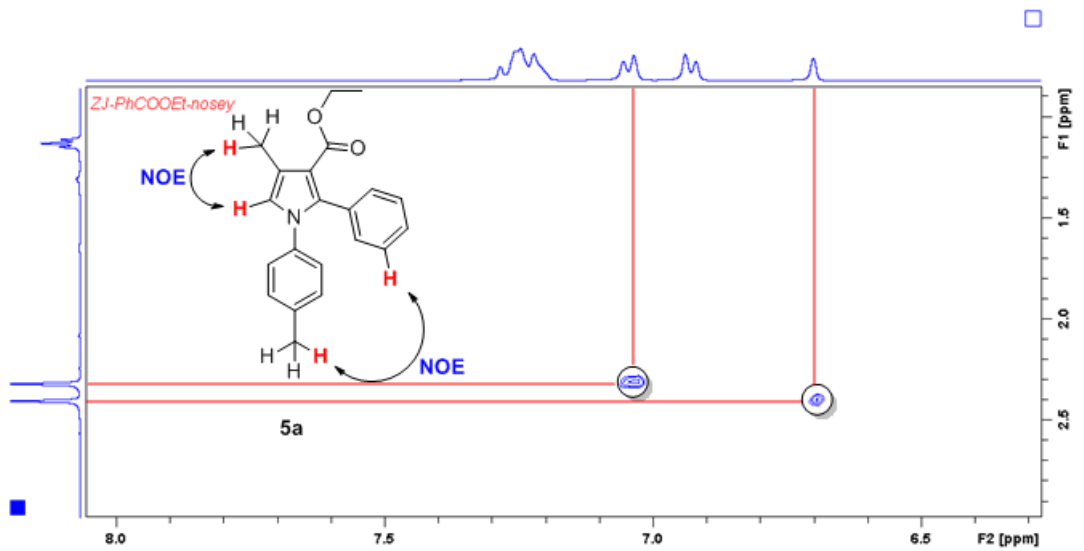

## G. X-ray Crystallographic Analysis of 9

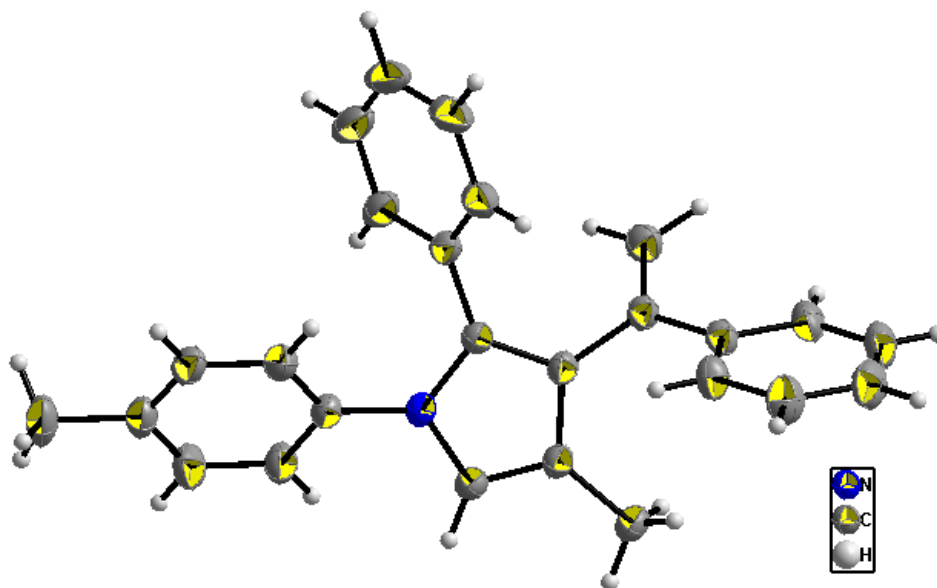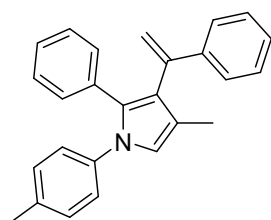

9

Summary of Data CCDC 1047287

---

Formula: C<sub>26</sub> H<sub>23</sub> N<sub>1</sub>

Unit Cell Parameters: a 15.205(3) b 7.3621(15) c 18.007(4) P2<sub>1</sub>/n
